# Supplementary material
Source: publisher figshare collection journal article supplement (https://gsapubs.figshare.com/articles/dataset/_/21606054)

Supplementary Plate P1 - **Ocean Drilling Program (ODP) boreholes analyzed.**

Each well is displayed with its geographical location and simplified stratigraphy in the first page.

The salinity and temperature profiles and modelling results are displayed in the second page. Note that at the bottom of the second page is a close-up of the modelled hydrate stability in the subsurface.

ODP LEG 160  
SITE 963

Strait of Sicily  
Water depth: 469.8 m  
Measured geothermal gradient in borehole : 50-70.842 °C/ km

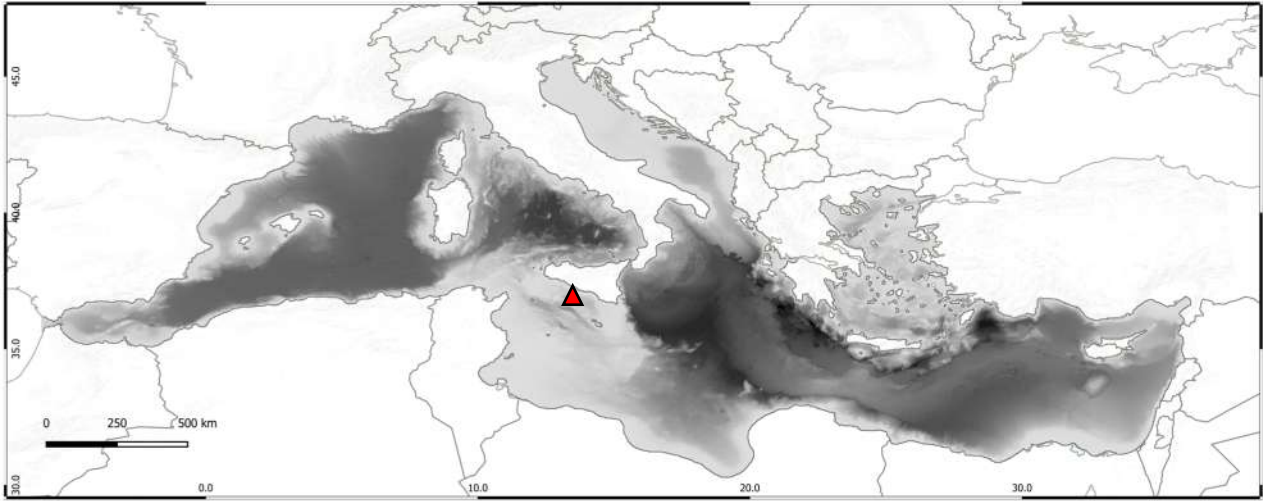

▲ ODP 160 963

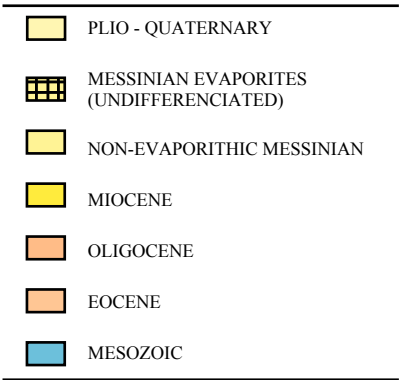

| UNIT | LITHOLOGY        | SUBBOTTOM DEPTH | AGE                       |
|------|------------------|-----------------|---------------------------|
| I    | Nannofossil clay | 0-204.5         | late to early Pleistocene |

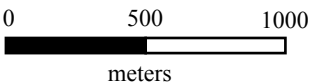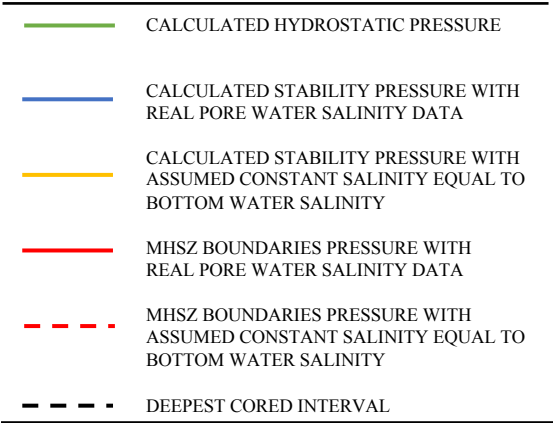

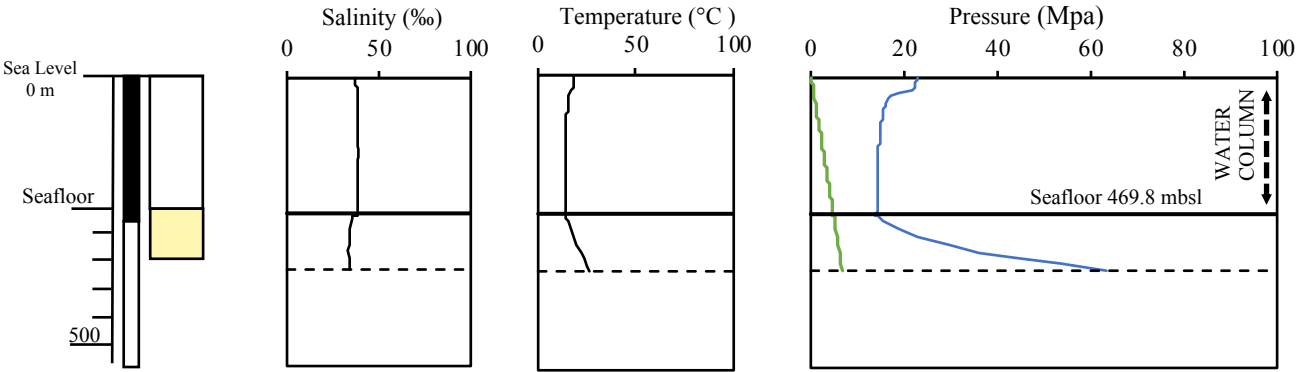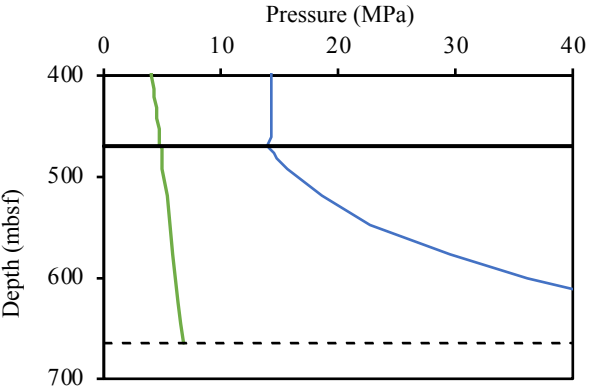

ODP LEG 160  
SITE 964

Calabrian Ridge, Ionian Basin  
Water depth: 3657.7 m  
Measured geothermal gradient in borehole : 17.391-44.828 °C/km

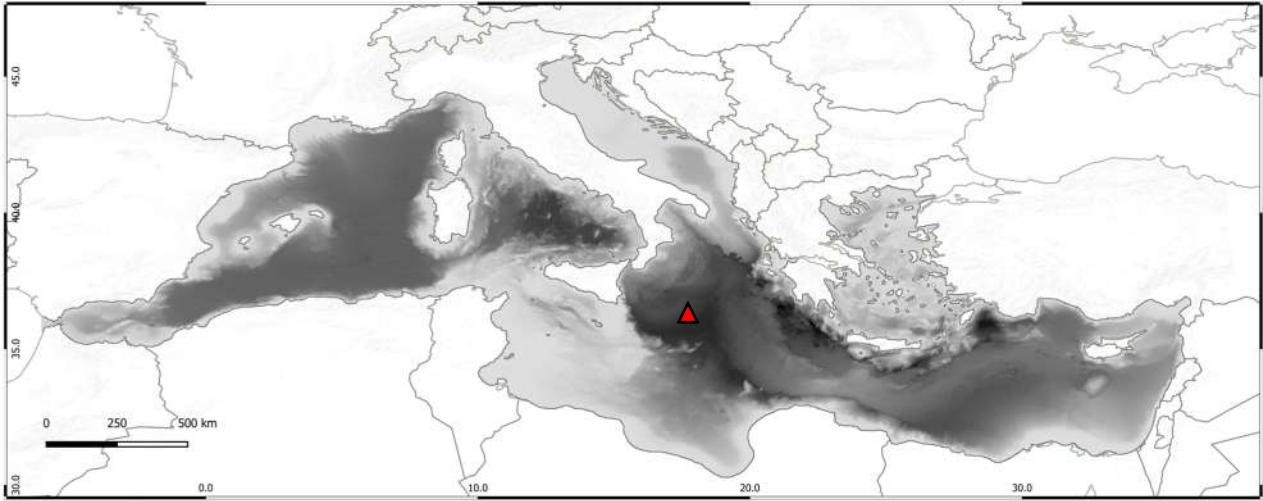

▲ ODP 160 964

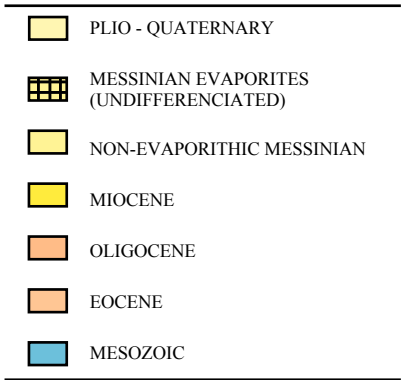

| UNIT | LITHOLOGY                                                       | SUBBOTTOM DEPTH | AGE                        |
|------|-----------------------------------------------------------------|-----------------|----------------------------|
| I    | Nannofossil clay, clayey nannofossil ooze, and nannofossil ooze | 0-108.6         | early Pliocene to Holocene |

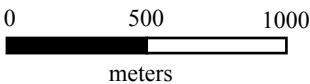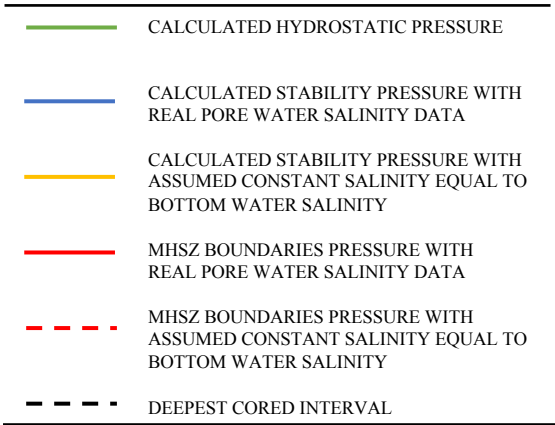

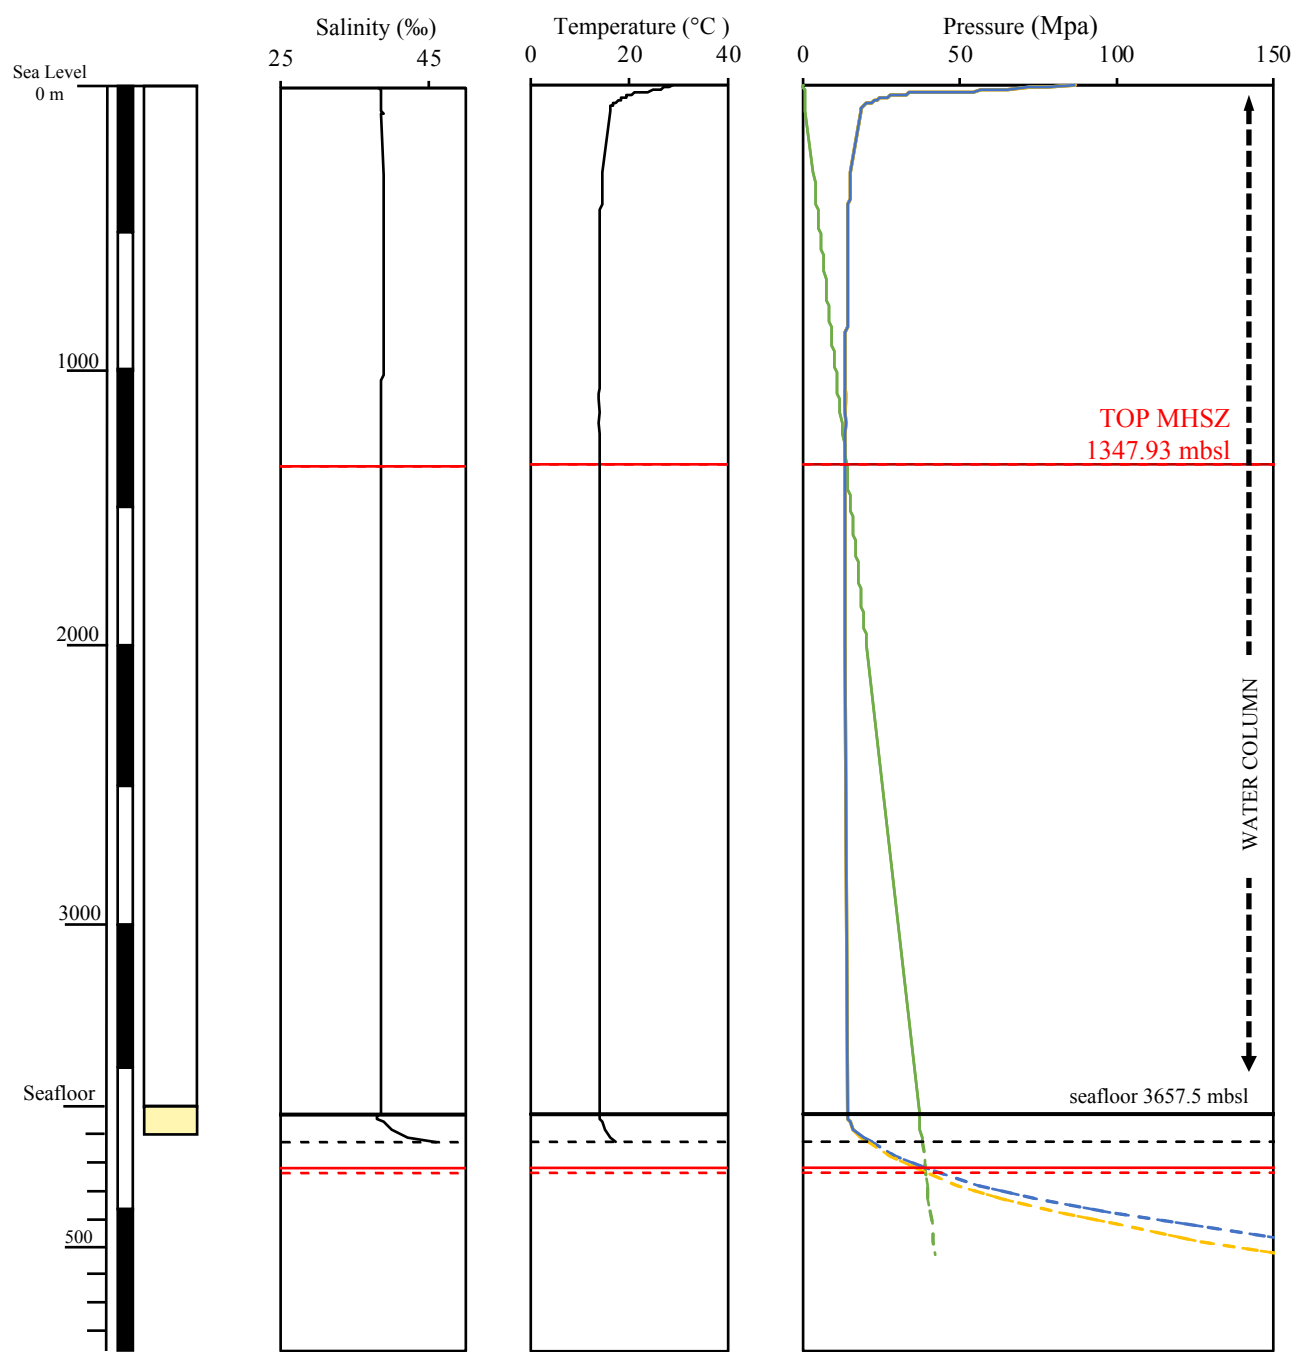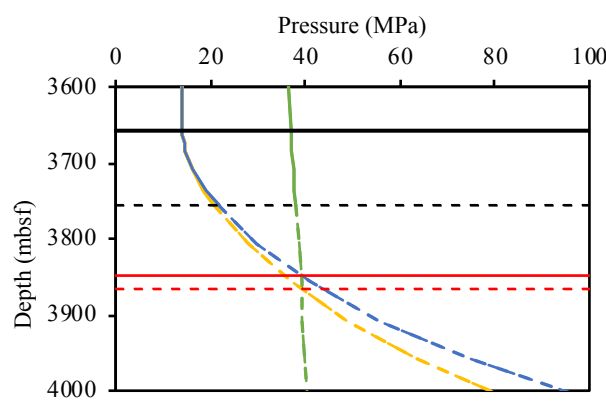

ODP LEG 160  
SITE 965

North to south Eratosthenes Seamount to Cyprus margin transect  
Water depth: 1506.6 m  
Measured geothermal gradient in borehole : 7.5 °C/km

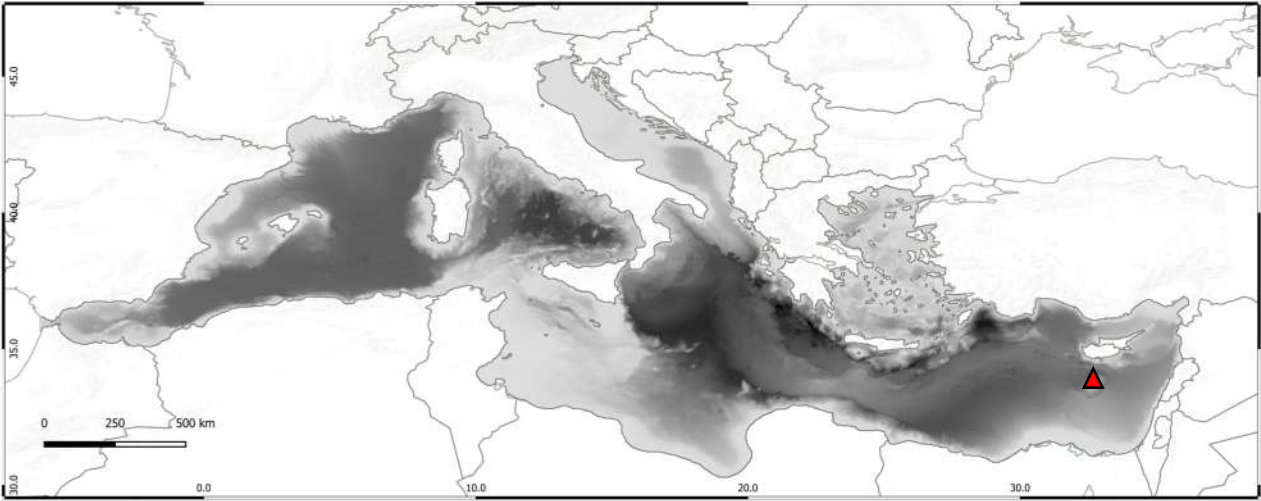

▲ ODP 160 965



| UNIT | LITHOLOGY                                                                         | SUBBOTTOM DEPTH | AGE                                 |
|------|-----------------------------------------------------------------------------------|-----------------|-------------------------------------|
| I    | Nannofossil ooze, clayey nannofossil ooze, nannofossil clay, and foraminifer sand | 0-23.0          | early Pleistocene to early Pliocene |
| II   | Mottled calcareous clay with scattered carbonate clasts                           | 23-29.3         | early Pliocene                      |
| III  | Shallow-water carbonates                                                          | 29.3-250.4      | Miocene(?)                          |

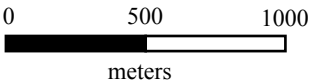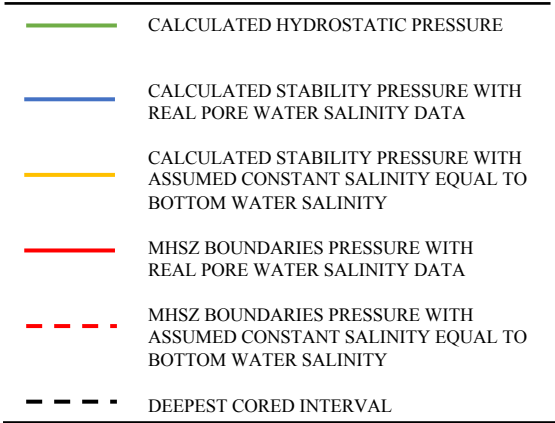

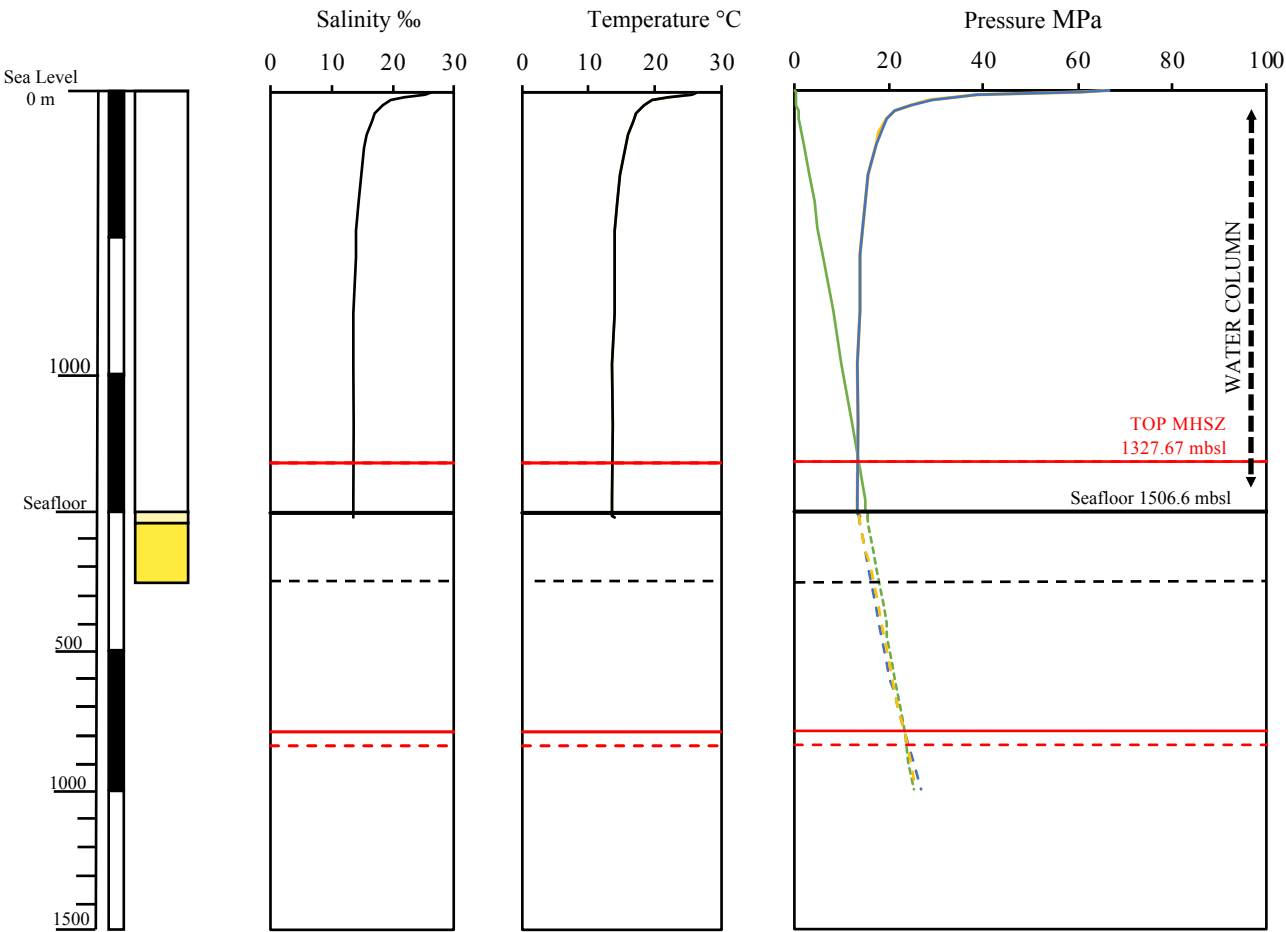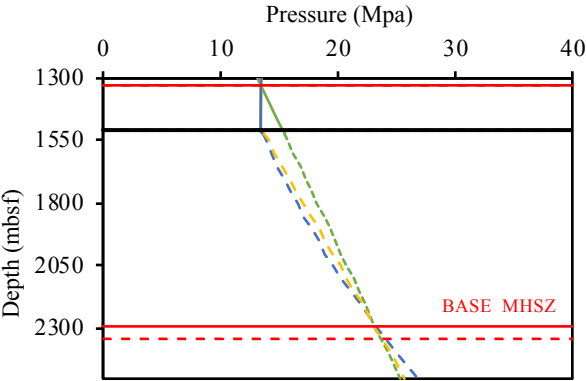

ODP LEG 160  
SITE 966

North to south Eratosthenes Seamount to Cyprus margin transect  
Water depth: 926.3 m  
Measured geothermal gradient in borehole : 25.06 °C/km

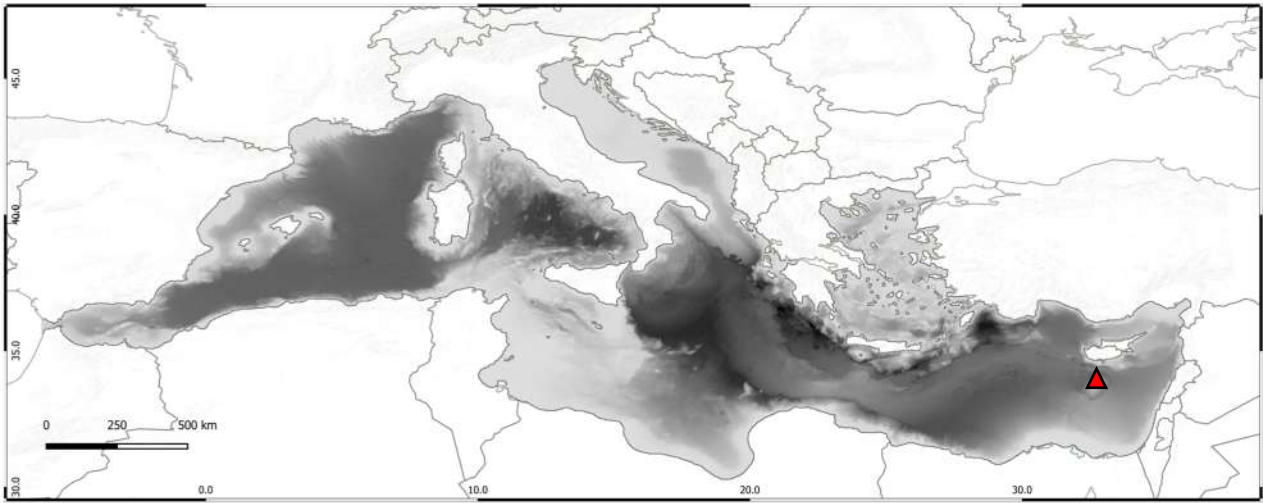

▲ ODP 160 966

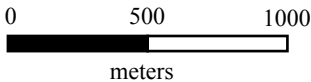

| UNIT | LITHOLOGY                                                                         | SUBBOTTOM DEPTH | AGE                               |
|------|-----------------------------------------------------------------------------------|-----------------|-----------------------------------|
| I    | Nannofossil ooze, clayey nannofossil ooze, and nannofossil ooze with foraminifers | 0-60            | early Pliocene to Holocene        |
| II   | Calcareous paraconglomerate to limestone breccia                                  | 60-96.2         | late Miocene(?) to early Pliocene |
| III  | Shallow-water carbonate limestones                                                | 96.2-298.45     | Miocene(?)                        |
| iv   | Biomicrite with foraminifers                                                      | 298.45-356      | Eocene(?)                         |

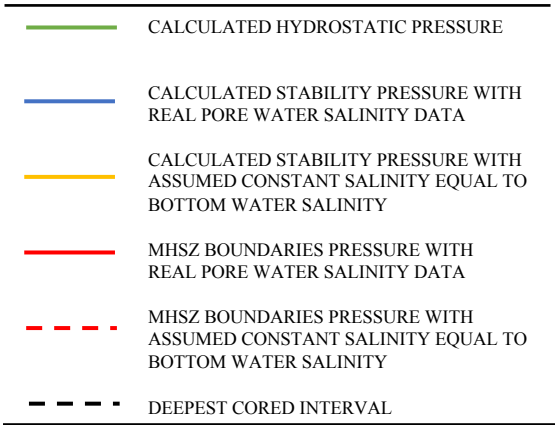



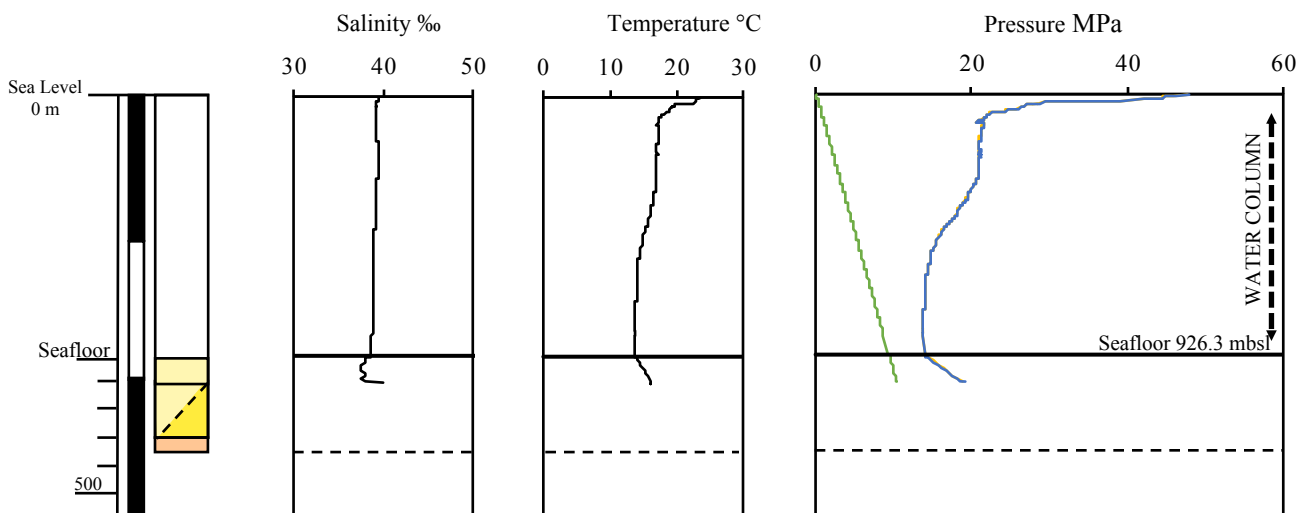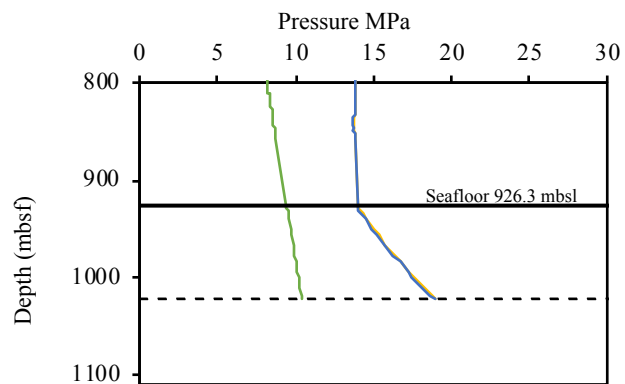

ODP LEG 160  
SITE 967

North to south Eratosthenes Seamount to Cyprus margin transect  
Water depth: 2553 m  
Measured geothermal gradient in borehole : 22.13 °C/km

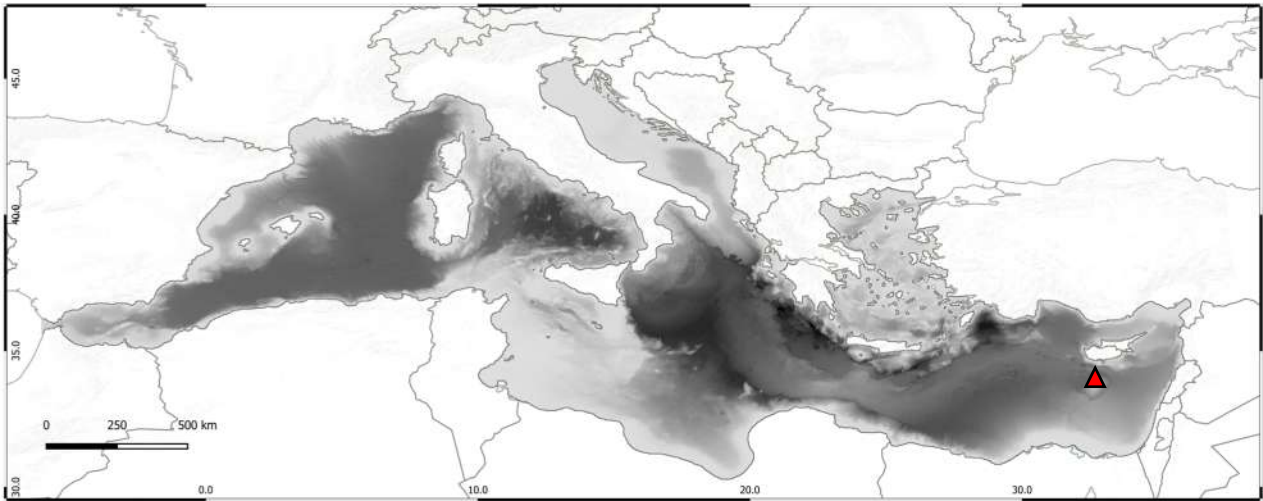

▲ ODP 160 967



| UNIT | LITHOLOGY                             | SUBBOTTOM DEPTH | AGE                                          |
|------|---------------------------------------|-----------------|----------------------------------------------|
| I    | Nannofossil ooze and nannofossil clay | 0-109.5         | middle Pliocene to Holocene                  |
| II   | early Pliocene to middle Pliocene     | 109.5-128.7     | early Pliocene to middle Pliocene            |
| III  | Foraminifer nannofossil chalk         | 128.7-427.0     | Late Cretaceous (Campanian) to middle Eocene |
| IV   | Well-cemented shallow-water limestone | 427.0-504.16    | Late Cretaceous                              |
| V    | Brecciated limestone                  | 504.16-590.69   | Late Cretaceous                              |

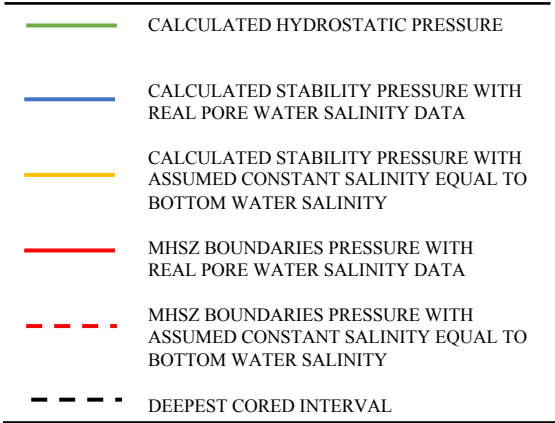

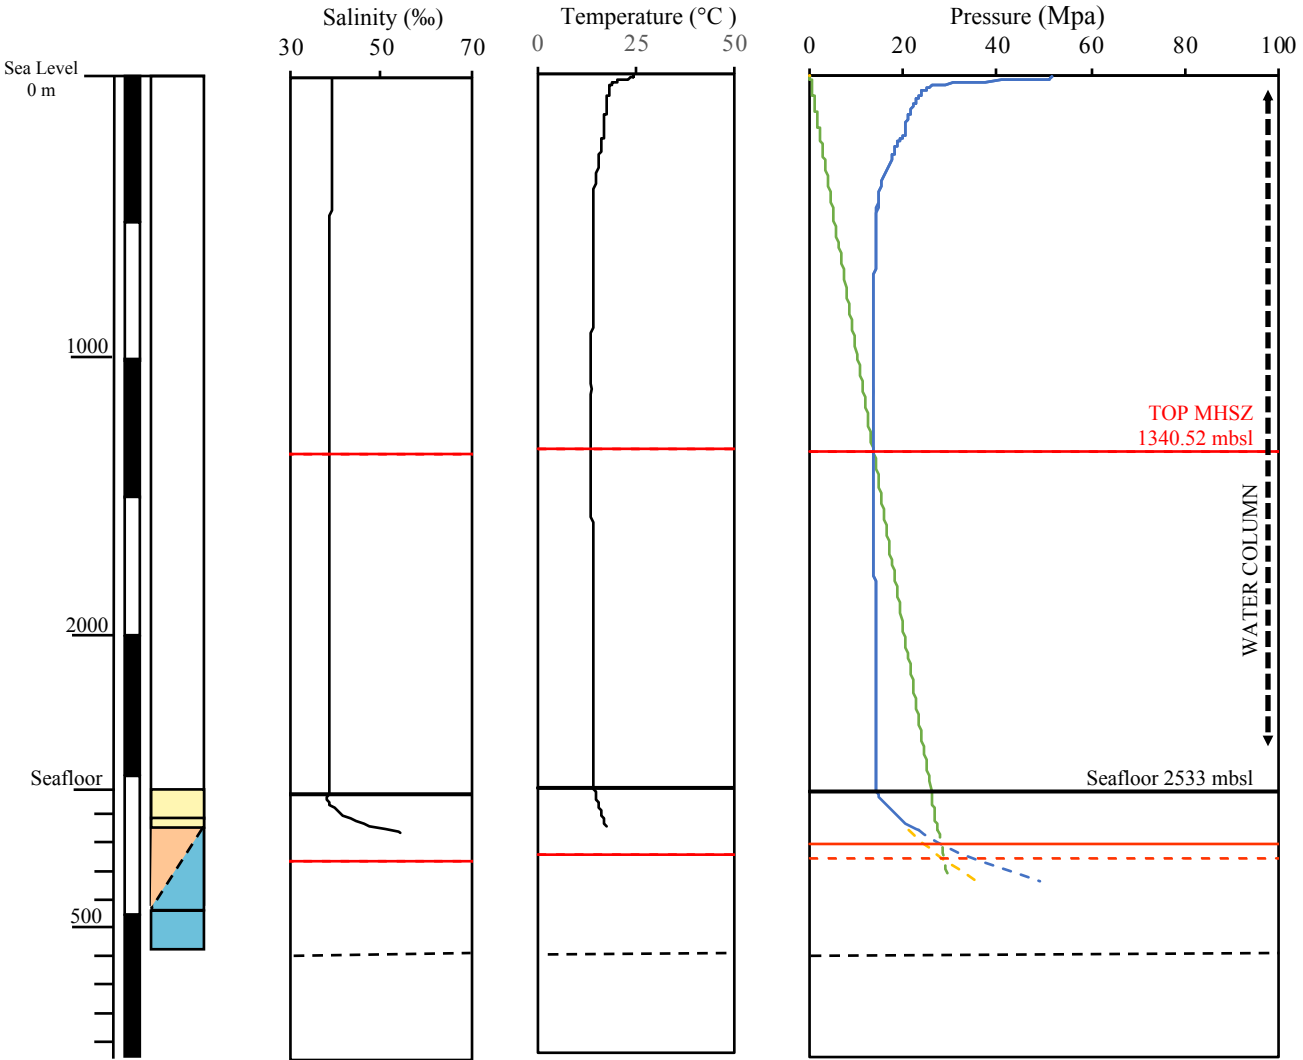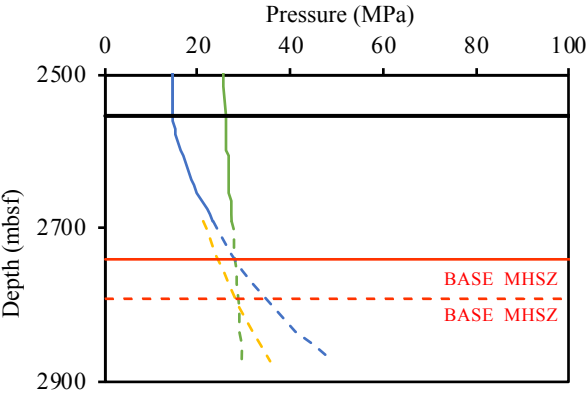

ODP LEG 160  
SITE 968

North to south Eratosthenes Seamount to Cyprus margin transect  
Water depth: 1961.0 m  
Measured geothermal gradient in borehole : 15.74 °C/km

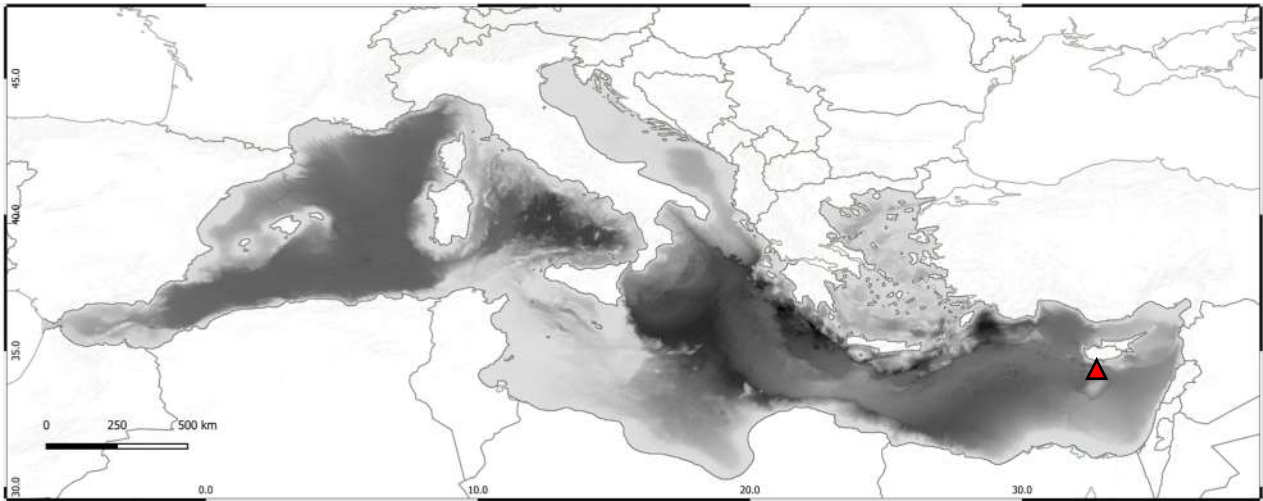

▲ ODP 160 968



| UNIT | LITHOLOGY                                         | SUBBOTTOM DEPTH | AGE                                       |
|------|---------------------------------------------------|-----------------|-------------------------------------------|
| I    | Nannofossil-rich fine-grained sediments           | 0-143           | middle-late Pleistocene to early Pliocene |
| II   | Nannofossil- and clay-rich fine-grained sediments | 143-167         | early Pliocene to Messinian?              |
| III  | Clay, silt, and minor sand                        | 167-302.7       | Messinian?                                |

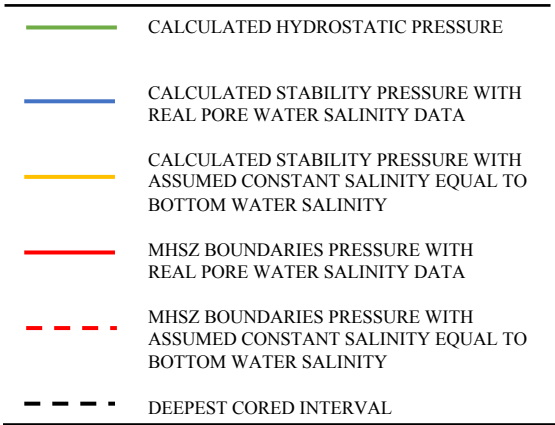

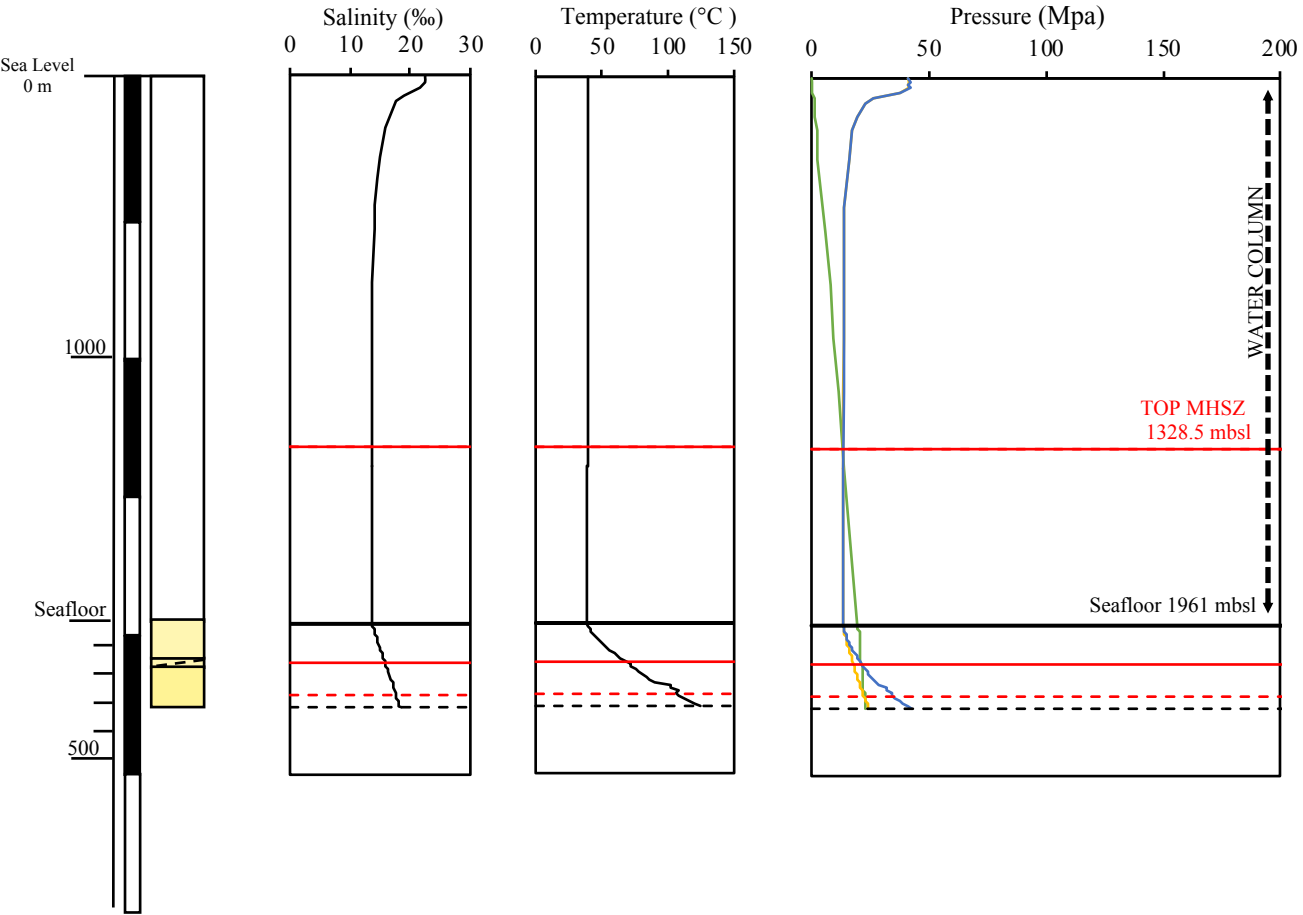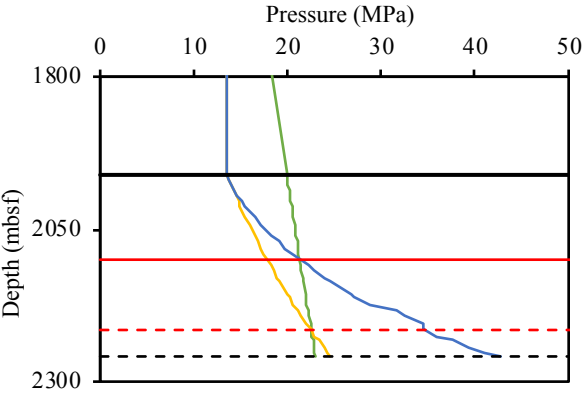

ODP LEG 160  
SITE 969

Mediterranean Ridge  
Water depth: 2200.3 m  
Measured geothermal gradient in borehole : 8-11.20 °C/km

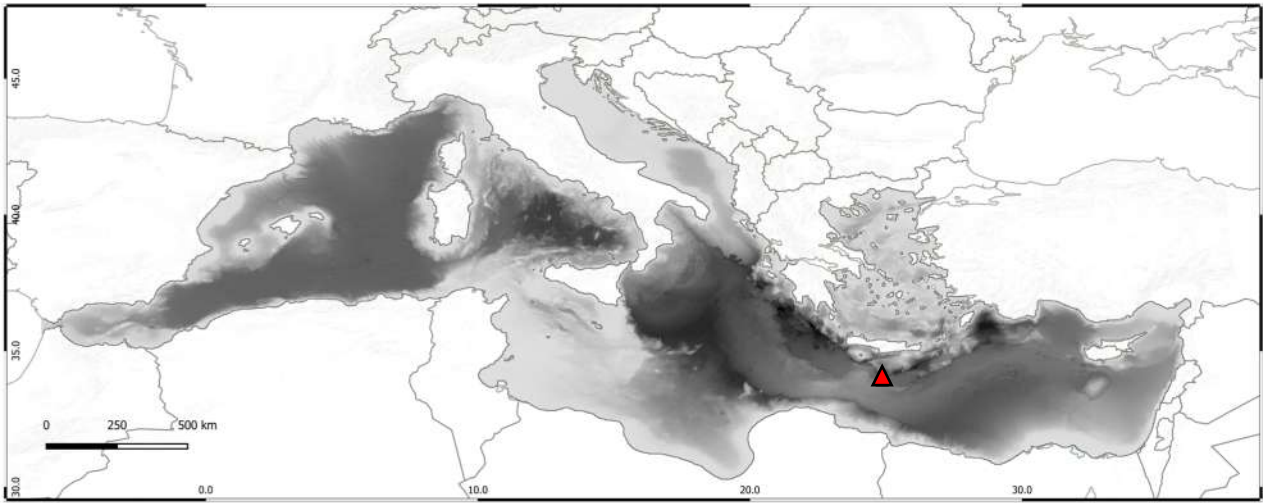

▲ ODP 160 969



| UNIT | LITHOLOGY                                                                                                 | SUBBOTTOM<br>DEPTH | AGE                           |
|------|-----------------------------------------------------------------------------------------------------------|--------------------|-------------------------------|
| I    | Nannofossil ooze,<br>clayey nannofossil<br>ooze, foraminifer<br>nannofossil ooze, and<br>nannofossil clay | 0-116.2            | early Pliocene<br>to Holocene |

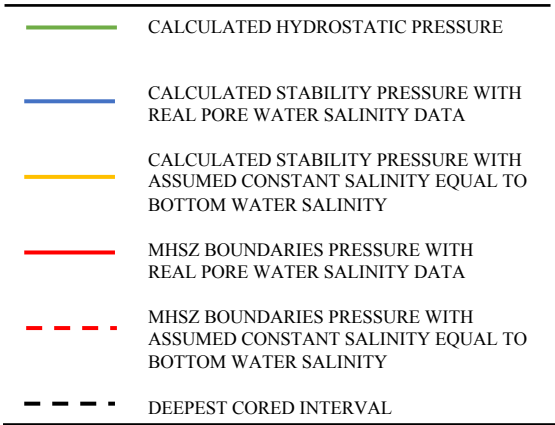

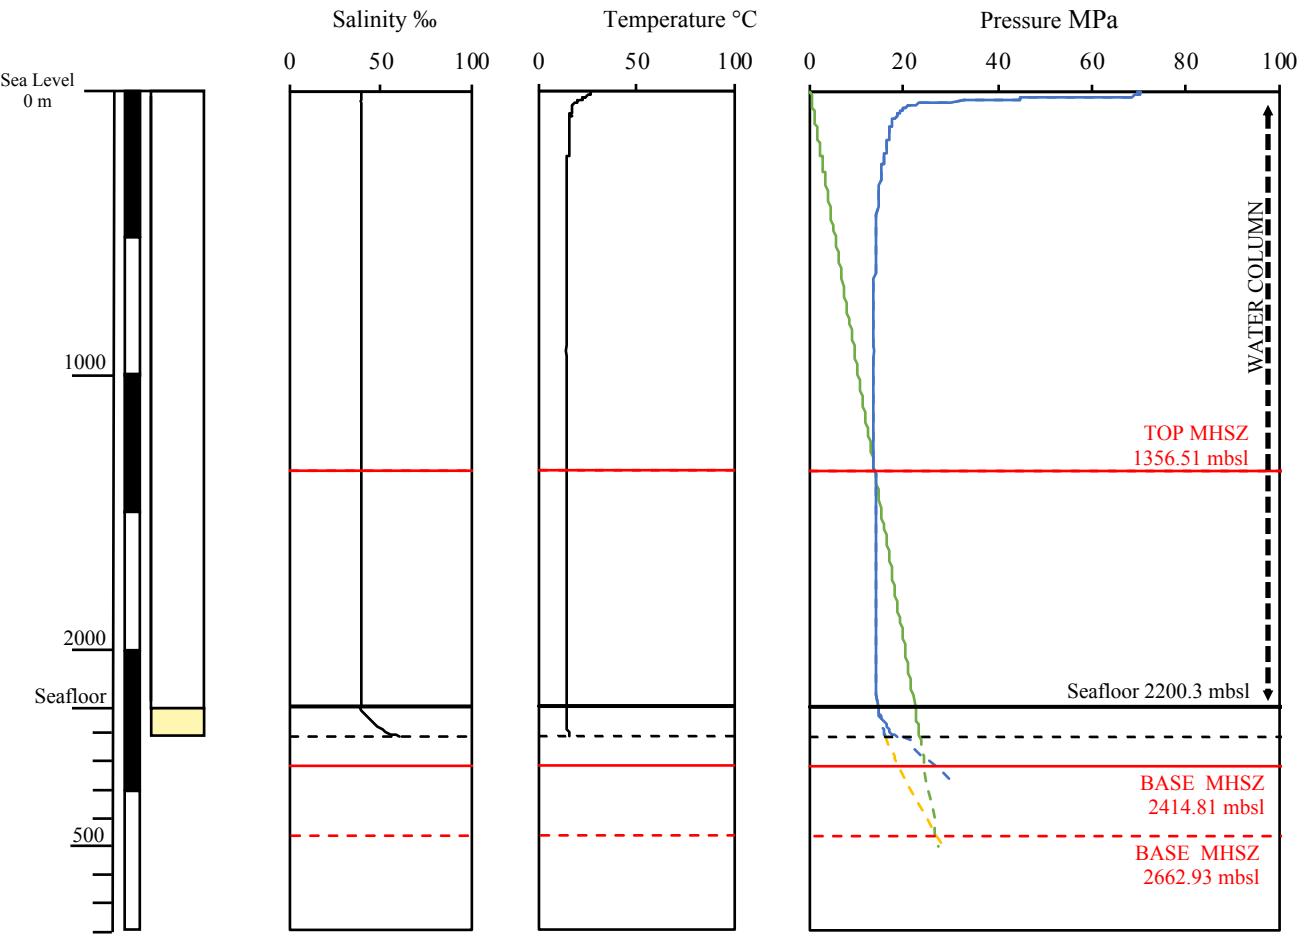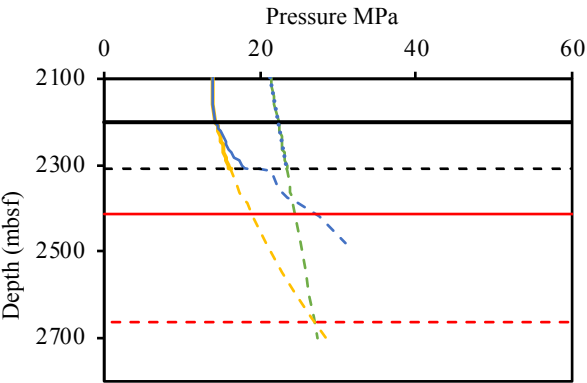

ODP LEG 160  
SITE 970  
HOLE A

Milano mud dome  
Water depth: 2075.5 m  
Measured geothermal gradient in borehole : 11.76-18.36°C/km

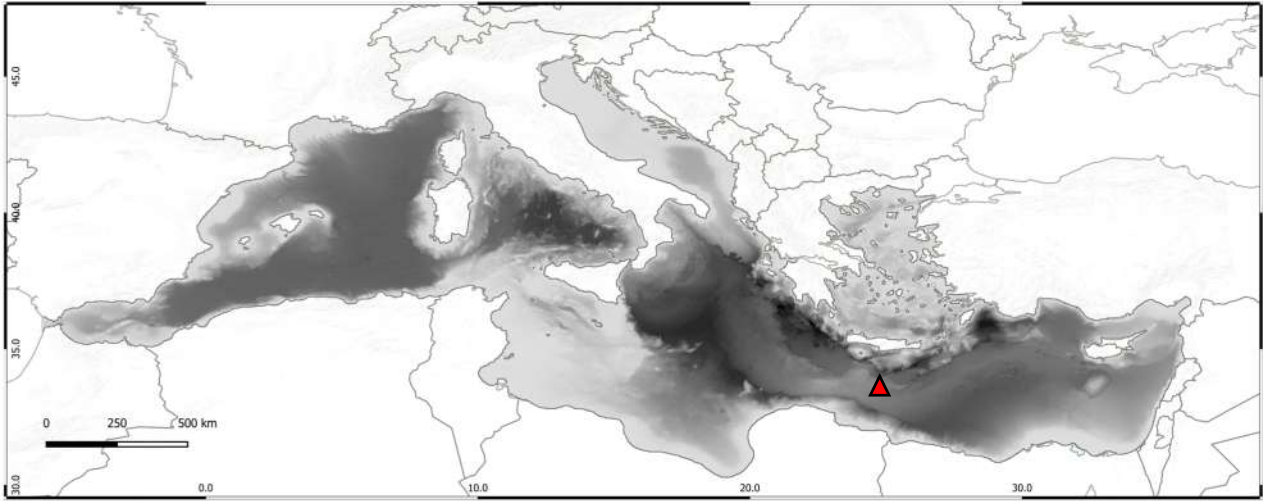

▲ ODP 160 970 A

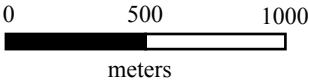

| UNIT | LITHOLOGY                                                                                                     | SUBBOTTOM DEPTH                                   | AGE                               |
|------|---------------------------------------------------------------------------------------------------------------|---------------------------------------------------|-----------------------------------|
| I    | Nannofossil clay, nannofossil ooze, and clayey nannofossil ooze                                               | 0-0.6, 18.73-19.74, 134.0-153.47, and 192.3-201.4 | late Pliocene to late Pleistocene |
| II   | Matrix-supported clast-rich debris-flow deposits, matrixsupported breccia/conglomerate, and polymictic gravel | 0.6-18.73, 19.74-134.0, 153.47-192.3              | Pleistocene                       |
| III  | Clay, silt, and minor sand                                                                                    | 167-302.7                                         | Messinian?                        |

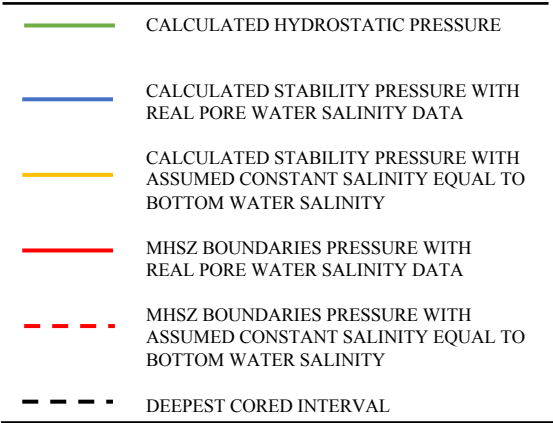



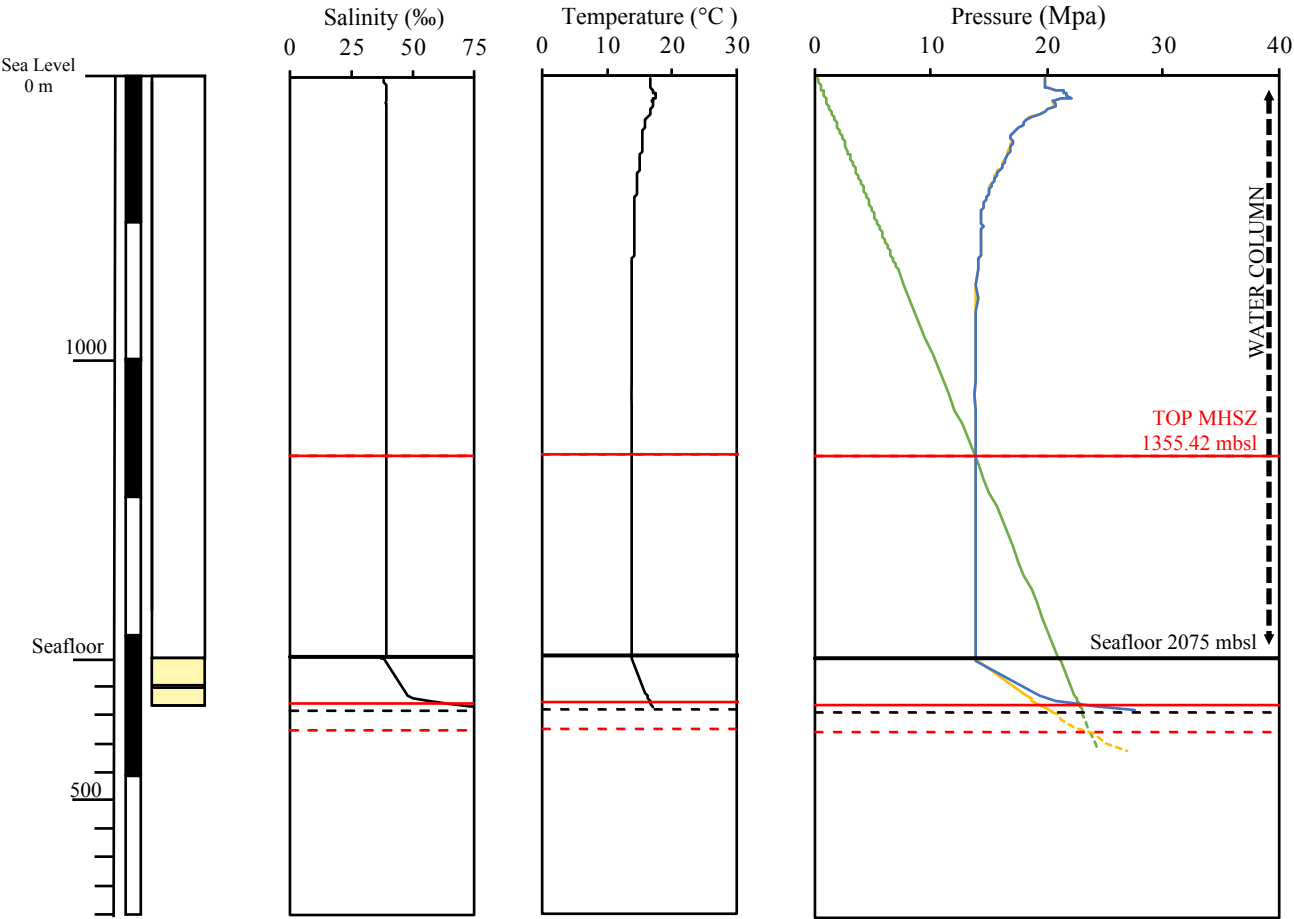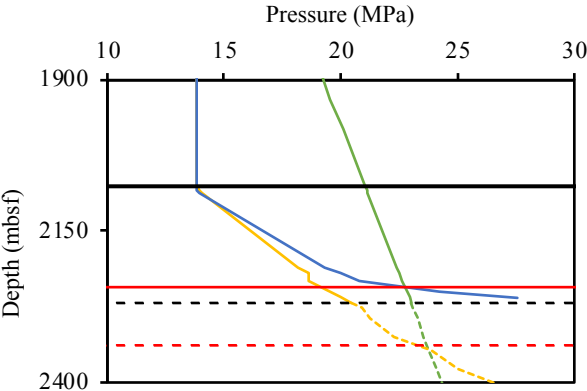

ODP LEG 160  
SITE 970  
HOLE B

Milano mud dome  
Water depth: 2078.6 m  
Measured geothermal gradient in borehole : 11.76 °C/km



▲ ODP 160 970 B



| UNIT | LITHOLOGY                                                       | SUBBOTTOM DEPTH | AGE                               |
|------|-----------------------------------------------------------------|-----------------|-----------------------------------|
| I    | Nannofossil clay, nannofossil ooze, and clayey nannofossil ooze | 0-47.5          | late Pliocene to late Pleistocene |

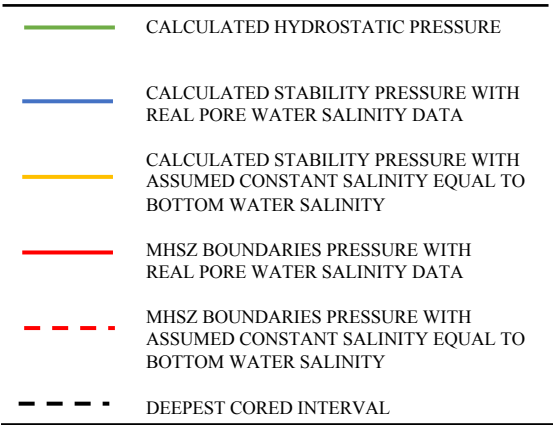

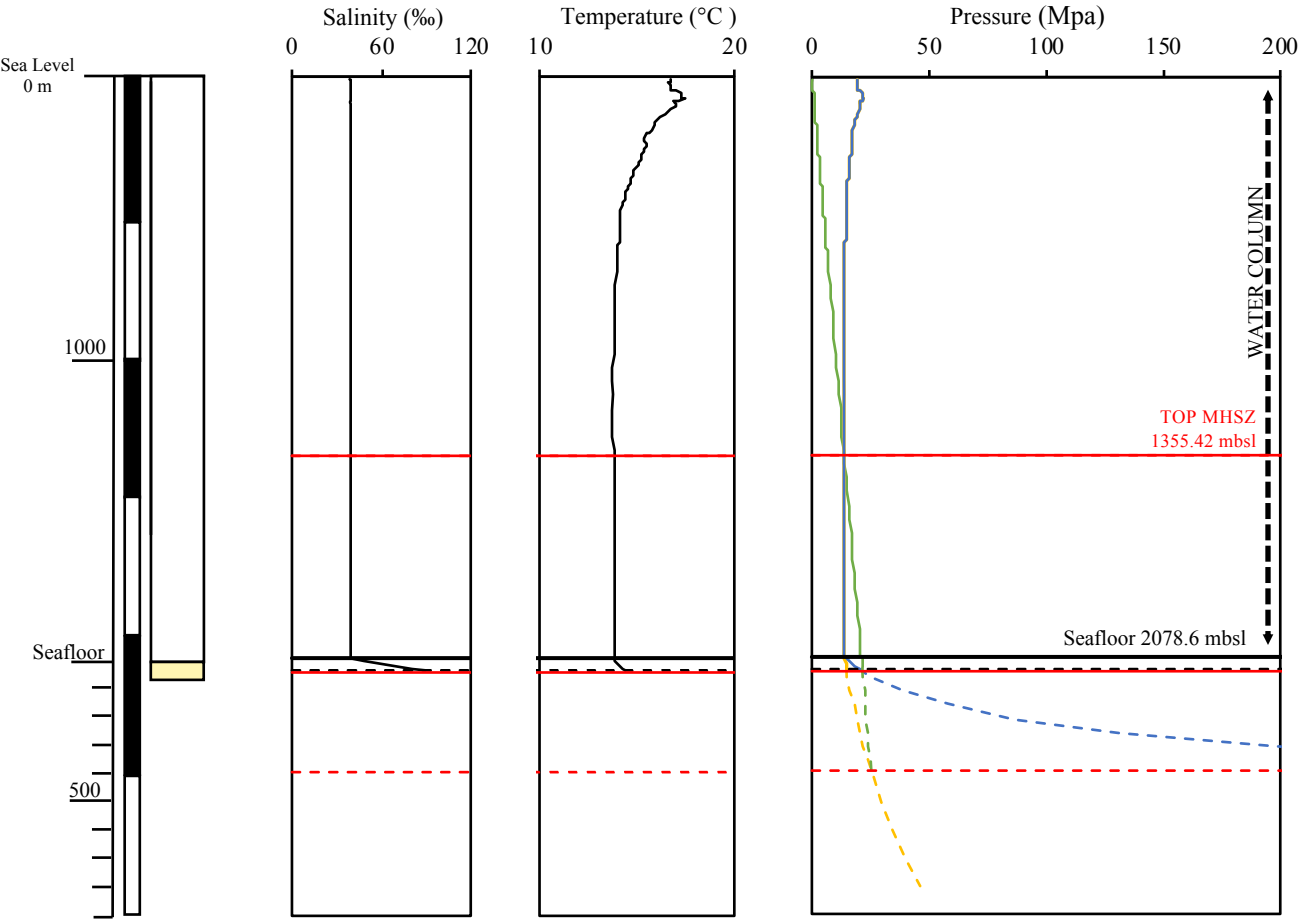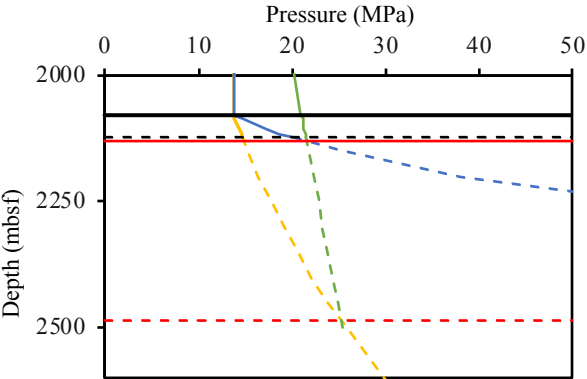

ODP LEG 160  
SITE 970  
HOLE C

Milano mud dome  
Water depth: 2036.9 m  
Measured geothermal gradient in borehole : 11.76 °C/km

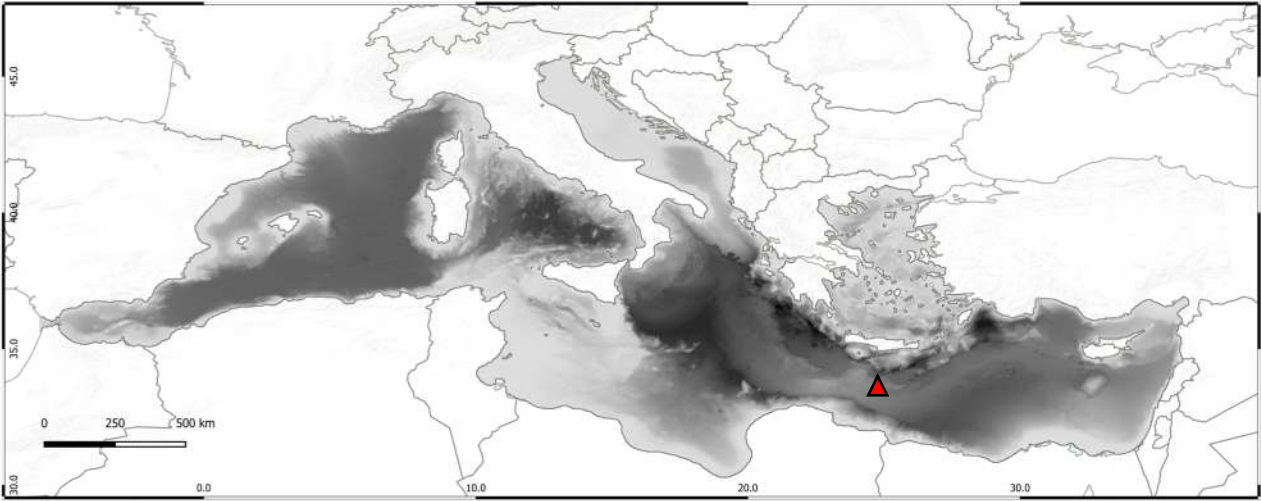

▲ ODP 160 970 C



| UNIT | LITHOLOGY                                                                                                      | SUBBOTTOM DEPTH | AGE         |
|------|----------------------------------------------------------------------------------------------------------------|-----------------|-------------|
| II   | Matrix-supported clast-rich debris-flow deposits, matrixsupported breccia/conglomerate , and polymictic gravel | 0-35            | Pleistocene |

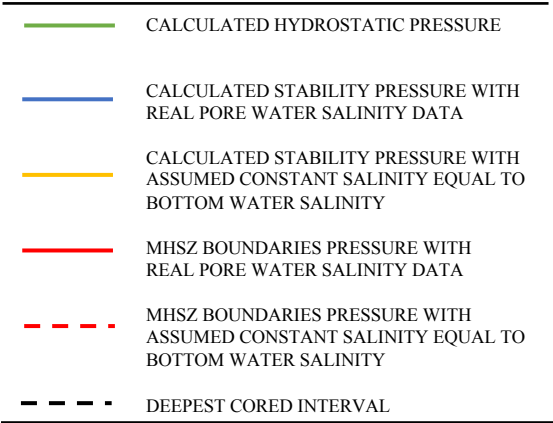

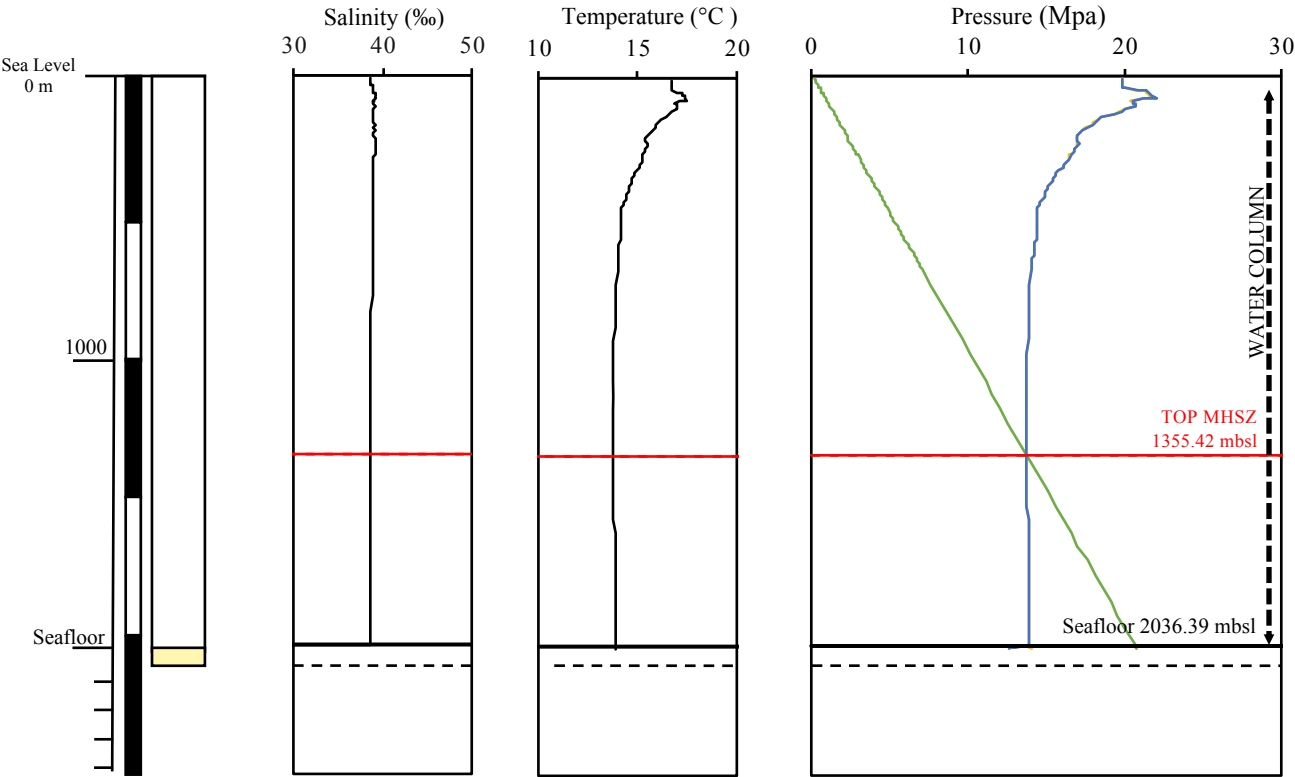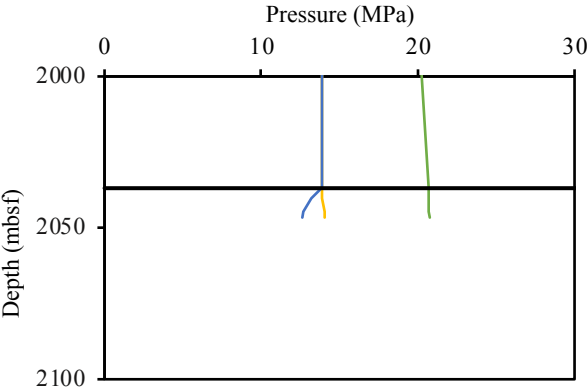

ODP LEG 160  
SITE 970  
HOLE D

Milano mud dome  
Water depth: 1953.7 m  
Measured geothermal gradient in borehole : 11.76 °C/km



▲ ODP 160 970 D



| UNIT | LITHOLOGY                                                                                                     | SUBBOTTOM DEPTH | AGE         |
|------|---------------------------------------------------------------------------------------------------------------|-----------------|-------------|
| II   | Matrix-supported clast-rich debris-flow deposits, matrixsupported breccia/conglomerate, and polymictic gravel | 0- 42.80        | Pleistocene |
|      |                                                                                                               |                 |             |

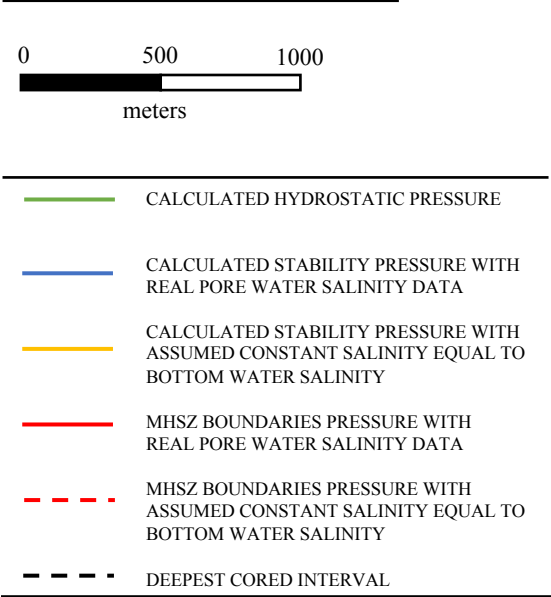

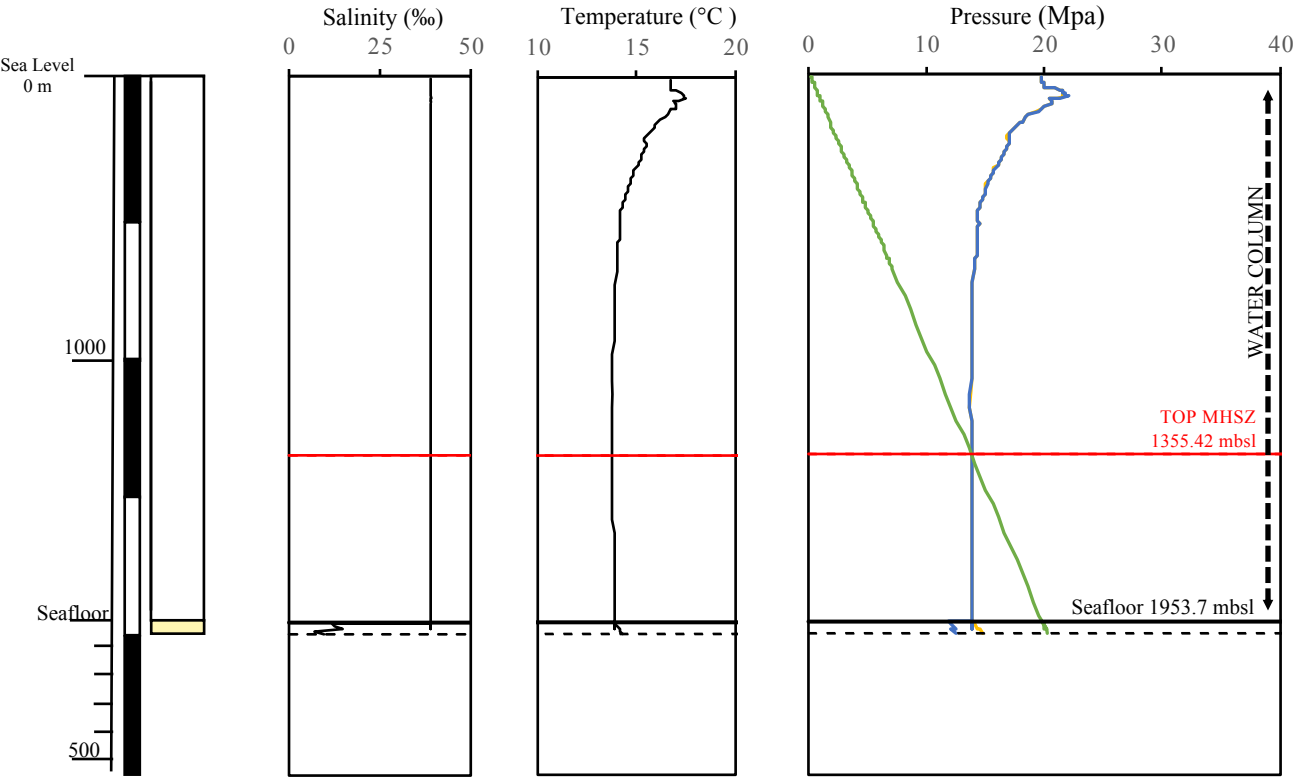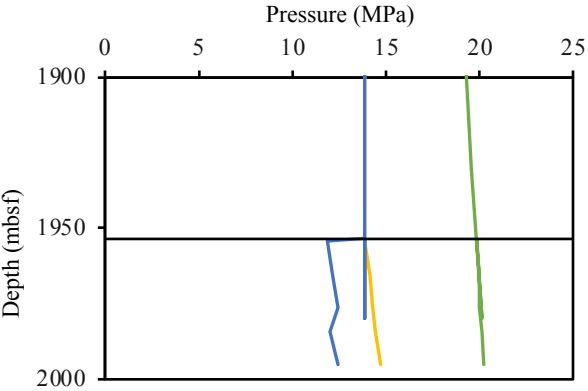

ODP LEG 160  
SITE 971  
HOLE A

Napoli mud dome  
Water depth: 2026.1 m  
Measured geothermal gradient in borehole : 23.816 – 45.19 °C/km

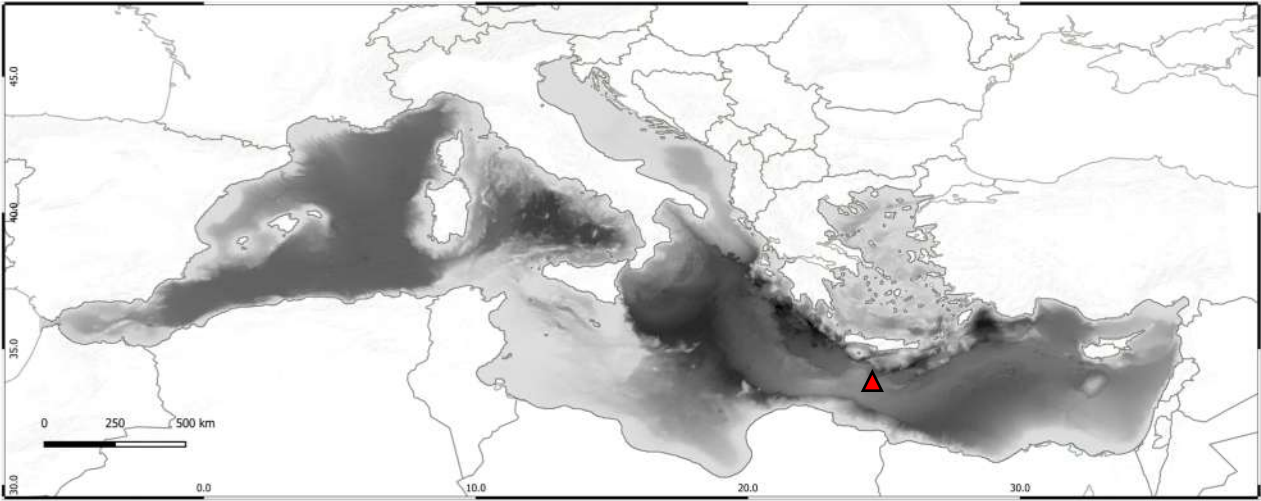

▲ ODP 160 971 A



| UNIT | LITHOLOGY                                                                                                         | SUBBOTTOM DEPTH    | AGE                       |
|------|-------------------------------------------------------------------------------------------------------------------|--------------------|---------------------------|
| I    | Nannofossil clay, nannofossil ooze, and clayey nannofossil ooze                                                   | 0-16.5<br>77-105.9 | late Pliocene to Holocene |
| IIA  | Matrix-supported clast-rich mud debris-flow deposit, mud debris-flow deposit, mousselike silty clay to sandy silt | 16.5-71            | Pleistocene               |
|      |                                                                                                                   |                    |                           |

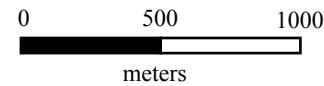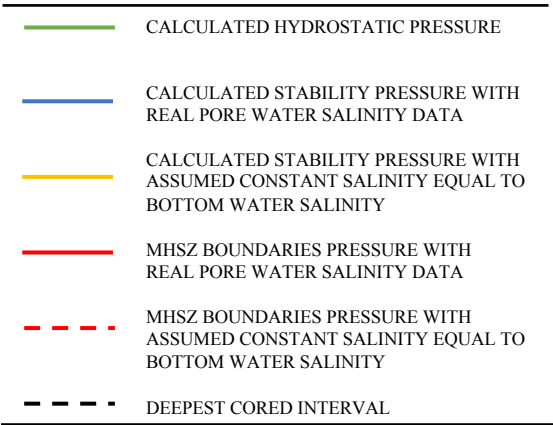



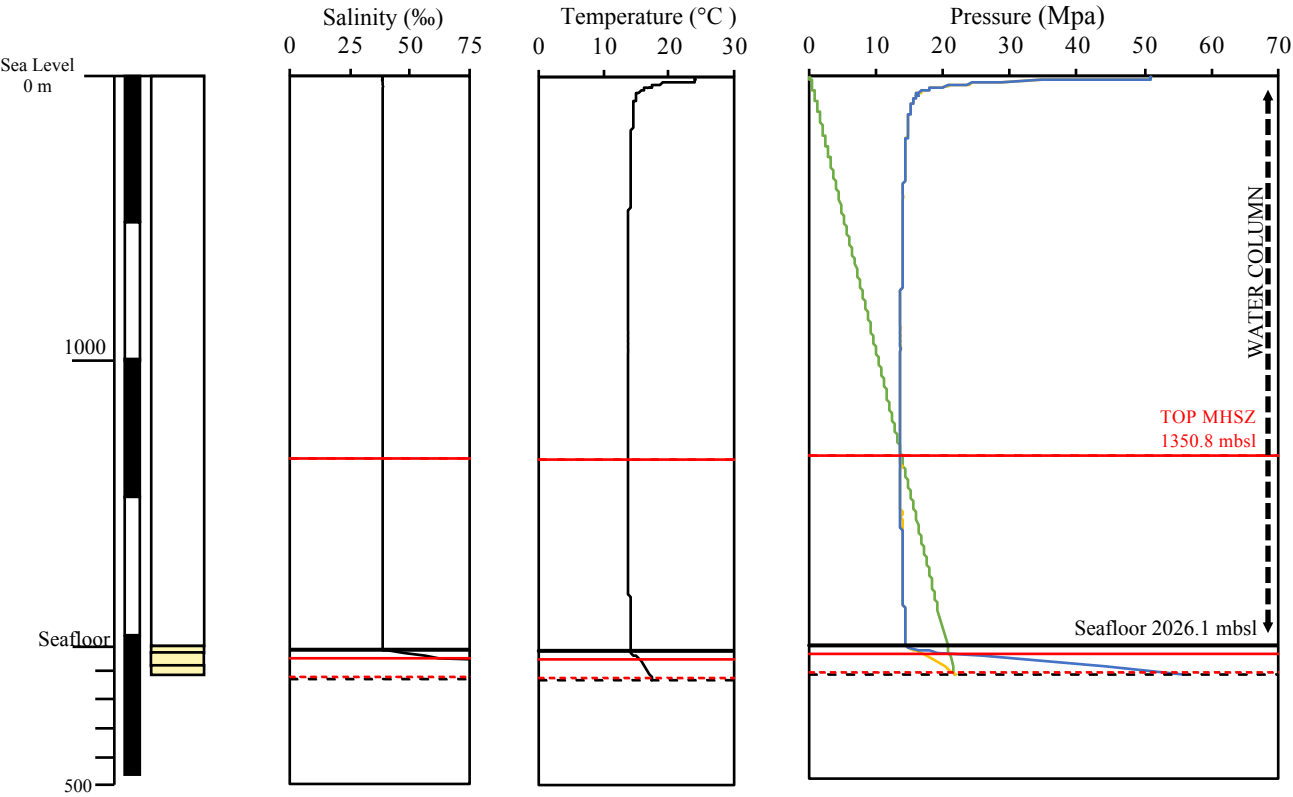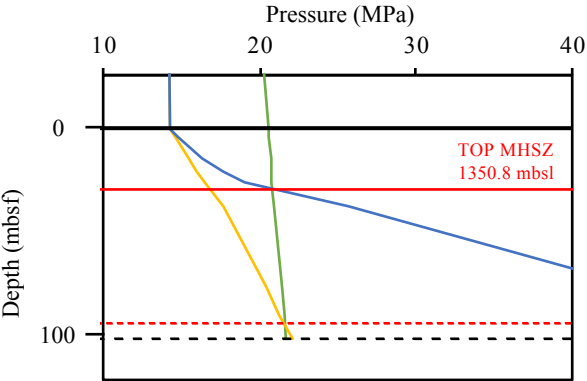

ODP LEG 160  
SITE 971  
HOLE B

Napoli mud dome  
Water depth: 2140.9 m  
Measured geothermal gradient in borehole : 23.81-45.19 °C/km

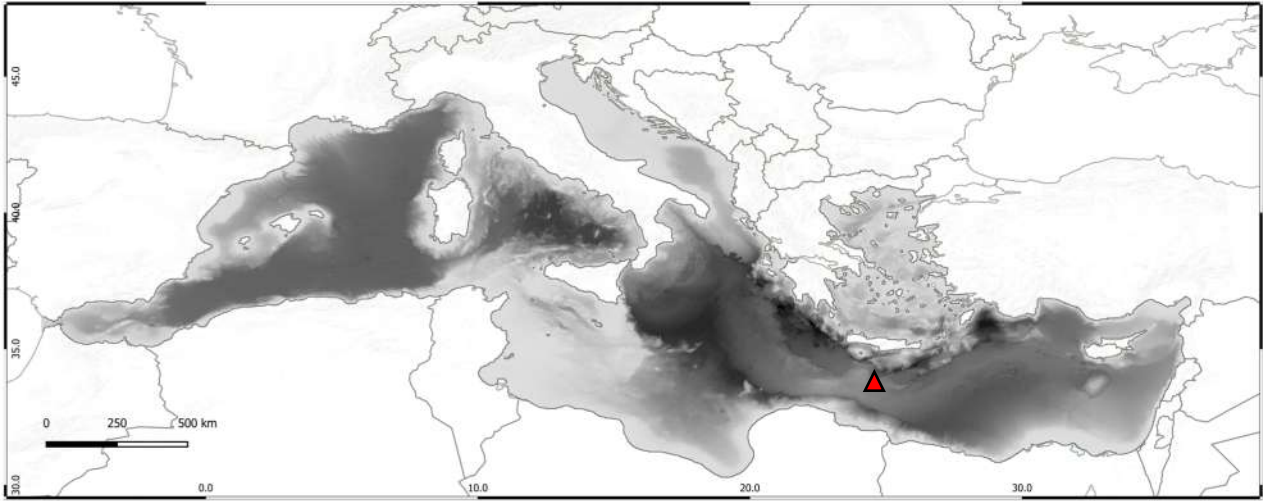

▲ ODP 160 971 B



| UNIT | LITHOLOGY                                                                                                         | SUBBOTTOM DEPTH | AGE                       |
|------|-------------------------------------------------------------------------------------------------------------------|-----------------|---------------------------|
| I    | Nannofossil clay, nannofossil ooze, and clayey nannofossil ooze                                                   | 0-20            | late Pliocene to Holocene |
| IIA  | Matrix-supported clast-rich mud debris-flow deposit, mud debris-flow deposit, mousselike silty clay to sandy silt | 20-203.5        | Pleistocene               |
|      |                                                                                                                   |                 |                           |

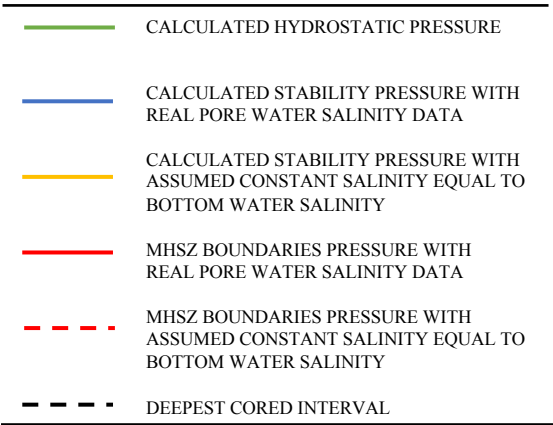

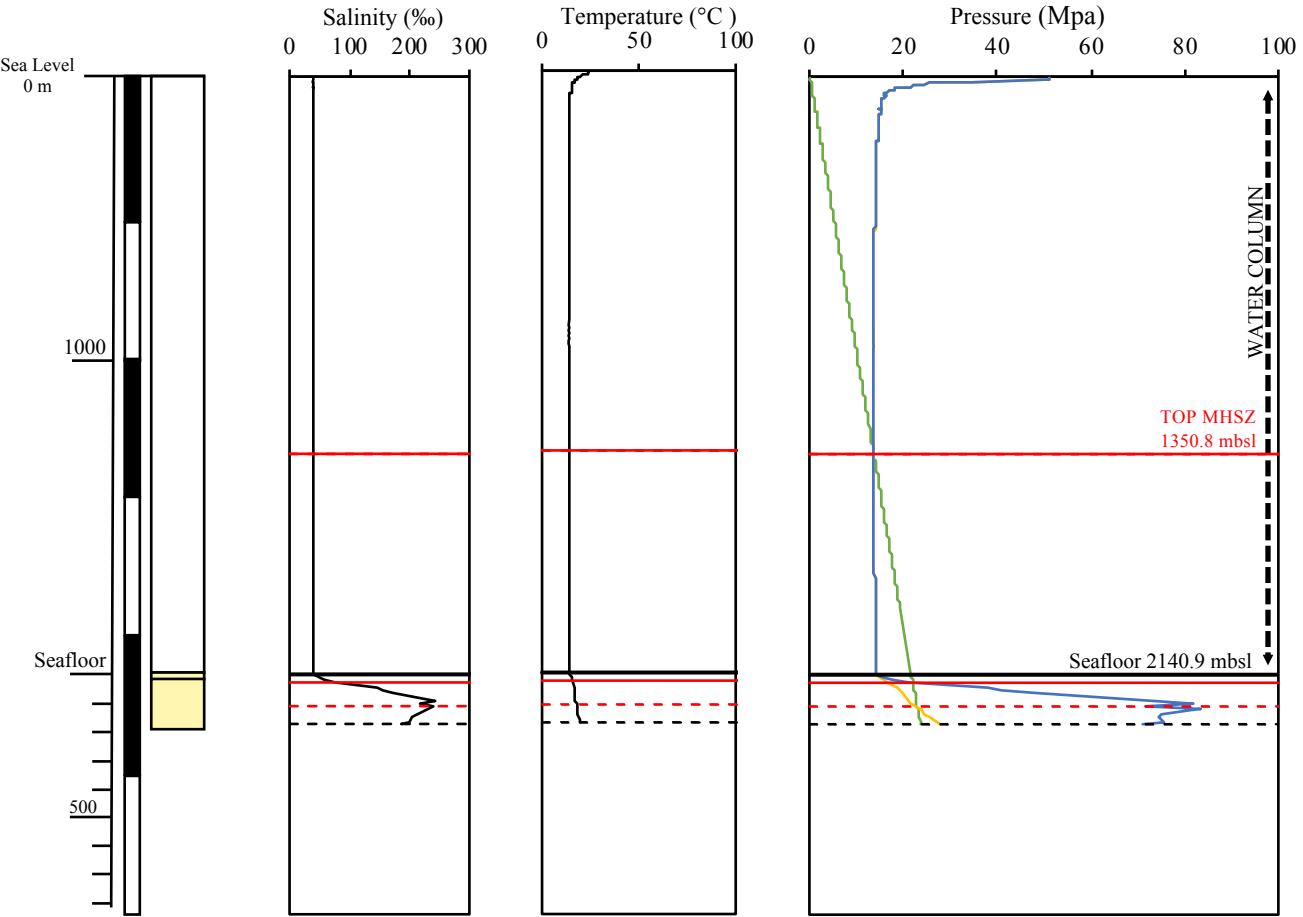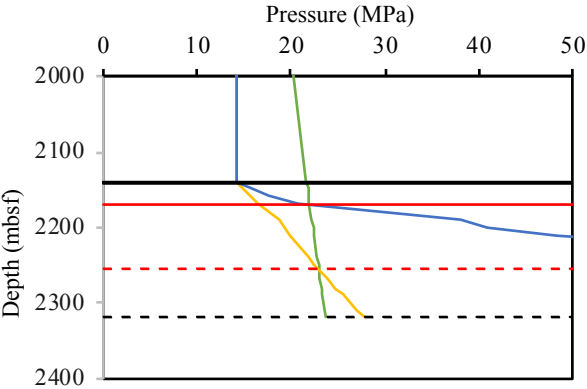

ODP LEG 160  
SITE 971  
HOLE D

Napoli mud dome  
Water depth: 1933.1 m  
Measured geothermal gradient in borehole : 45.19 °C/km

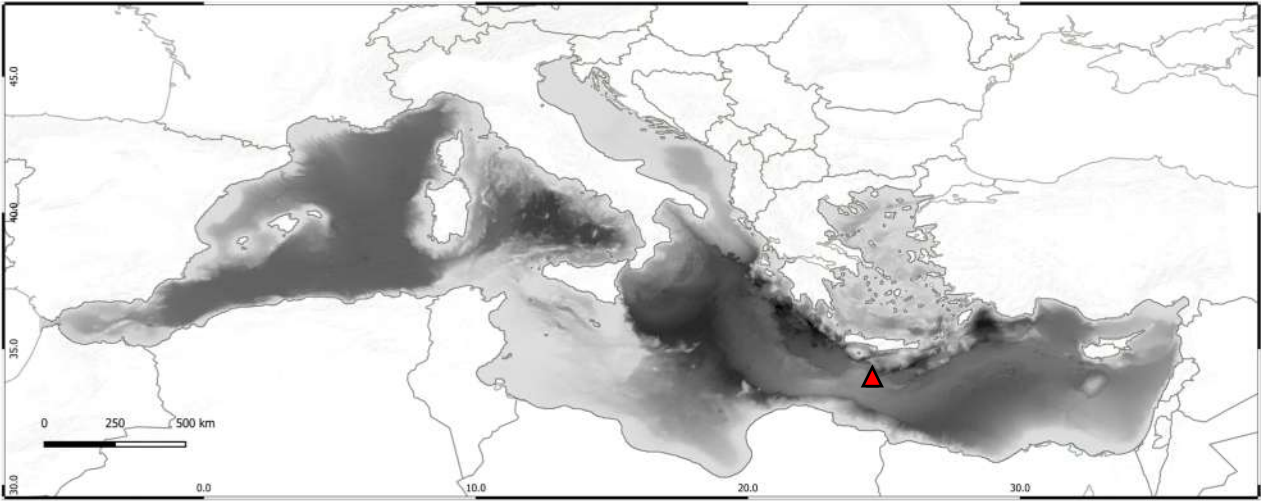

▲ ODP 160 971 D



| UNIT | LITHOLOGY                                                                                                         | SUBBOTTOM DEPTH | AGE         |
|------|-------------------------------------------------------------------------------------------------------------------|-----------------|-------------|
| II   | Matrix-supported clast-rich mud debris-flow deposit, mud debris-flow deposit, mousselike silty clay to sandy silt | 0-46            | Pleistocene |

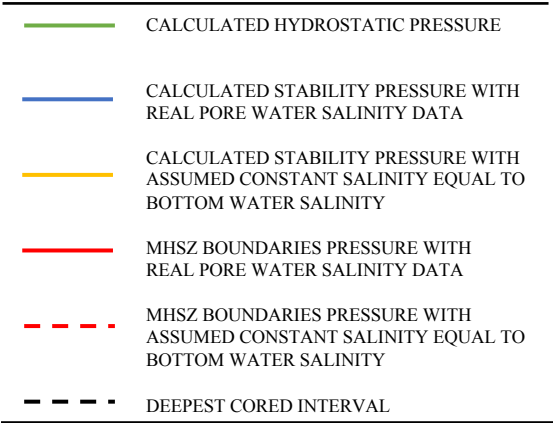

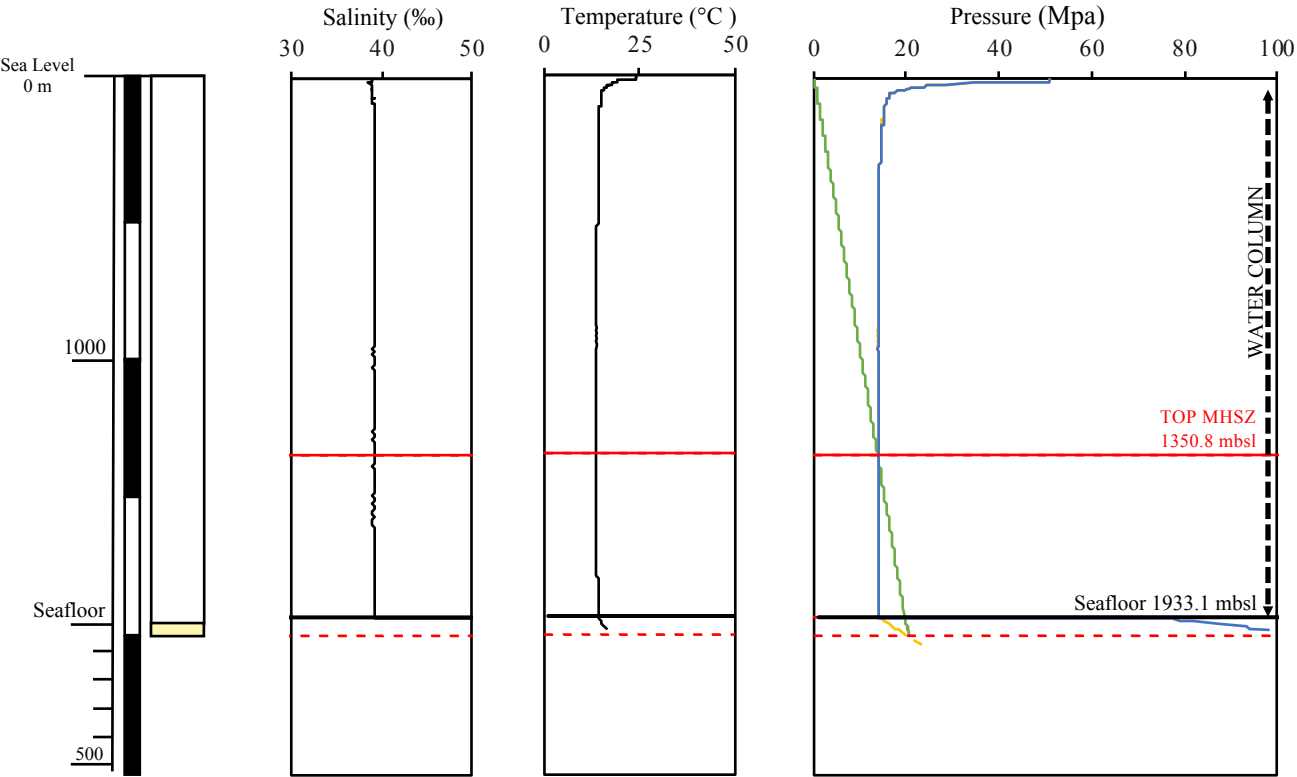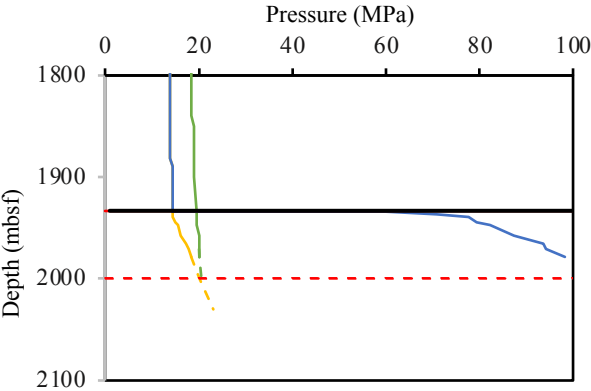

ODP LEG 160  
SITE 971  
HOLE E

Napoli mud dome  
Water depth: 1943.6 m  
Measured geothermal gradient in borehole : 45.19 °C/km



▲ ODP 160 971 E



| UNIT | LITHOLOGY                                                                                                         | SUBBOTTOM DEPTH | AGE         |
|------|-------------------------------------------------------------------------------------------------------------------|-----------------|-------------|
| II   | Matrix-supported clast-rich mud debris-flow deposit, mud debris-flow deposit, mousselike silty clay to sandy silt | 0-28.5          | Pleistocene |

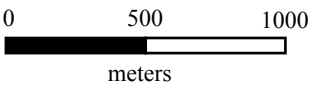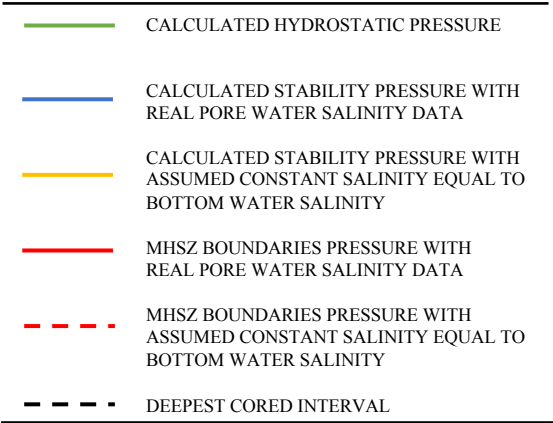

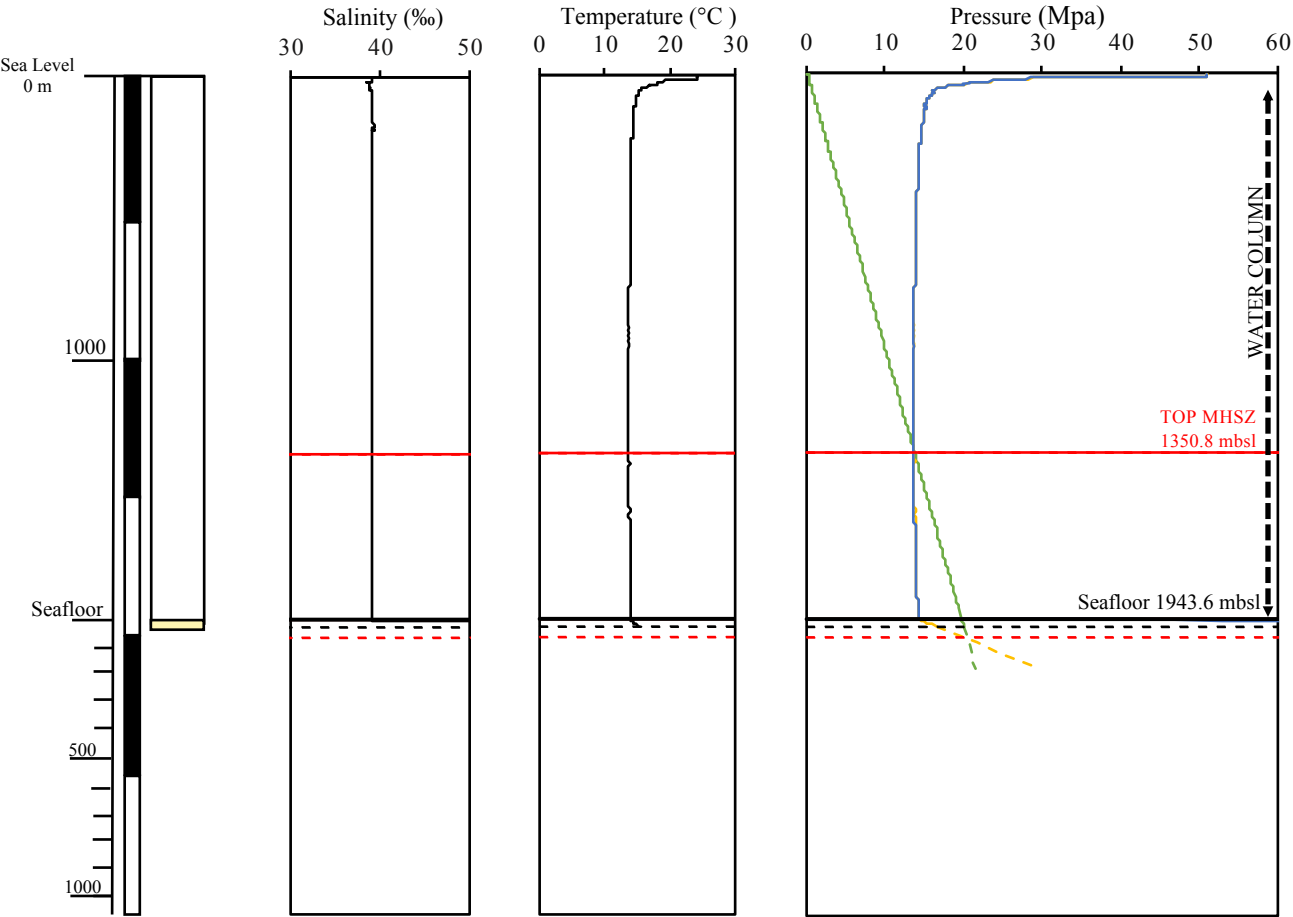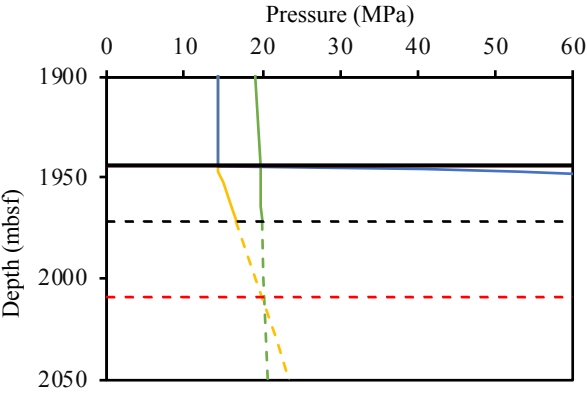

ODP LEG 160  
SITE 972

Mediterranean Ridge  
Water depth: 3930.6 m  
Measured geothermal gradient in borehole : 15.26-28.46 °C/km

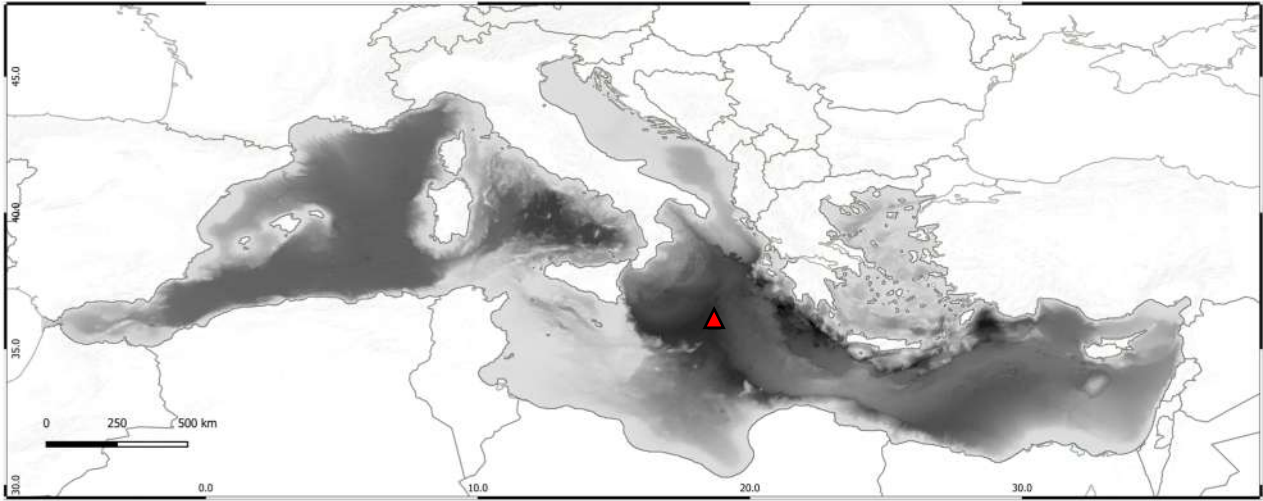

▲ ODP 160 972



| UNIT | LITHOLOGY                                                       | SUBBOTTOM DEPTH | AGE                         |
|------|-----------------------------------------------------------------|-----------------|-----------------------------|
| I    | Nannofossil clay, clayey nannofossil ooze, and nannofossil ooze | 0-95.4          | latest Pliocene to Holocene |

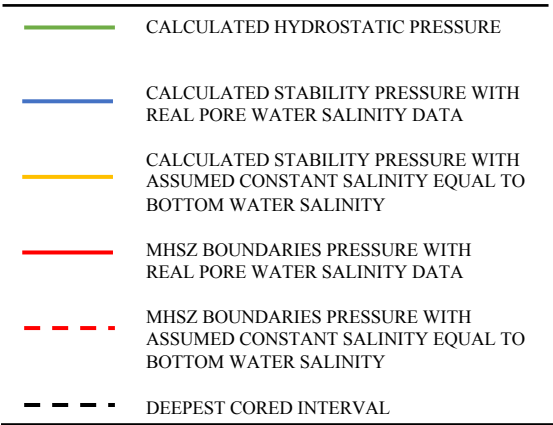



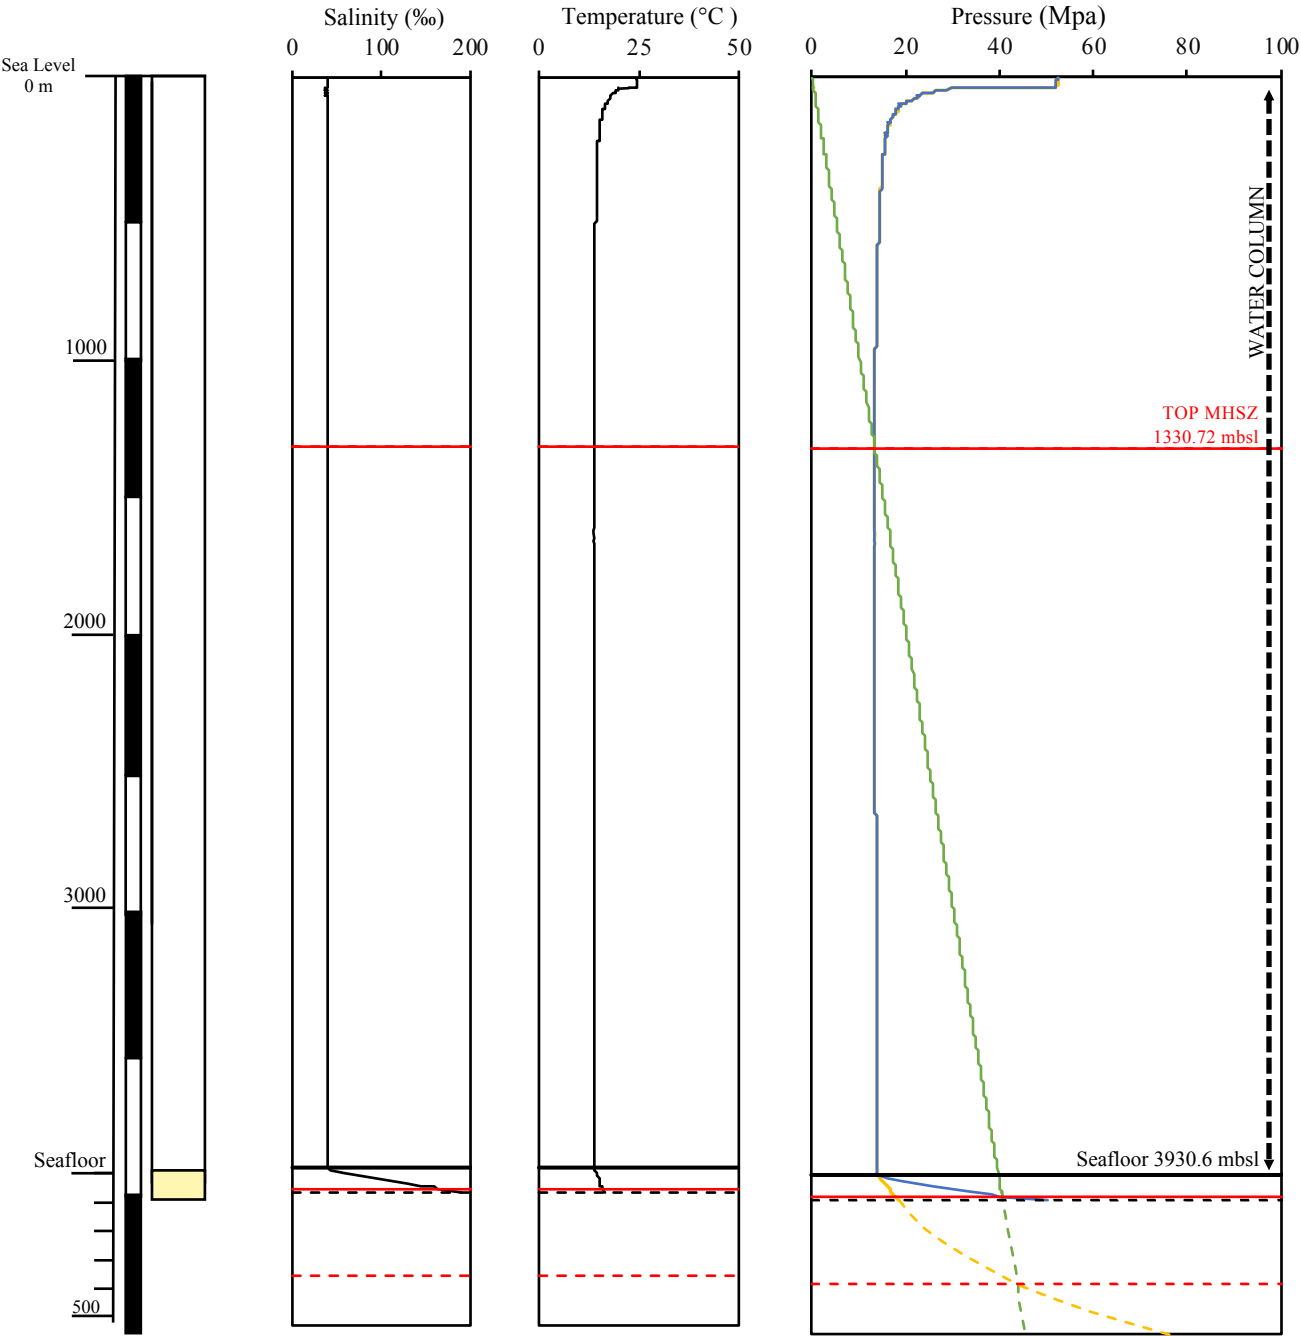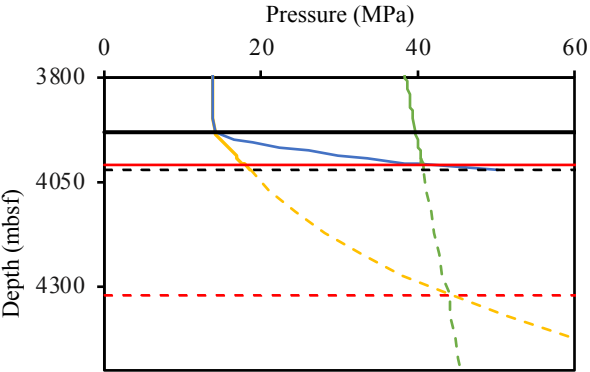

ODP LEG 160  
SITE 973

Mediterranean Ridge  
Water depth: 3695 m  
Measured geothermal gradient in borehole : 19.29-31.45 °C/km

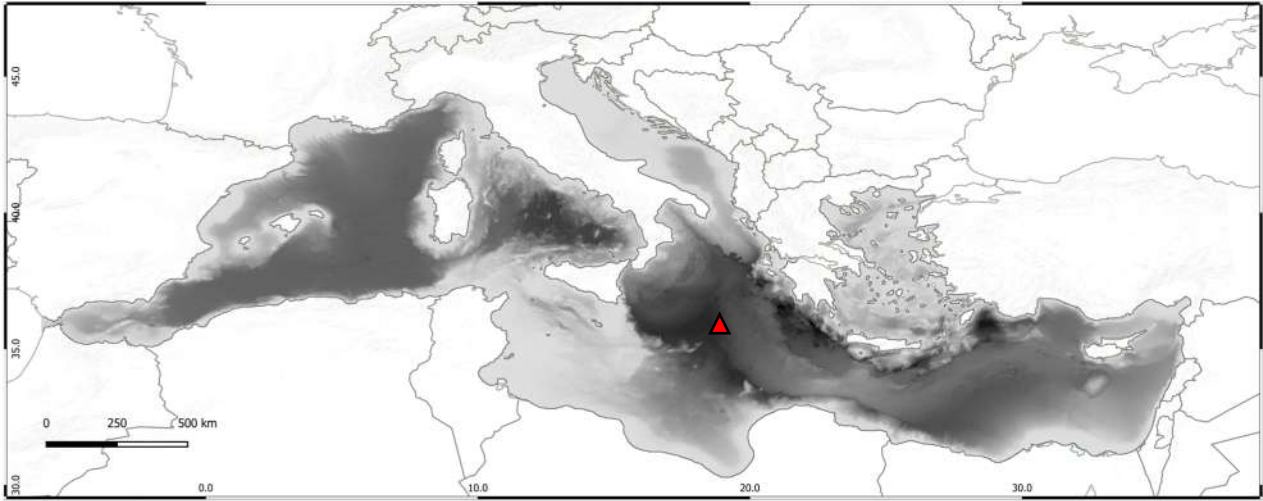

▲ ODP 160 973



| UNIT | LITHOLOGY                                                                           | SUBBOTTOM DEPTH | AGE                       |
|------|-------------------------------------------------------------------------------------|-----------------|---------------------------|
| I    | Nannofossil ooze, clayey nannofossil ooze, sands, silts, clays, and mixed sediments | 0-62.4          | late Pliocene to Holocene |
| II   | Clayey nannofossil ooze                                                             | 140-152.6       | early-late Pliocene       |

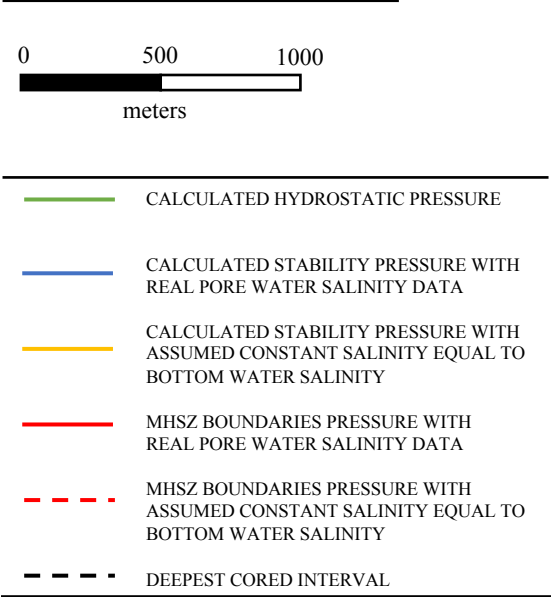

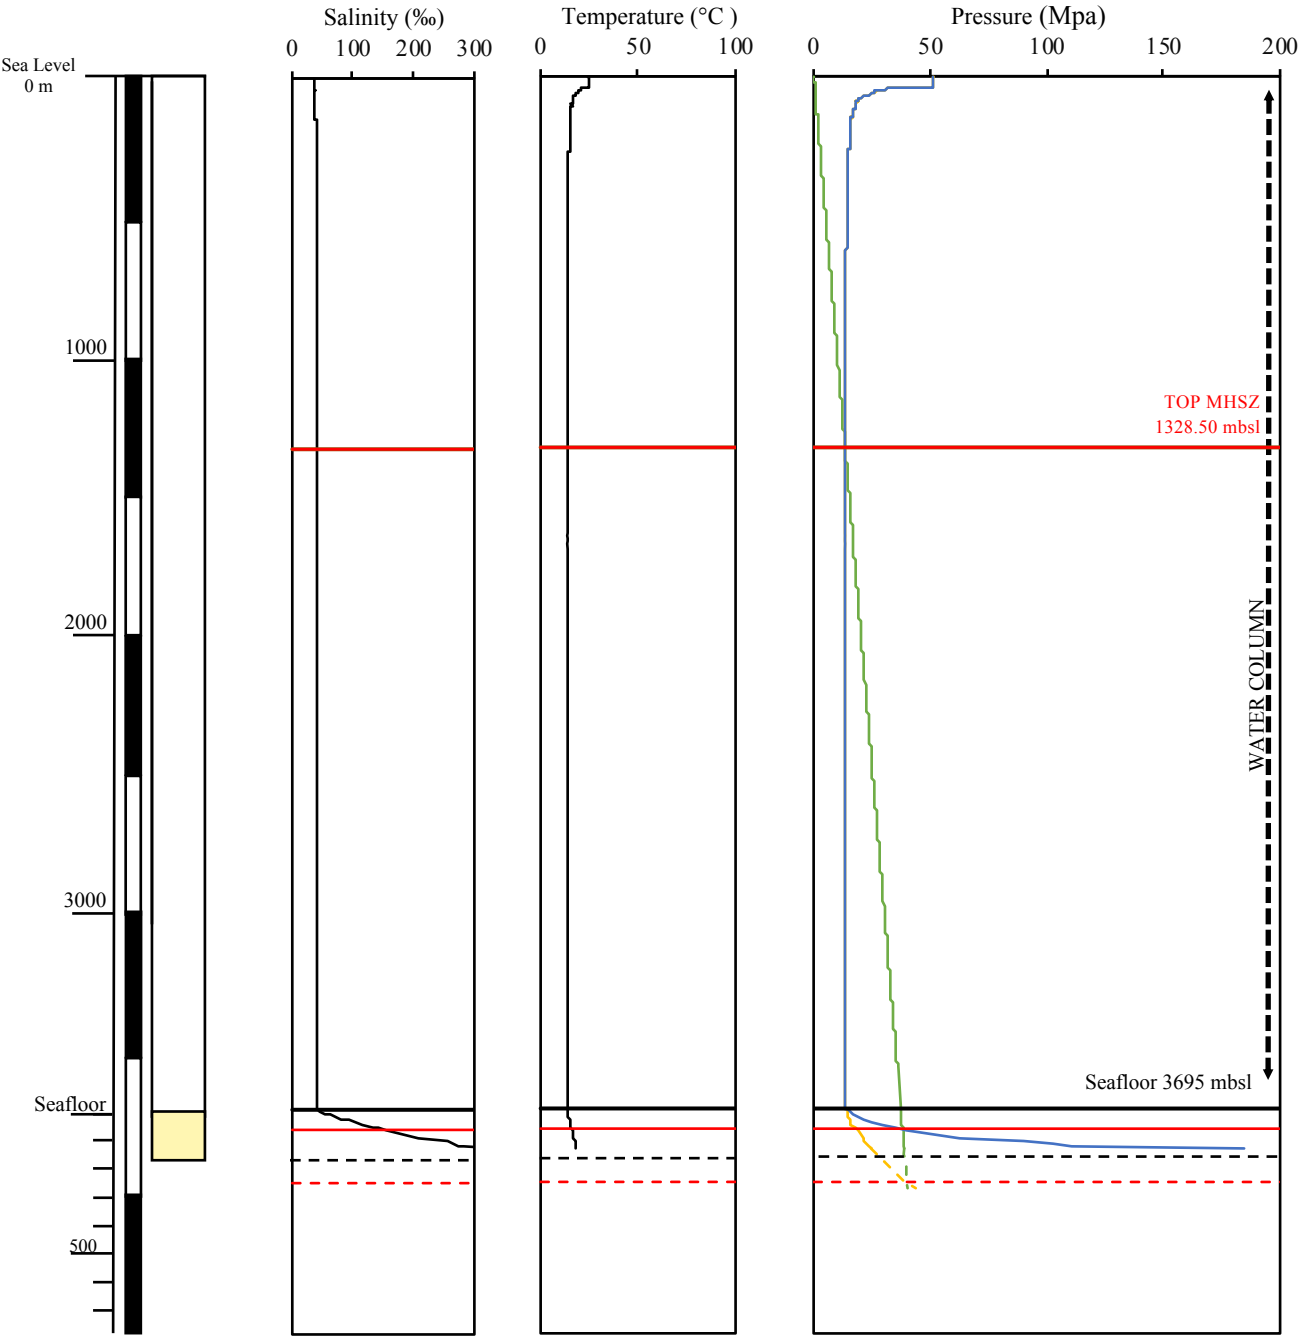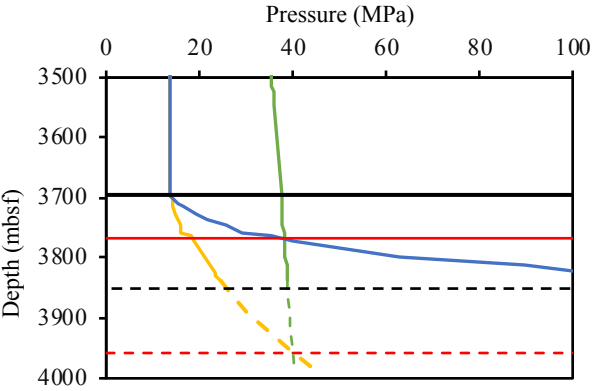

ODP LEG 161  
SITE 974

Tyrrhenian Sea  
Water depth: 3453.9 m  
Measured geothermal gradient in borehole : 132.67°C/km

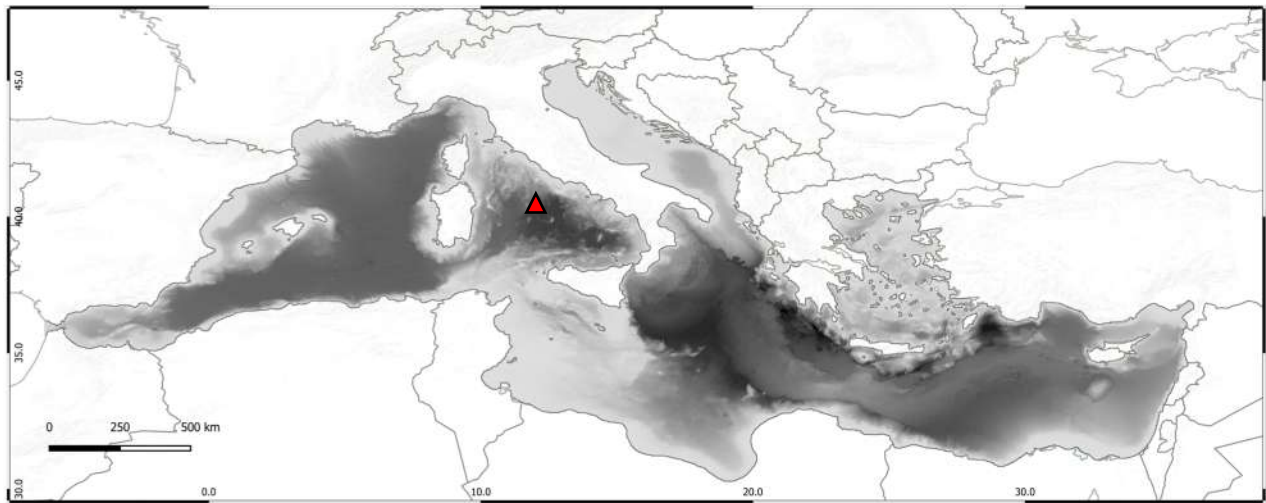

▲ ODP 161 974

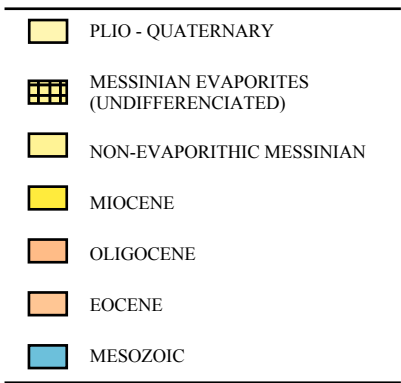

| UNIT | LITHOLOGY                                                                                                  | SUBBOTTOM DEPTH | AGE                     |
|------|------------------------------------------------------------------------------------------------------------|-----------------|-------------------------|
| I    | Nannofossil-rich clay to nannofossil-rich silty clay with minor nannofossil clay                           | 0-90.1          | Pliocene to Pleistocene |
| II   | e light olive grey to pale olive nannofossil clay and nannofossil ooze with a minor amount of foraminifers | 90.1-200.32     | Pliocene                |
| III  | Clay, calcareous silty clay, silt, and sand                                                                | 200.32-202.48   | Miocene                 |

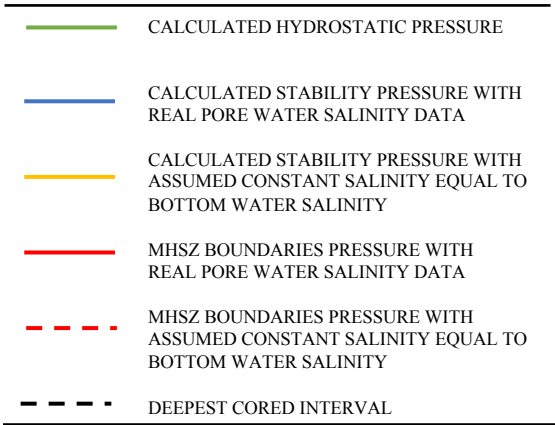

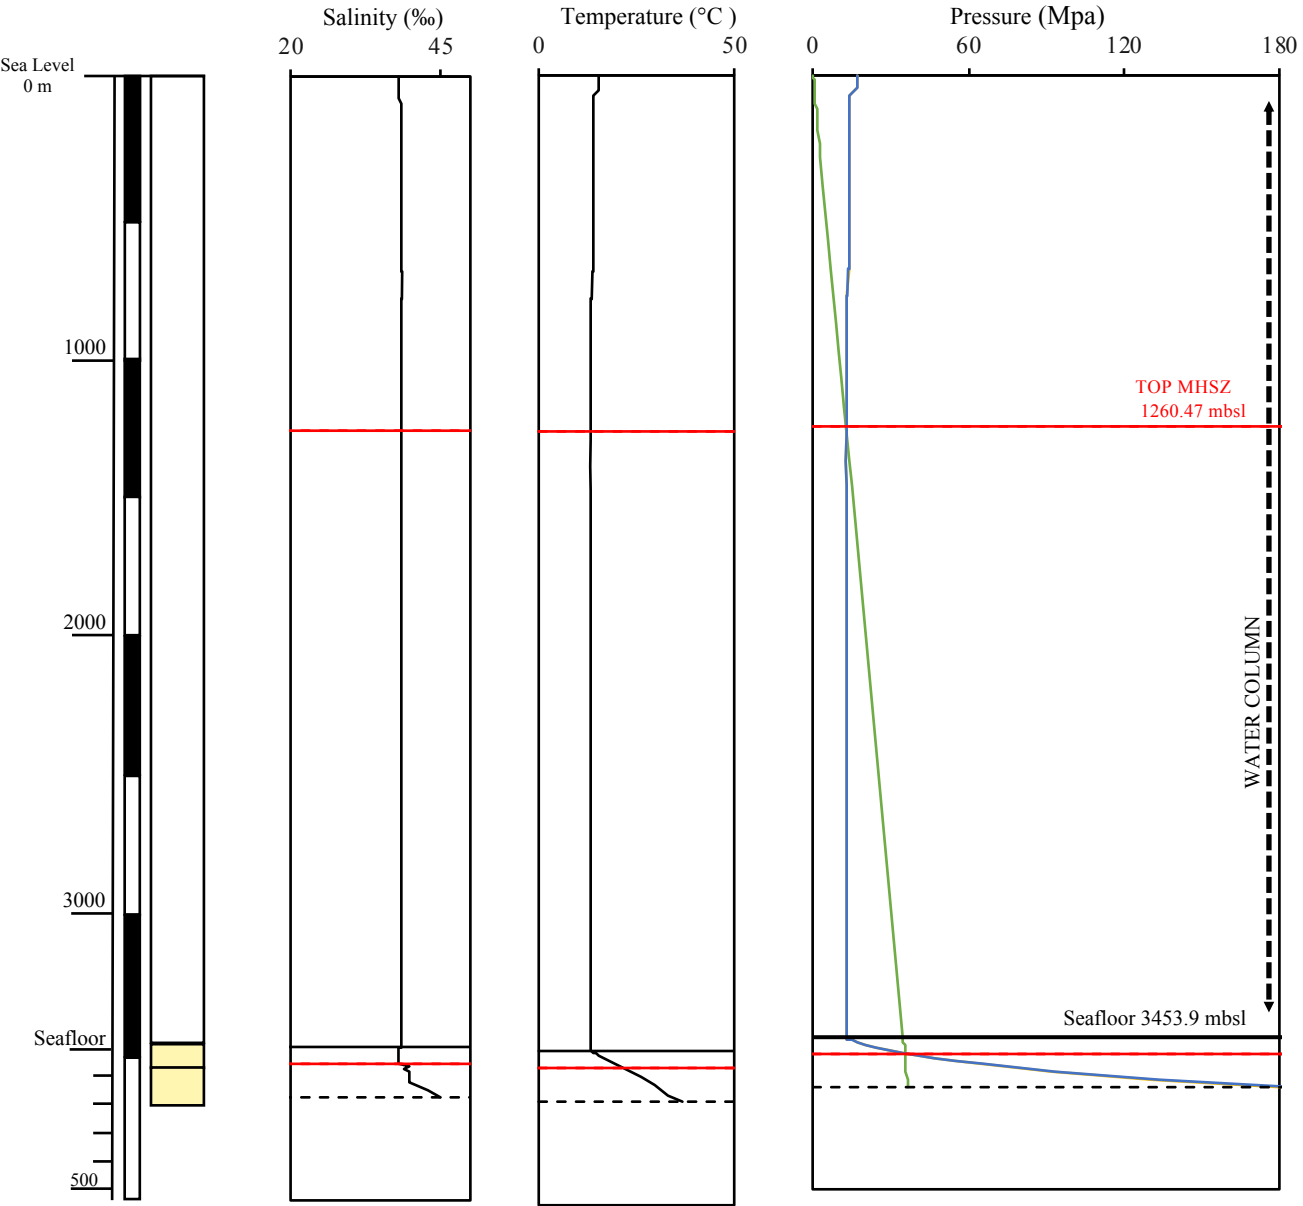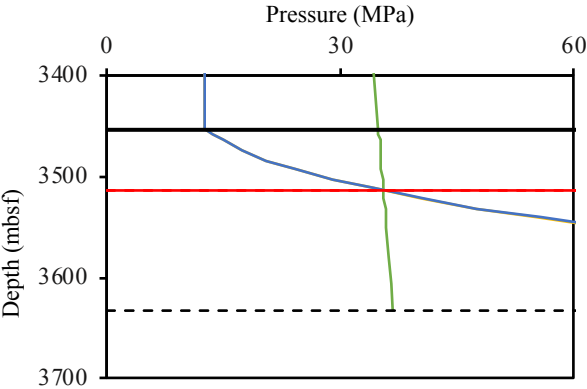

ODP LEG 161  
SITE 975

South Balearic Margin  
Water depth: 2415.5 m  
Measured geothermal gradient in borehole : 65.71°C/km

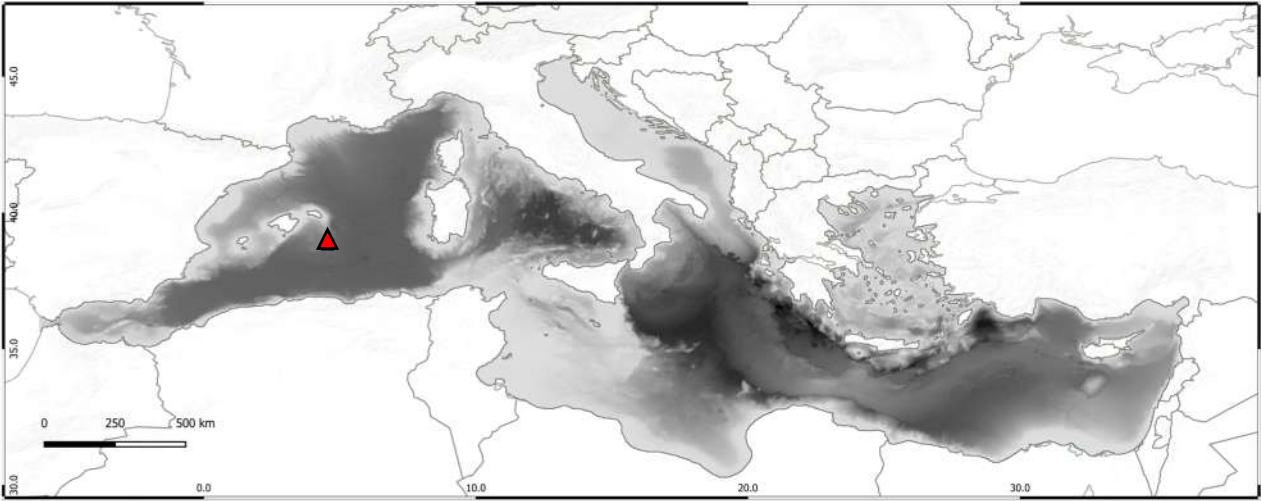

▲ ODP 161 975

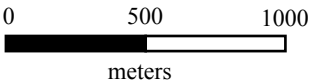

| UNIT | LITHOLOGY                                                                                                                       | SUBBOTTOM DEPTH | AGE                             |
|------|---------------------------------------------------------------------------------------------------------------------------------|-----------------|---------------------------------|
| I    | Nannofossil or calcareous clay (-60% of the section), nannofossil or calcareous silty clay (-20%), and nannofossil ooze (-20%). | 0-305.2         | Pleistocene to Pliocene-Miocene |
| II   | yellowish gray micrite and greenish gray, micritic silty clay                                                                   | 305.2-306.97    | Pliocene-Miocene                |
| III  | Gypsum and gypsiferous chalk                                                                                                    | 306.97- 317.1   | Messinian                       |

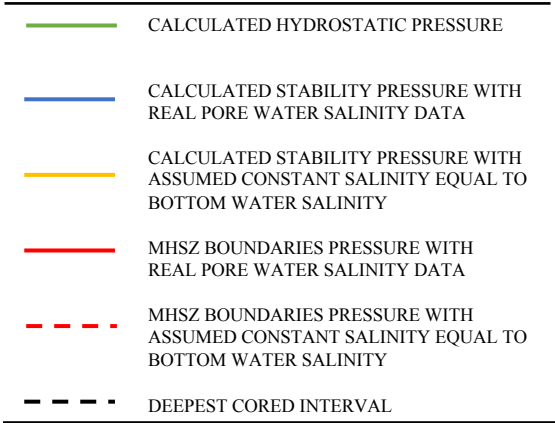

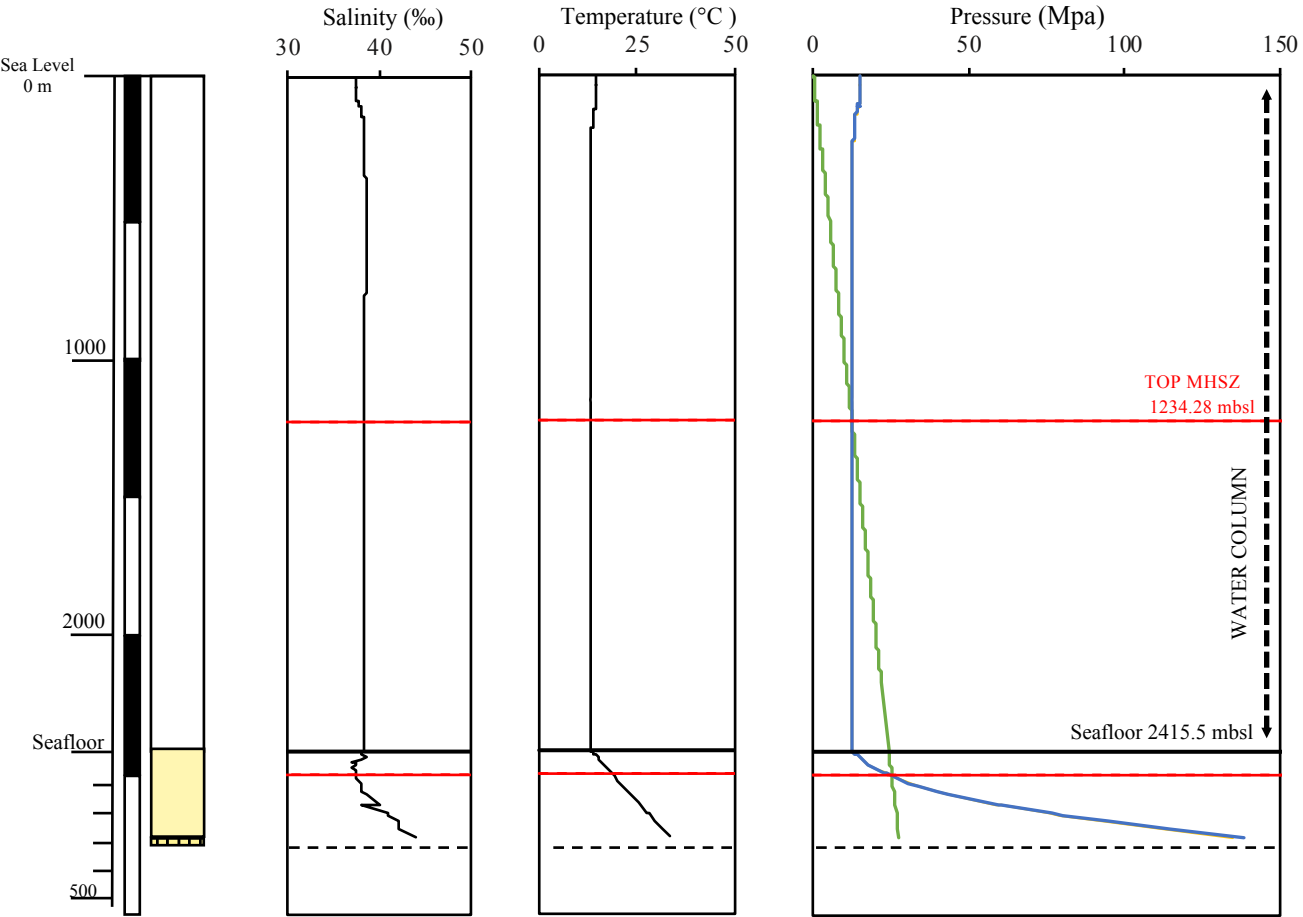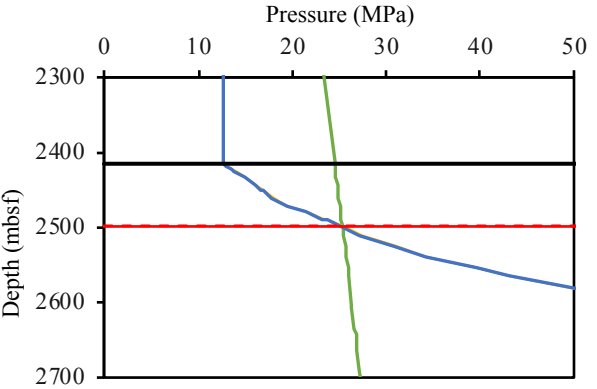

ODP LEG 161  
SITE 976

Alboran Sea  
Water depth: 1107.93 m  
Measured geothermal gradient in borehole : 76.02°C/km

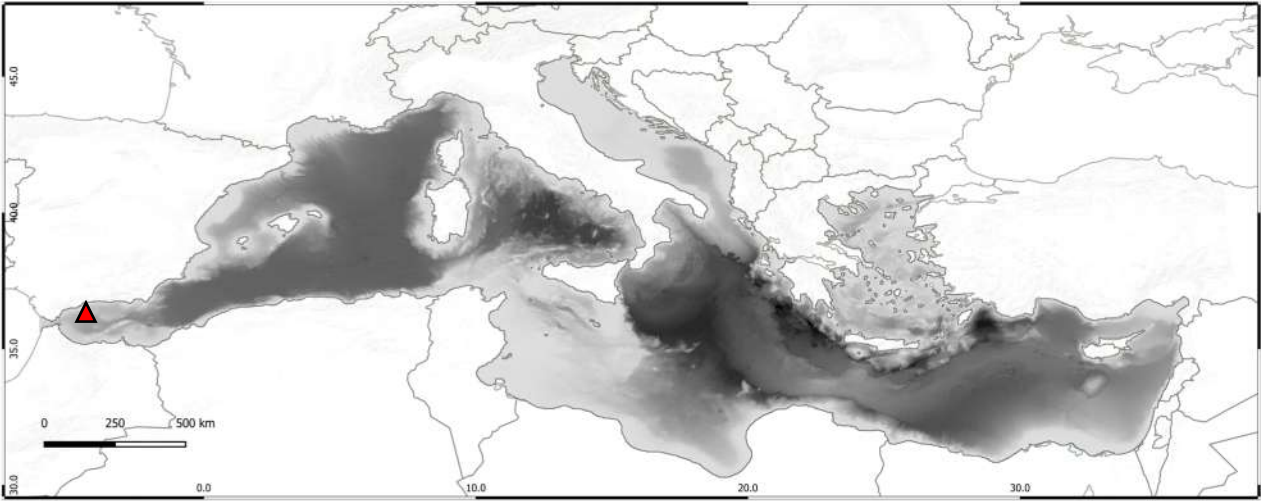

▲ ODP 161 976



| UNIT | LITHOLOGY                                                                    | SUBBOTTOM DEPTH | AGE                                   |
|------|------------------------------------------------------------------------------|-----------------|---------------------------------------|
| I    | Nannofossil-rich clay, nannofossil clay, and Pliocene nannofossil silty clay | 0.0-362.1       | Pleistocene to late Pliocene          |
| II   | Sand and nannofossil clay                                                    | 362.1-518.3     | Late pliocene                         |
| III  | Nannofossil and nannofossil-rich clay and claystone                          | 518.3-660.2     | Early late Pliocene to middle Miocene |
| IV   | Glauconite, calcitic and zeolitic sand, and pebbly sand                      | 660.20-669.73   | Middle Miocene                        |

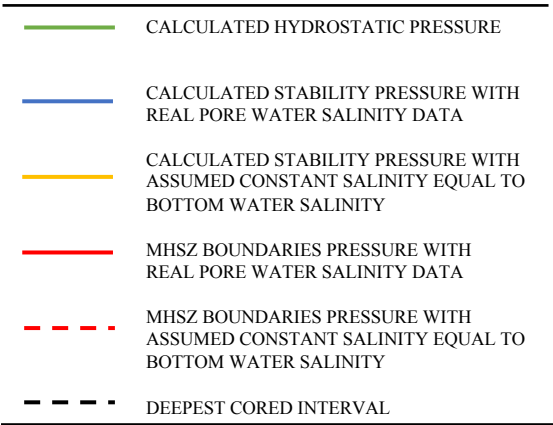



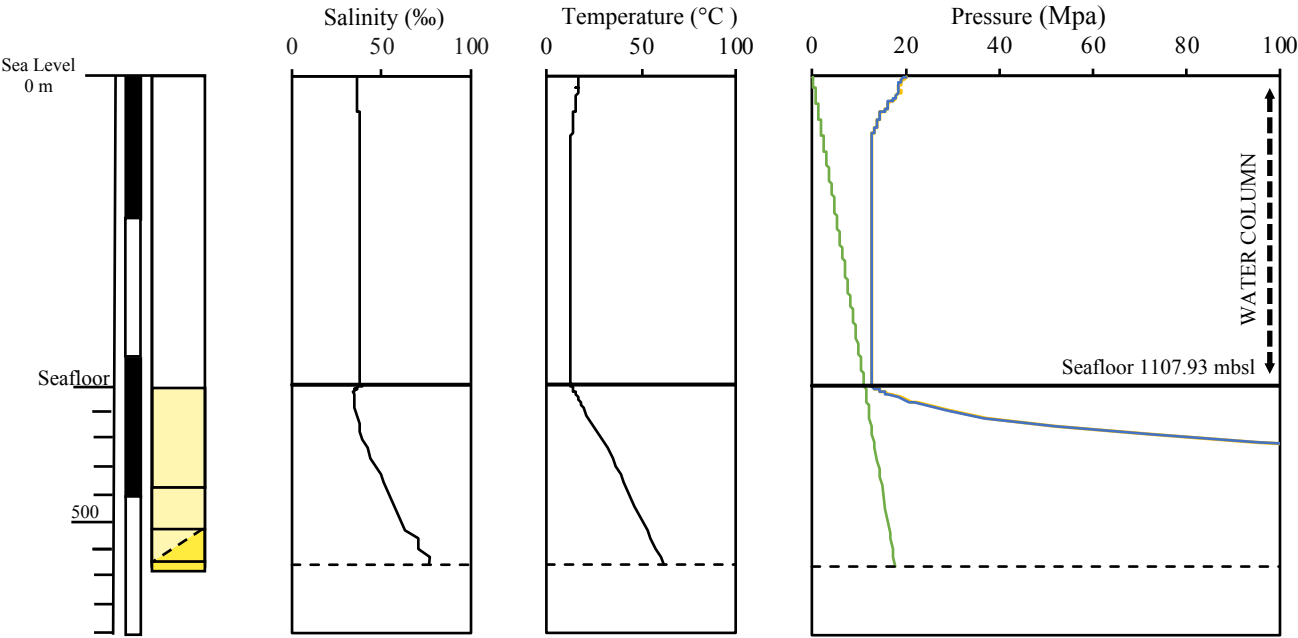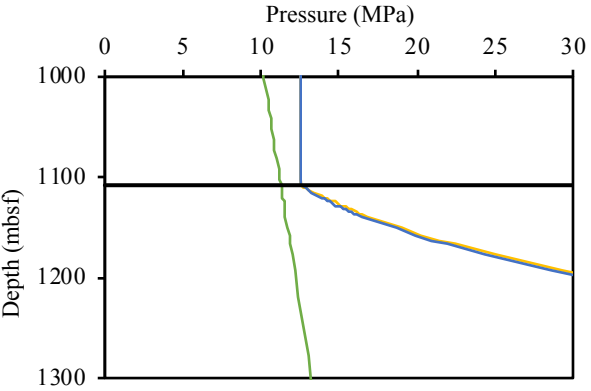

ODP LEG 161  
SITE 977

Alboran Sea  
Water depth: 1984 m  
Measured geothermal gradient in borehole : 83.38°C/km

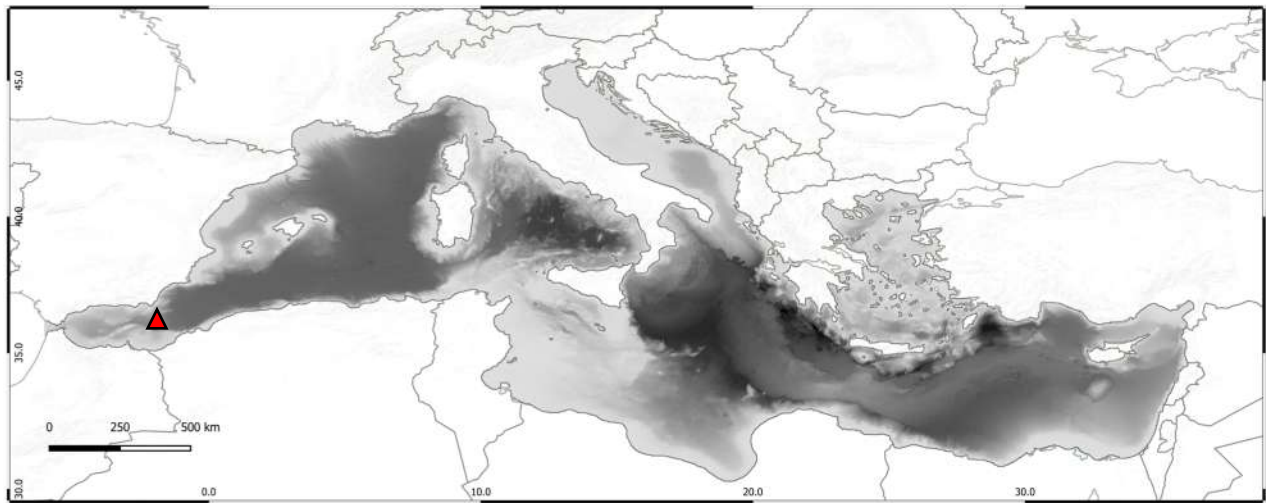

▲ ODP 161 977



| UNIT | LITHOLOGY                                                          | SUBBOTTOM DEPTH | AGE                             |
|------|--------------------------------------------------------------------|-----------------|---------------------------------|
| I    | nannofossil-rich to nannofossil and calcareous silty clay and clay | 0.0-32.9        | Pleistocene to early Pliocene   |
| IB   | Nannofossil clay<br>Calcareous silty clay to clay                  | 417.4-490.6     | early Pliocene to late Pliocene |
| IC   | Nannofossil clay<br>Calcareous silty clay to clay                  | 490.8-532.9     | early Pliocene                  |
| II   | Partly cemented sand to gravel                                     | 532.9-598.5     | Miocene to early Pliocene       |

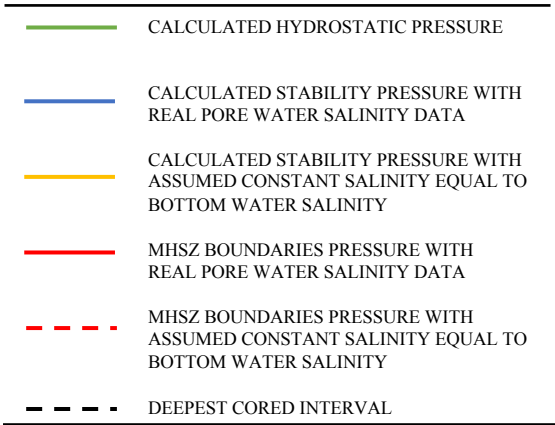

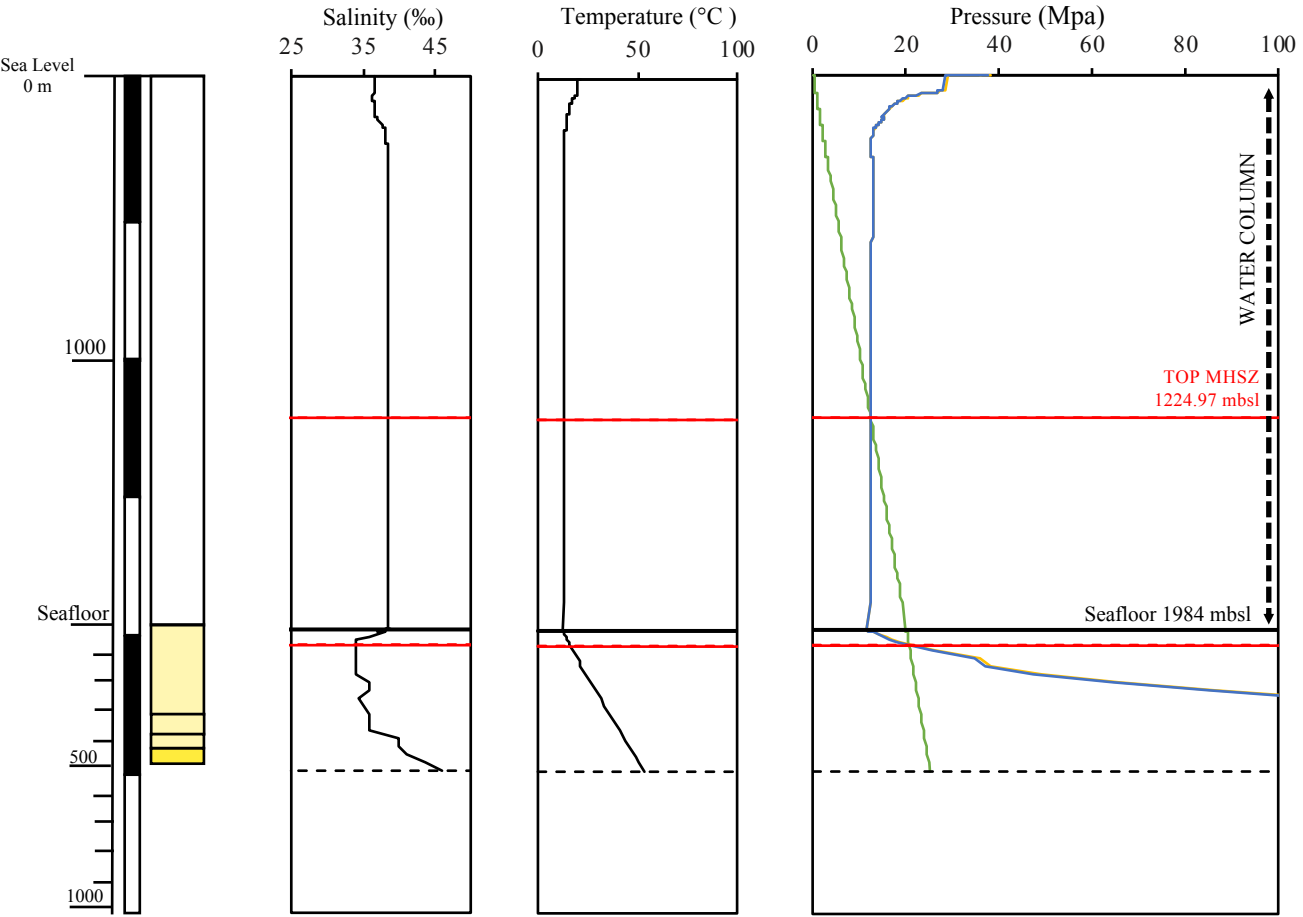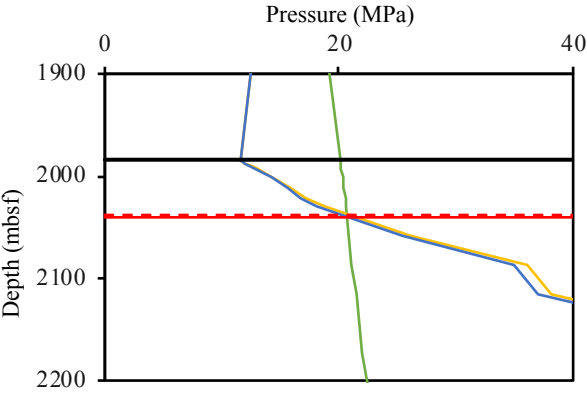

ODP LEG 161  
SITE 978

Alboran Sea  
Water depth: 1929.4 m  
Measured geothermal gradient in borehole : 87.79°C/km

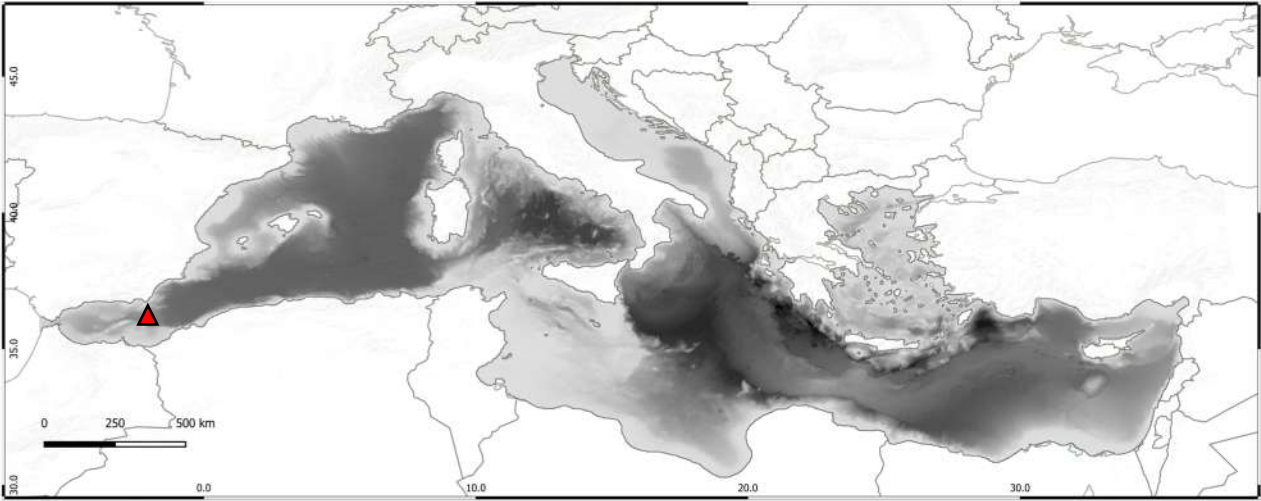

▲ ODP 161 978

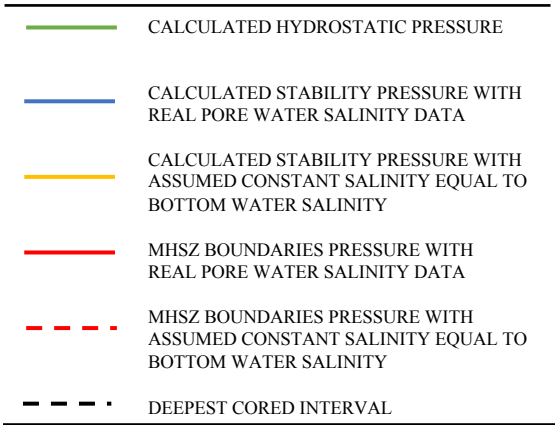

| UNIT | LITHOLOGY                                                                                                                                                                      | SUBBOTTOM DEPTH | AGE                             |
|------|--------------------------------------------------------------------------------------------------------------------------------------------------------------------------------|-----------------|---------------------------------|
| I    | Nannofossil clay                                                                                                                                                               | 213.0-620.9     | Pleistocene to Pliocene         |
| IA   | Nannofossil clay                                                                                                                                                               | 213.0-342.2     | Pleistocene to Pliocene         |
| IB   | Nannofossil clay<br>Calcareous silty clay to clay                                                                                                                              | 342.2-409.3     | early Pliocene                  |
| IC   | Nannofossil claystone, calcareous claystone, calcareous silty claystone                                                                                                        | 409.3-620.9     | Early Pliocene to late Pliocene |
| II   | Pebbles of volcanic and sedimentary rocks                                                                                                                                      | 620.9-630.67    | Early Pliocene to?              |
| III  | Calcareous siltstone, calcareous silty claystone, calcareous silty sandstone, silty claystone, claystone, clayey silty sandstone, clayey sandstone, nannofossil-rich claystone | 630.67-694.3    | Miocene                         |

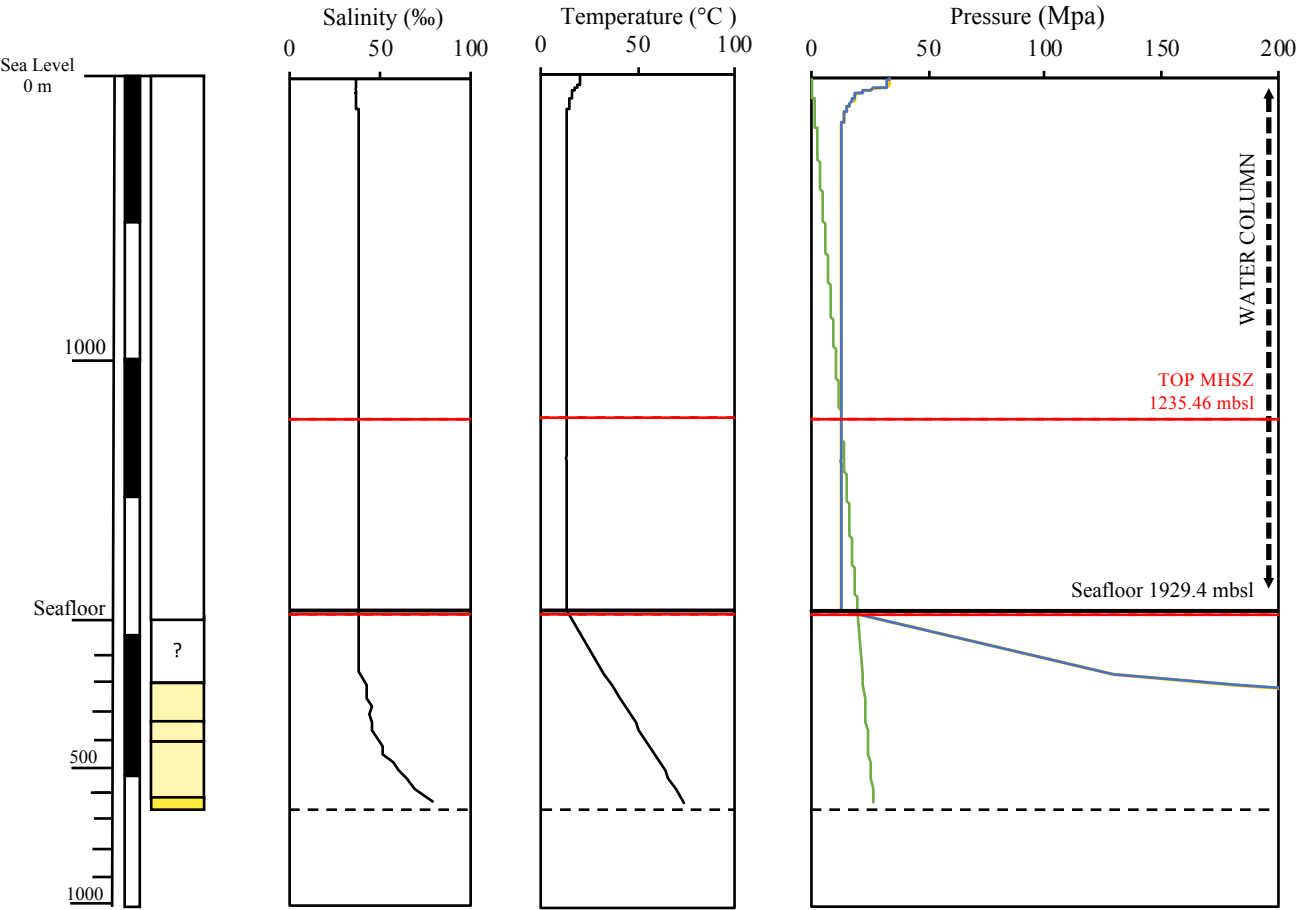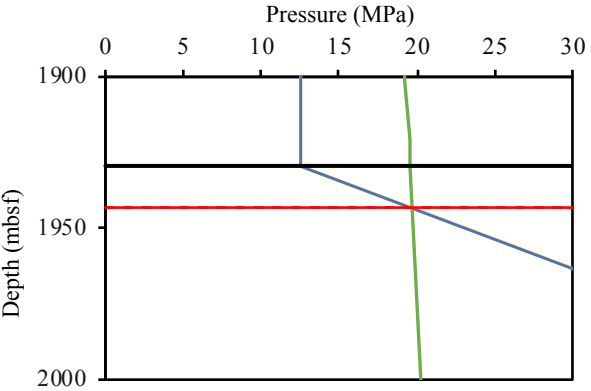

ODP LEG 161  
SITE 979

Alboran Sea  
Water depth: 1062.1 m  
Measured geothermal gradient in borehole : 99.92°C/km

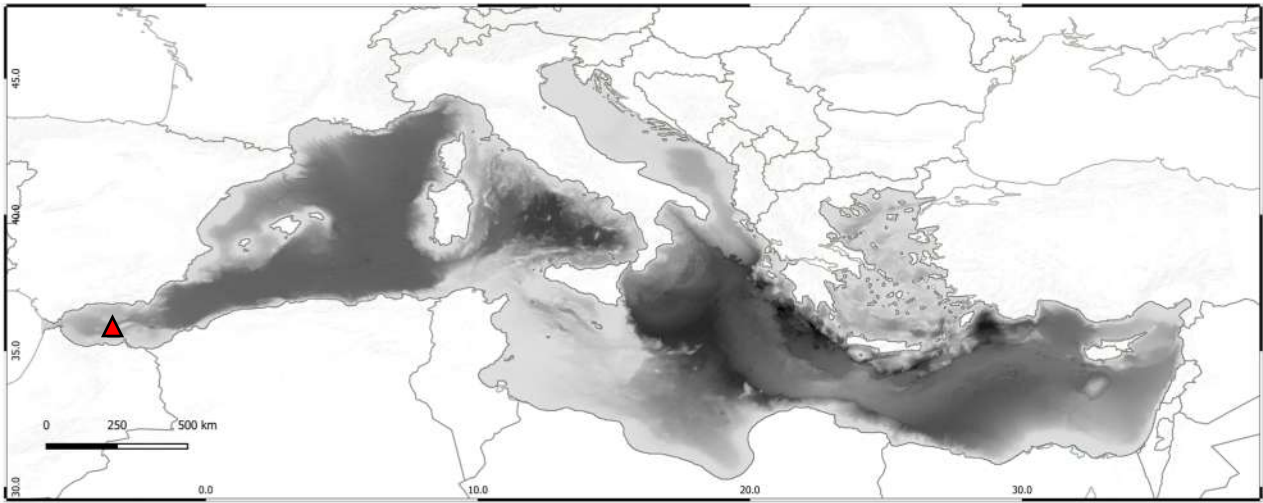

▲ ODP 161 979



| UNIT | LITHOLOGY        | SUBBOTTOM<br>DEPTH | AGE                        |
|------|------------------|--------------------|----------------------------|
| I    | Nannofossil clay | 0.0-580.9          | Pleistocene to<br>Pliocene |

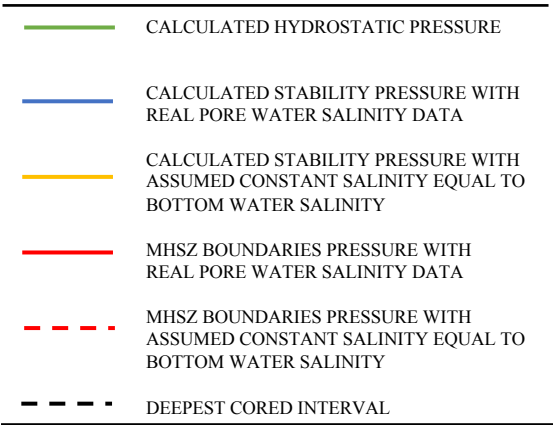

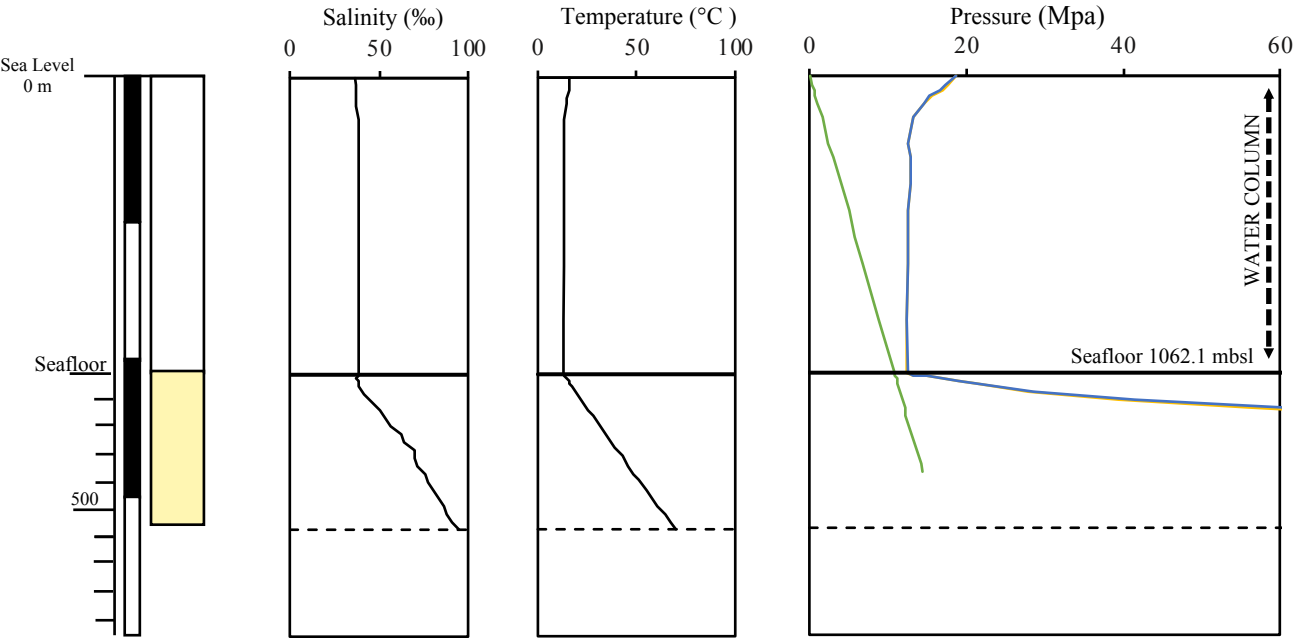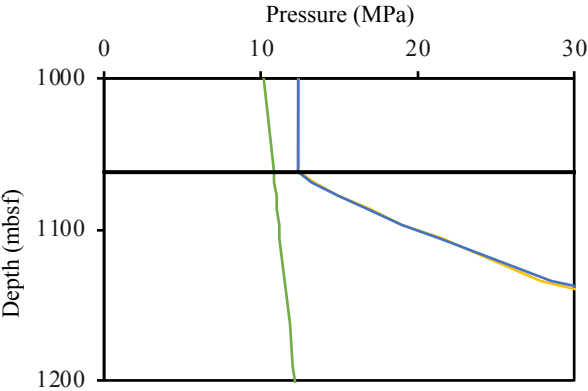

ODP LEG 107  
SITE 650

Marsili Basin  
Water depth: 3529.0 m  
Measured geothermal gradient in borehole : 143.078°C/km

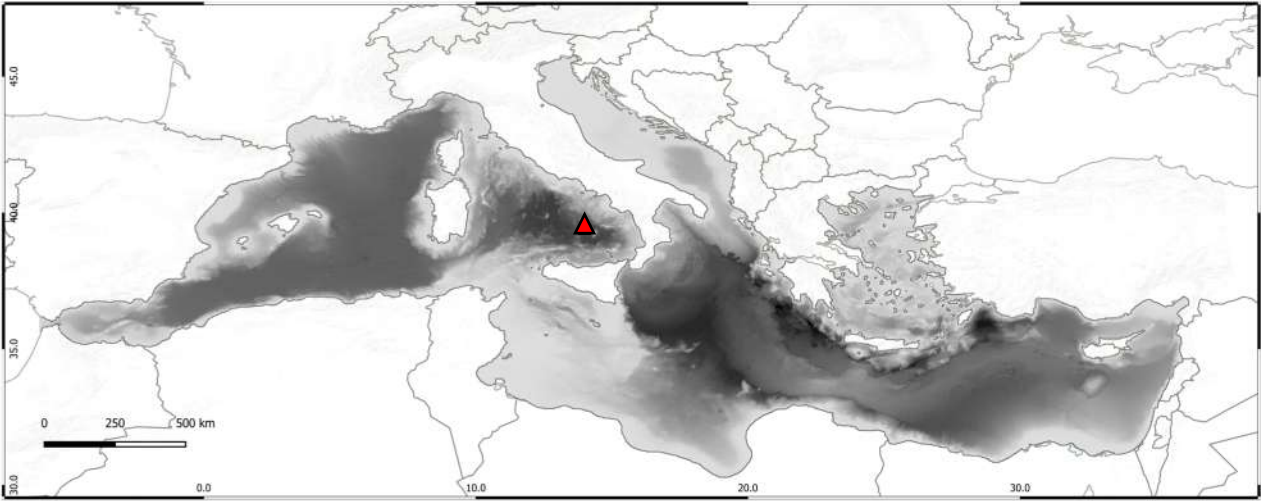

▲ ODP 107 650

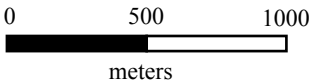

| UNIT | LITHOLOGY                                                  | SUBBOTTOM DEPTH | AGE                           |
|------|------------------------------------------------------------|-----------------|-------------------------------|
| I    | Volcanic glass, pumice and clay-sized terrigenous material | 0-354           | Pleistocene-Holocene          |
| II   | Calcareous mud and nannofossil ooze                        | 354-602         | Pleistocene to upper Pliocene |

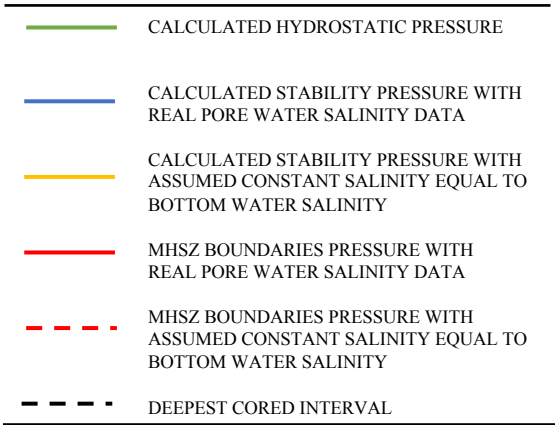



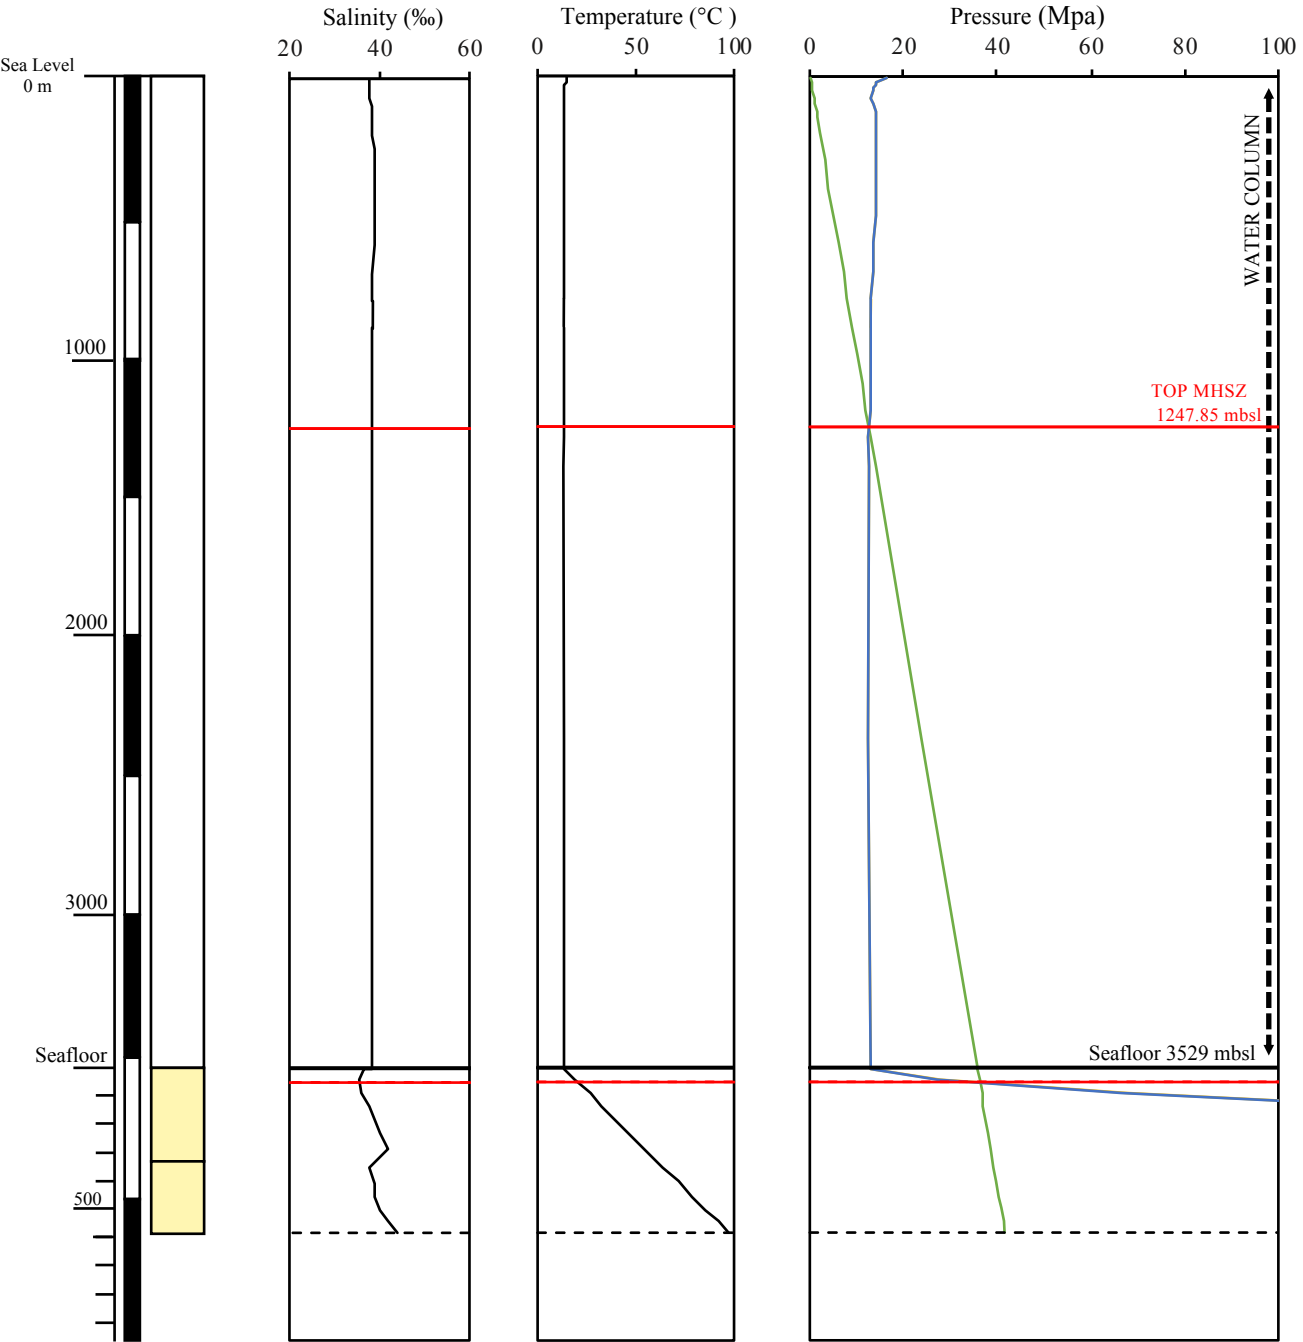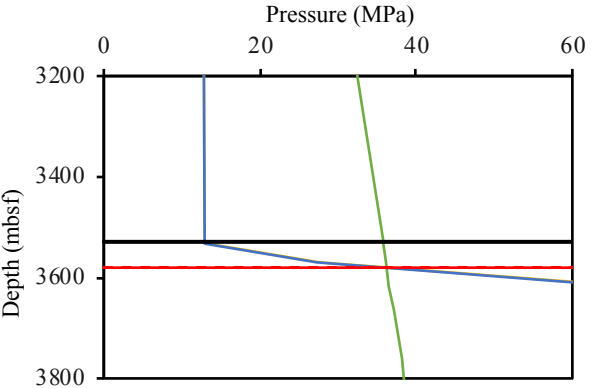

ODP LEG 107  
SITE 651

Tyrrhenian sea  
Water depth: 3590.90 m  
Measured geothermal gradient in borehole : 104.40°C/km

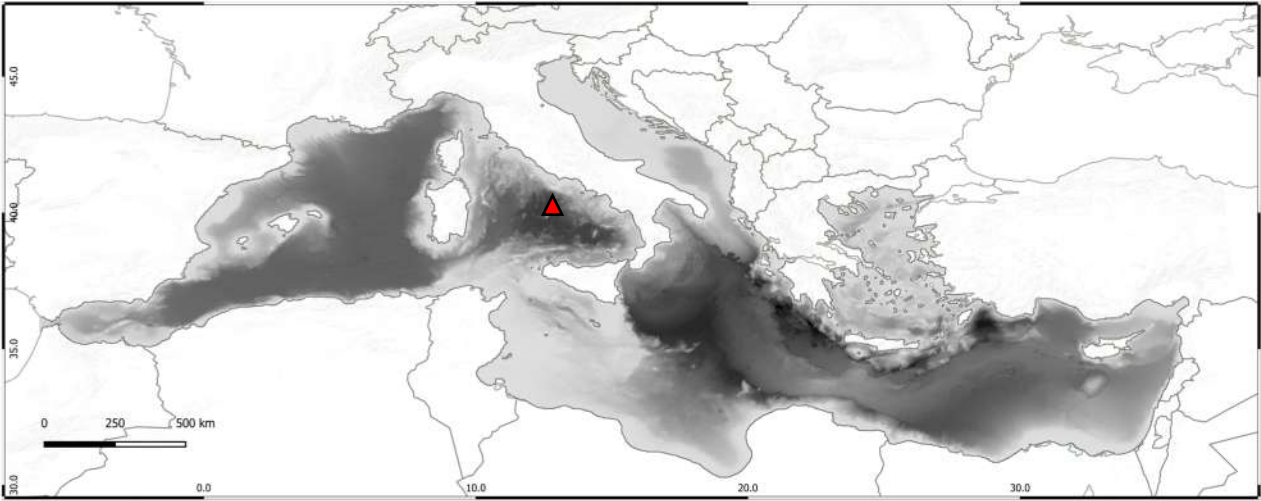

▲ ODP 107 651



| UNIT | LITHOLOGY                                                                                             | SUBBOTTOM DEPTH | AGE                          |
|------|-------------------------------------------------------------------------------------------------------|-----------------|------------------------------|
| I    | Volcanogenic sediments interbedded with volumetrically subordinate (< 15%) marly, nannofossilrich mud | 0-136.0         | late Pleistocene             |
| II   | Nannofossil chalk with very subordinate volcanogenic turbiditic claystones and siltstone              | 136.0-387.6     | Pliocene to late Pleistocene |

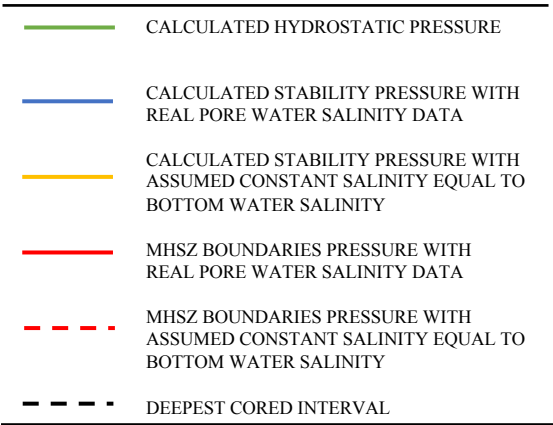

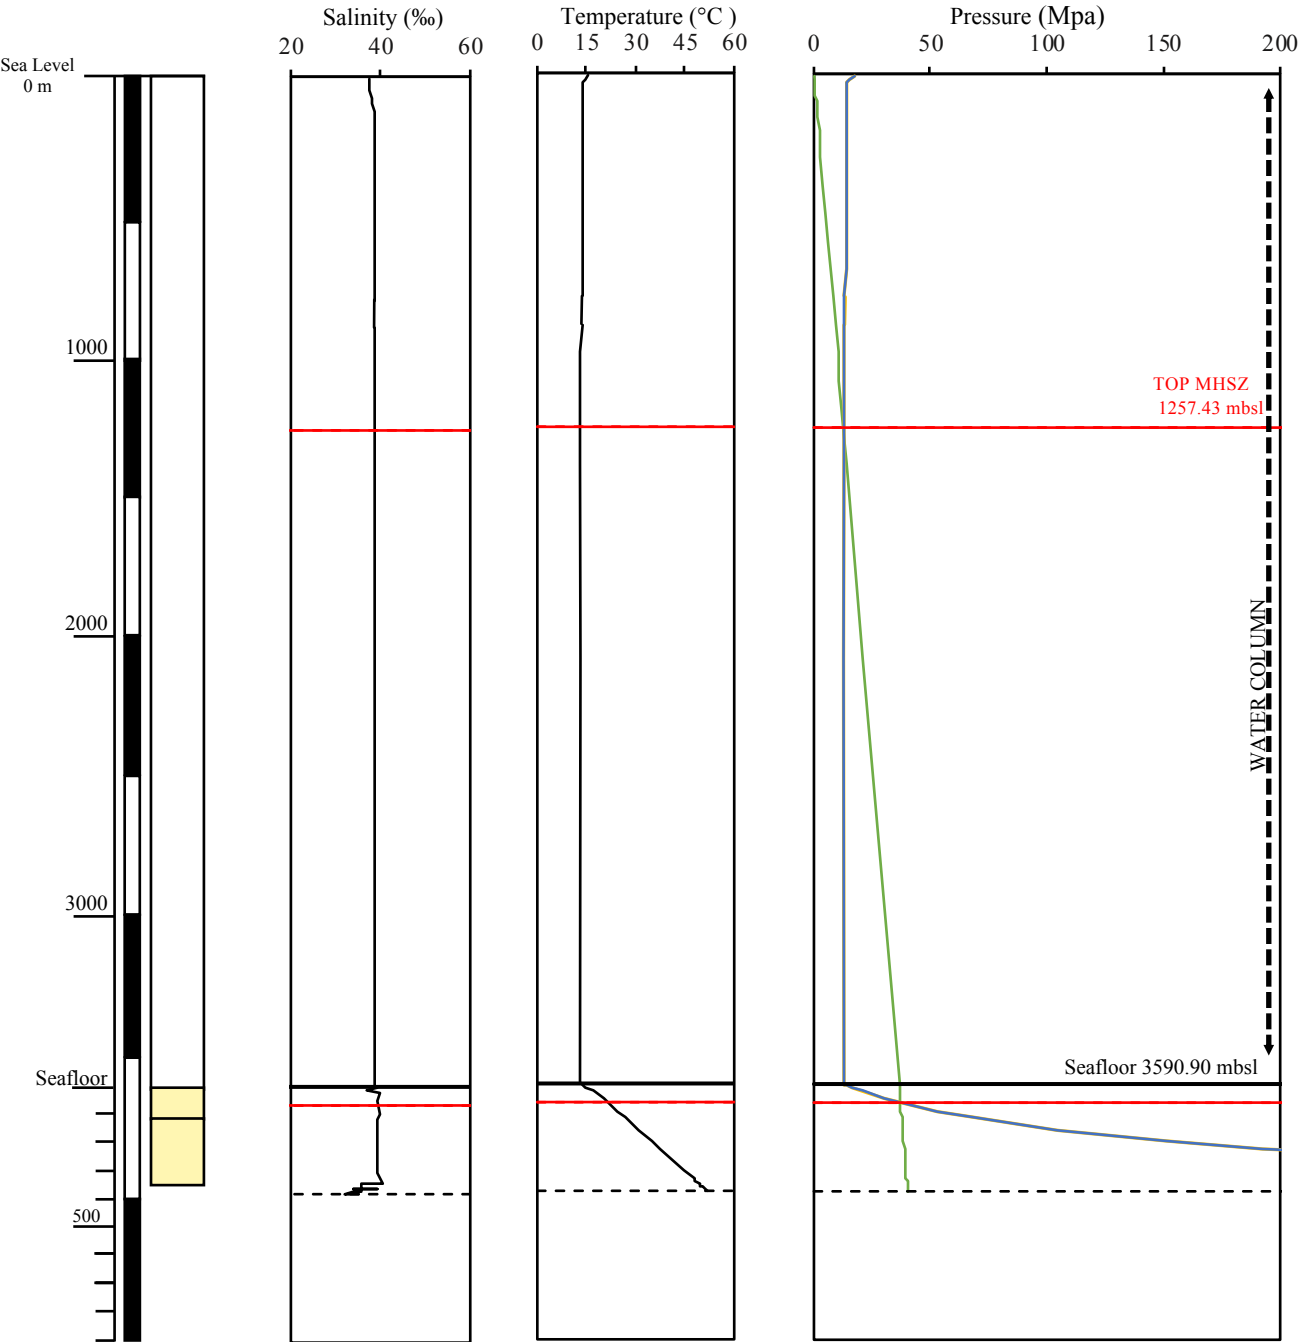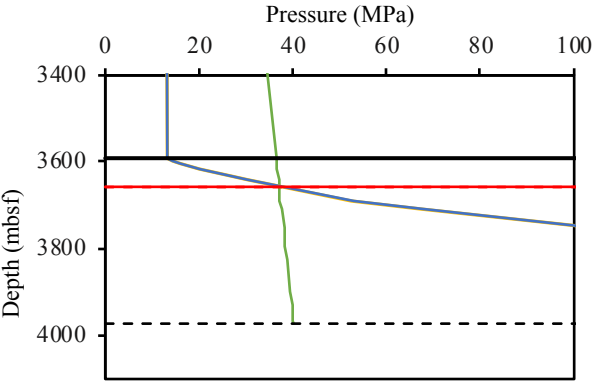

**ODP LEG 107**  
**SITE 652**

Lower Sardinia Margin  
Water depth: 3470.5 m  
Measured geothermal gradient in borehole : 133.726°C/km

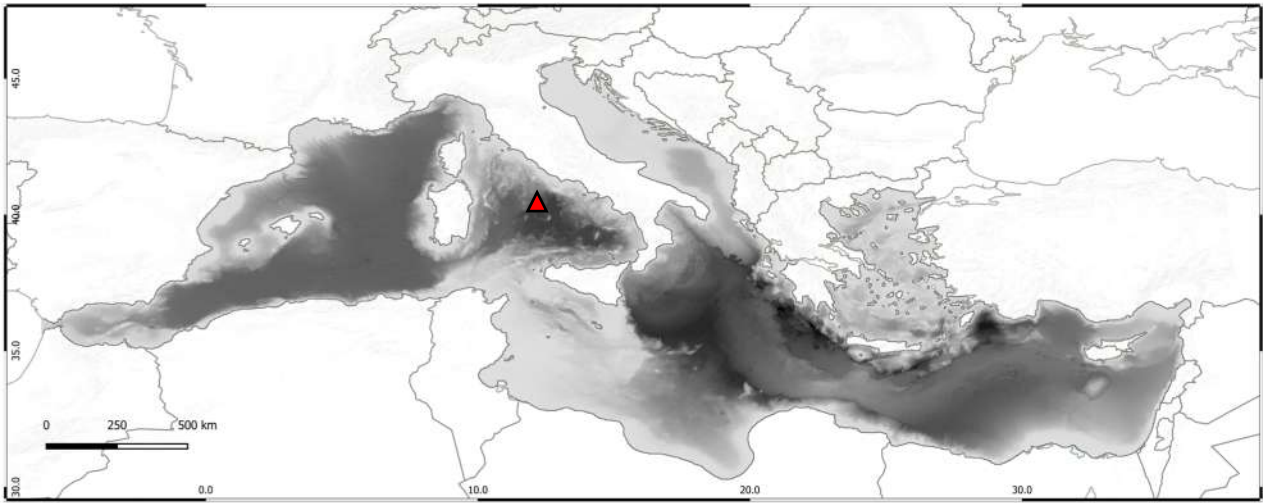

**▲ ODP 107 652**

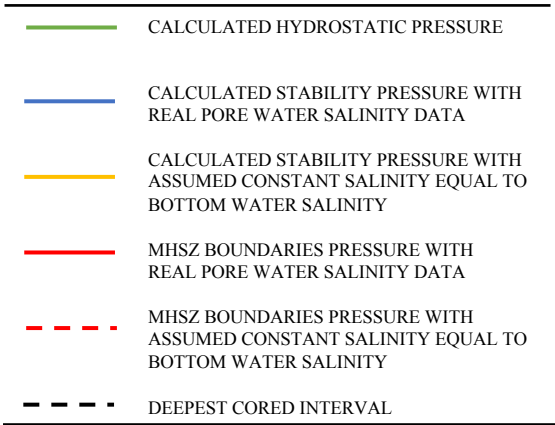

| UNIT | LITHOLOGY                                                                                                              | SUBBOTTOM DEPTH | AGE                                |
|------|------------------------------------------------------------------------------------------------------------------------|-----------------|------------------------------------|
| I    | Gray calcareous muds and muds                                                                                          | 0-55.4          | Pleistocene                        |
| II   | marly nannofossil oozes with higher carbonate content (average 48%) than in Unit I                                     | 55.4-188.2      | early Pleistocene-Pliocene         |
| III  | transitional interval between the normal marine Pliocene and the barren Messinian sediments                            | 188.2 – 188.6   | latest Messinian                   |
| IV   | dominated by gray, thinly-bedded, normally-graded, gypsum- and carbonate-bearing, sandy mud, interpreted as turbidites | 188.6 – 344.3   | probable late Messinian            |
| V    | succession of dark gray, graded and cross-bedded, gypsum- and carbonate-bearing sandy muds                             | 344.8 – 721.1   | undetermined (probable Messinian). |

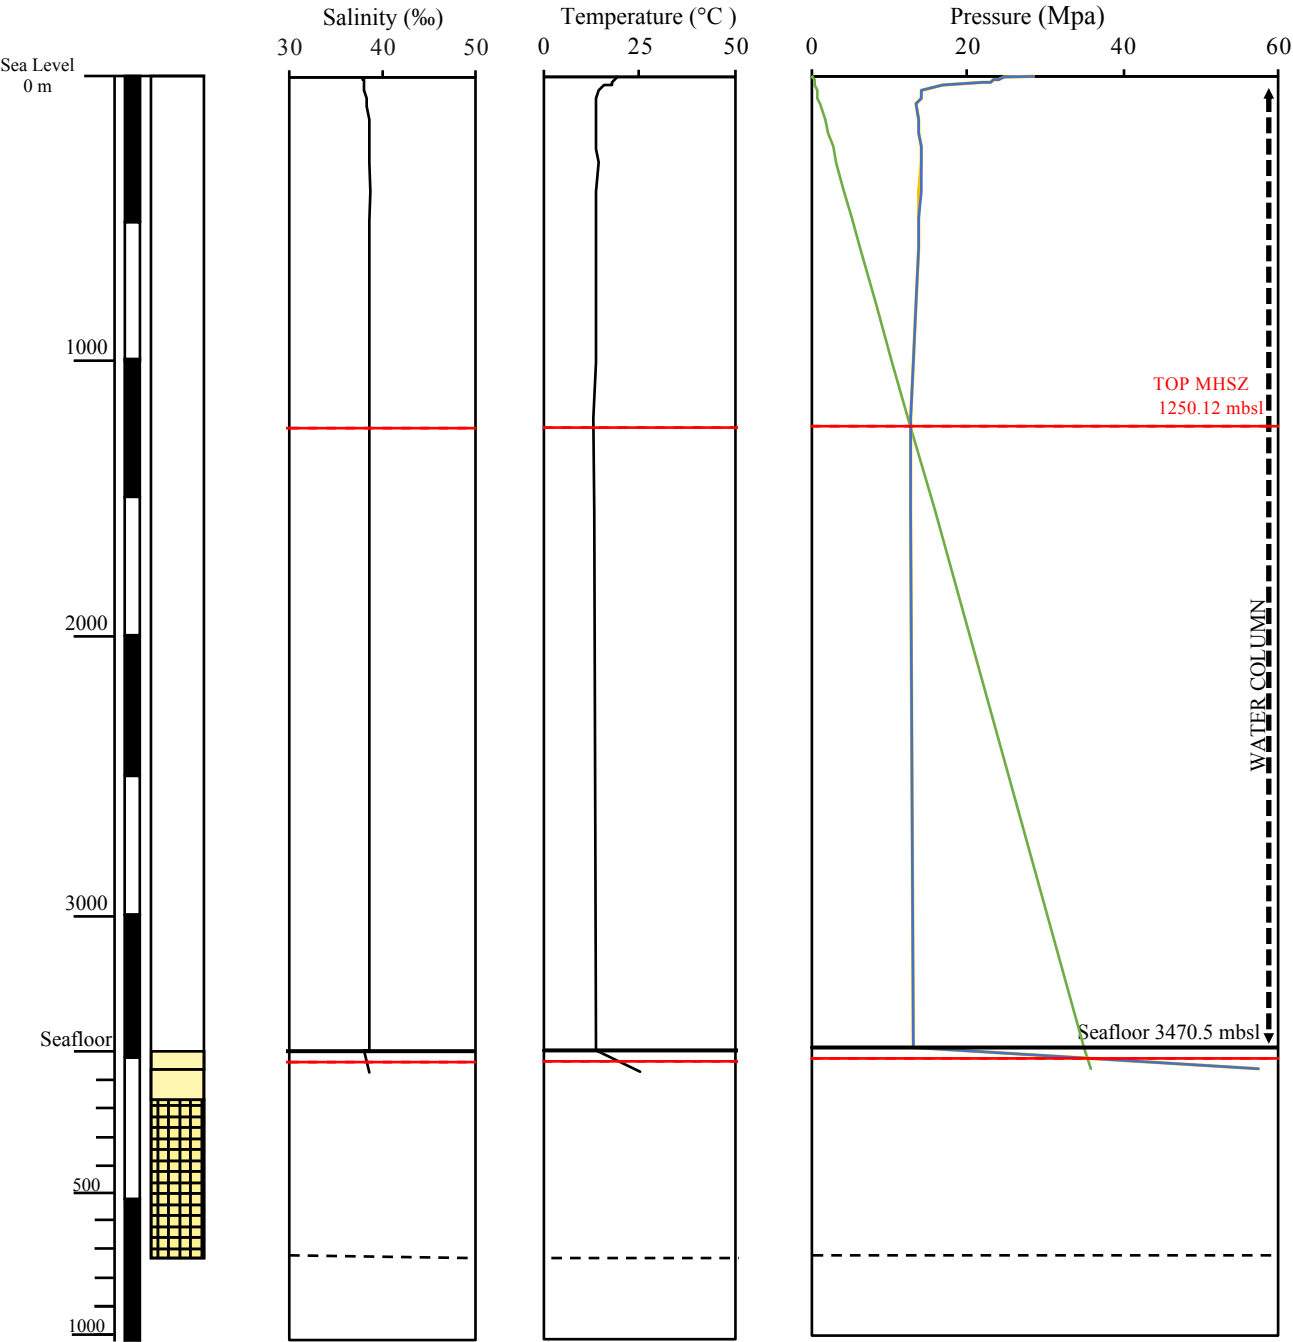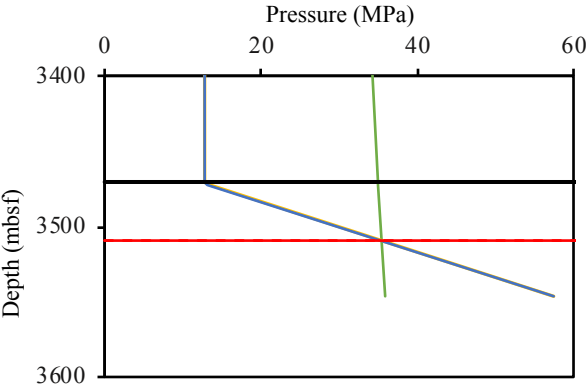

ODP LEG 107  
SITE 653

Corniglia Terrace  
Water depth: 2831.60 m  
Measured geothermal gradient in borehole : 93.42°C/km

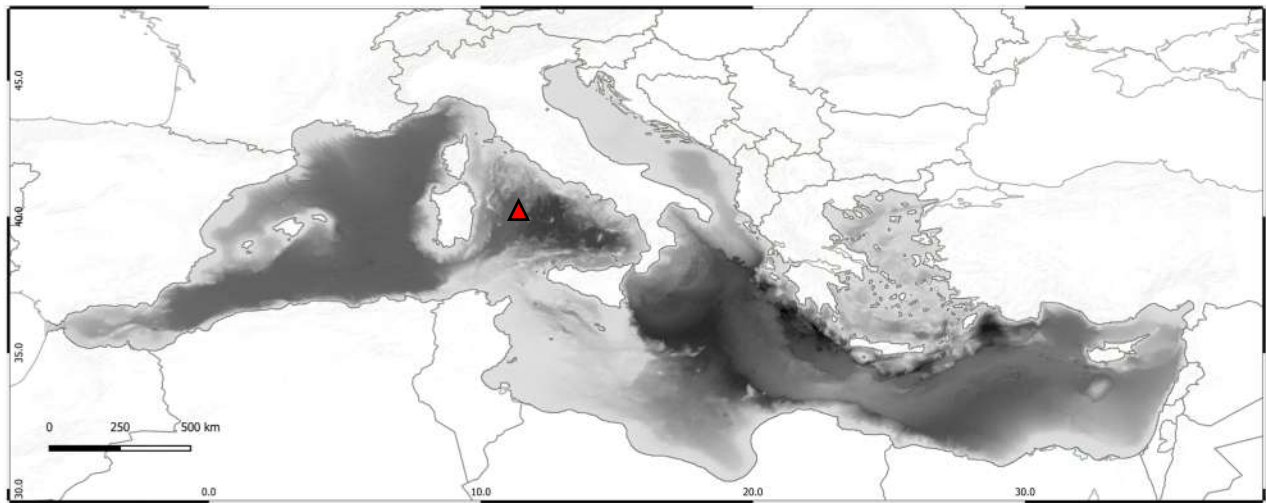

▲ ODP 107 653



| UNIT | LITHOLOGY                                                                              | SUBBOTTOM DEPTH | AGE                                                                           |
|------|----------------------------------------------------------------------------------------|-----------------|-------------------------------------------------------------------------------|
| I    | Hemipelagic to pelagic sedimentation                                                   | 0-216.6         | Quaternary, Pliocene, plus several tens of centimetres of probable Messinian. |
| II   | Sediments deposited in restricted marine to evaporitic and continental(?) environments | 216.6-264.3     | Messinian                                                                     |

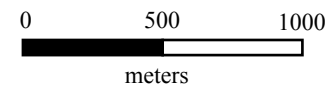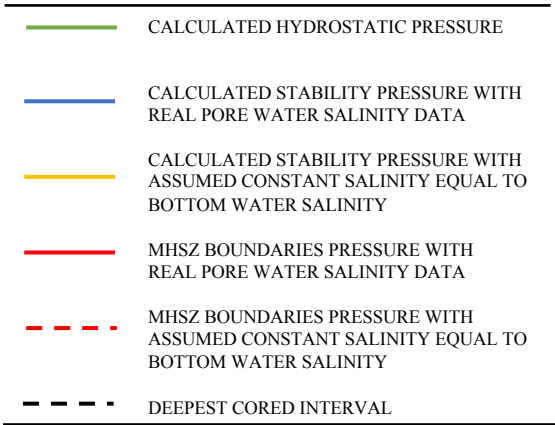

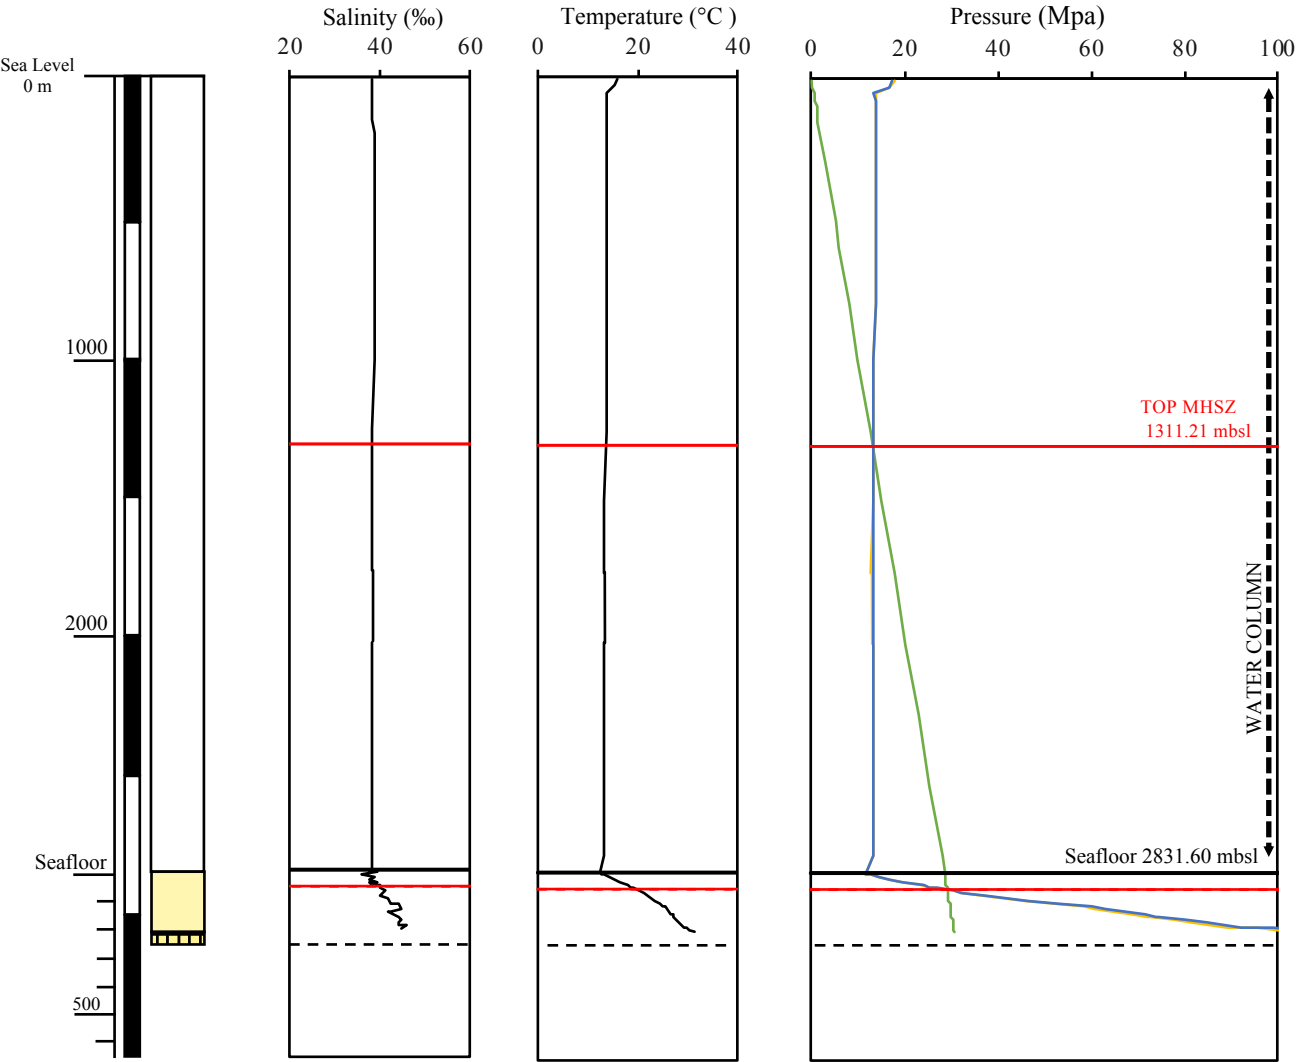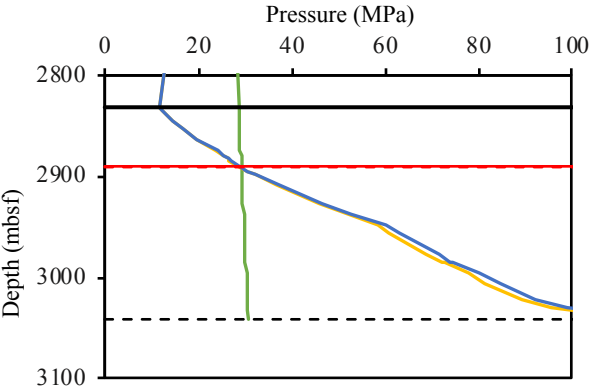

ODP LEG 107  
SITE 654

Upper Sardinia Margin  
Water depth: 2218.40 m  
Measured geothermal gradient in borehole : 44.176°C/km

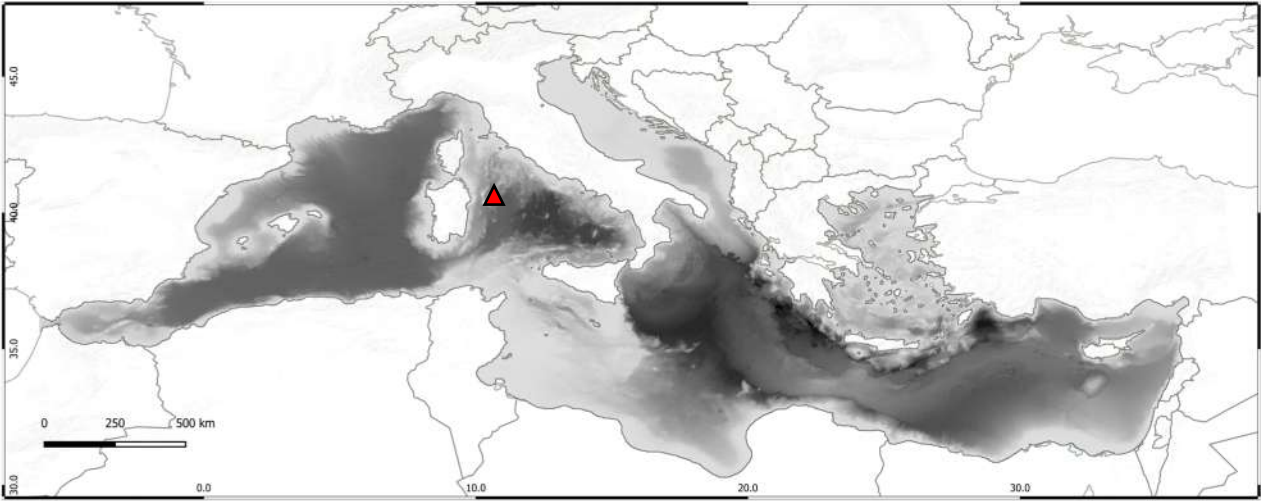

▲ ODP 107 654



| UNIT | LITHOLOGY                                                                                                                          | SUBBOTTOM DEPTH | AGE                                   |
|------|------------------------------------------------------------------------------------------------------------------------------------|-----------------|---------------------------------------|
| I    | Nannofossil oozes with subordinate calcareous muds, with minor terrigenous elastics, volcanic ashes, and sapropels                 | 0-242.7         | Pleistocene and Pliocene              |
| II   | Sediments deposited in restricted marine to evaporitic and continental(?) environments                                             | 242.7-312.6     | Messinian                             |
| III  | very dark colored, finely laminated, organic-carbon-rich claystone and siltstone, with minor volcanic ash                          | 312.6 – 348.9   | early to middle Messinian             |
| IV   | highly burrowed nannofossil oozes which contain a microfauna suggestive of shoaling downward into a more restricted marine setting | 348.9 – 403.9   | late Tortonian and earliest Messinian |
| V    | polymictic glauconitic sandstone and marly calcareous chalk                                                                        | 403.9 - 415.7   | indeterminate                         |
| VI   | reddish gravel-bearing calcareous mudstones                                                                                        | 415.7 – 473.8   | indeterminate                         |



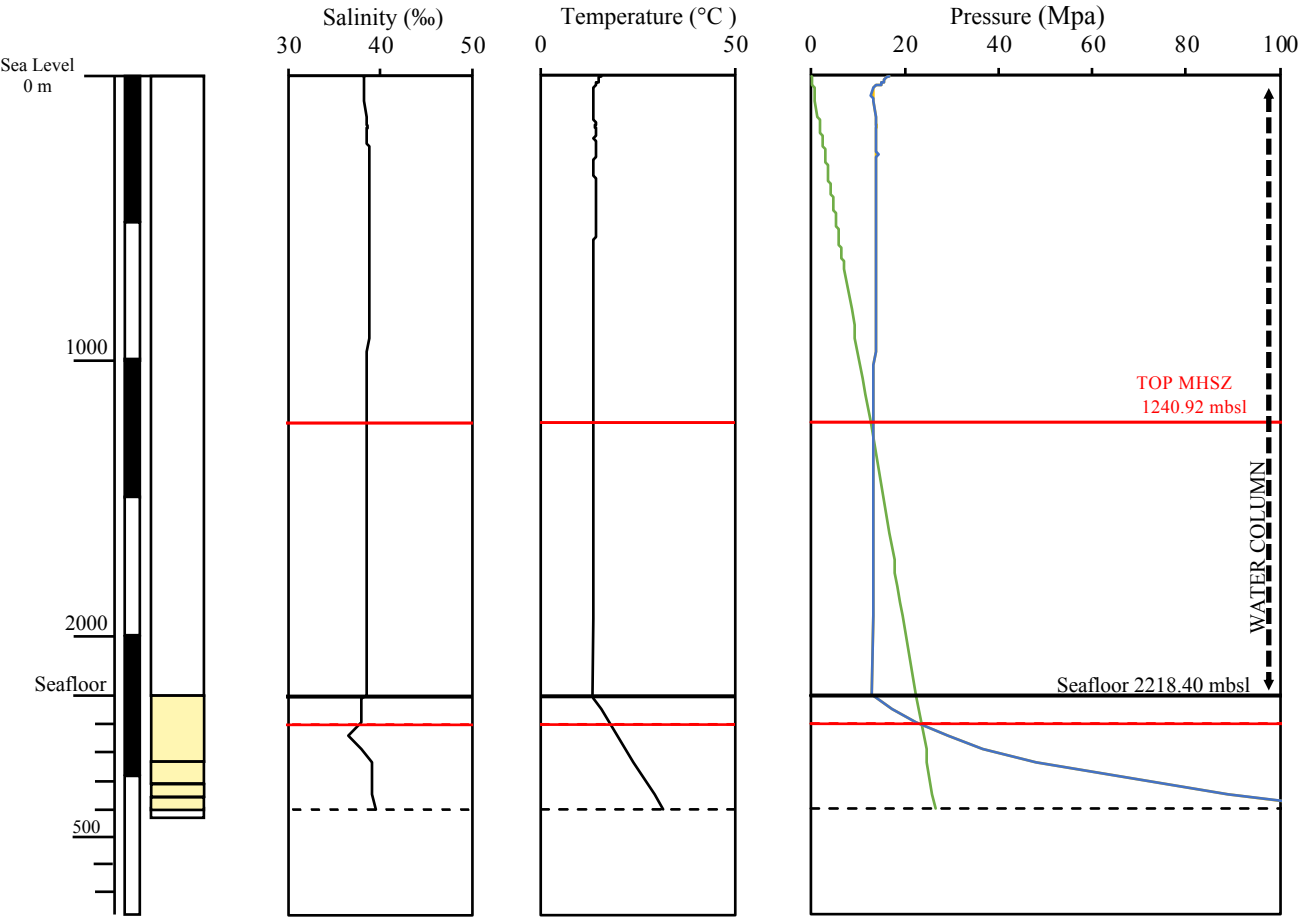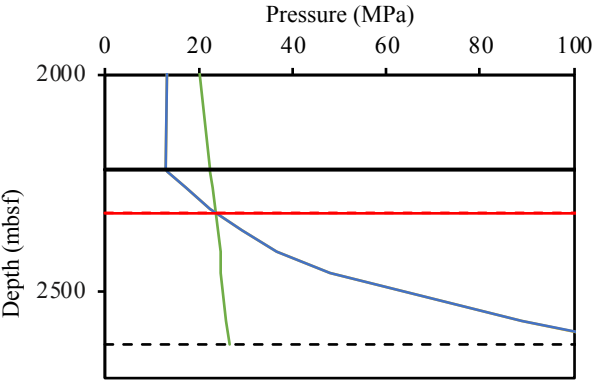

ODP LEG 107  
SITE 655

Gortani Ridge, Western Vavilov Basin  
Water depth: 3330.80 m  
Measured geothermal gradient in borehole : 67.29 °C/km

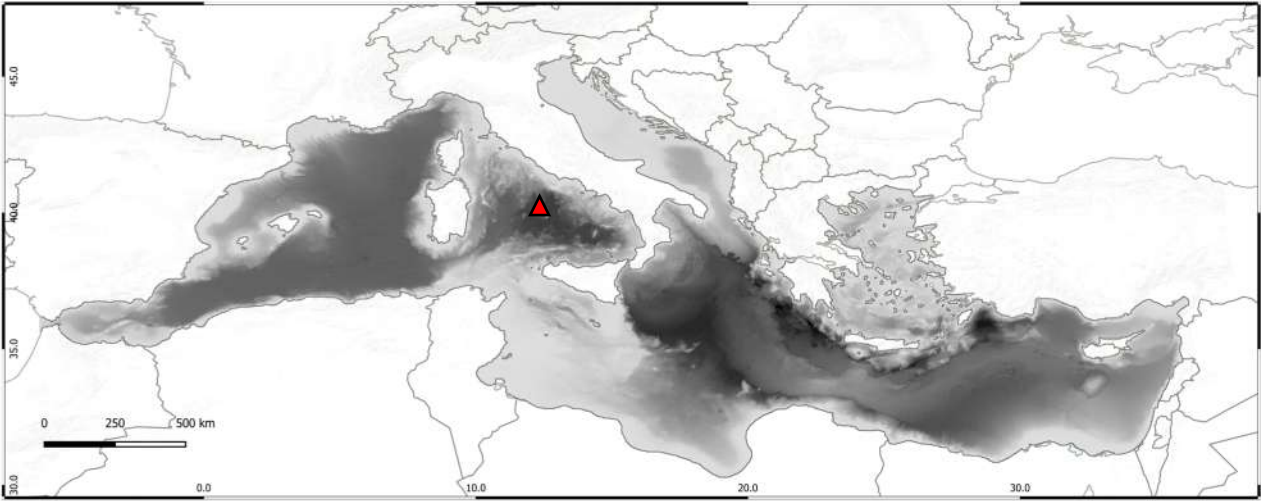

▲ ODP 107 655



| UNIT | LITHOLOGY                                                                              | SUBBOTTOM DEPTH | AGE                                |
|------|----------------------------------------------------------------------------------------|-----------------|------------------------------------|
| I    | Marly nannofossil ooze, with occasional volcaniclastic layers and detrital sand layers | 0-79.9          | late Pliocene (MP14) to Quaternary |
| II   | Basalt                                                                                 | 79.9-196.1      |                                    |

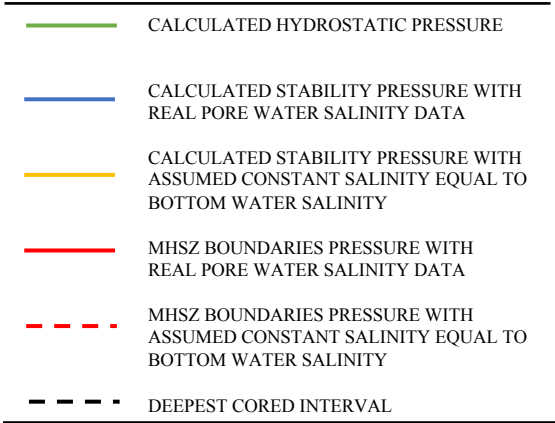

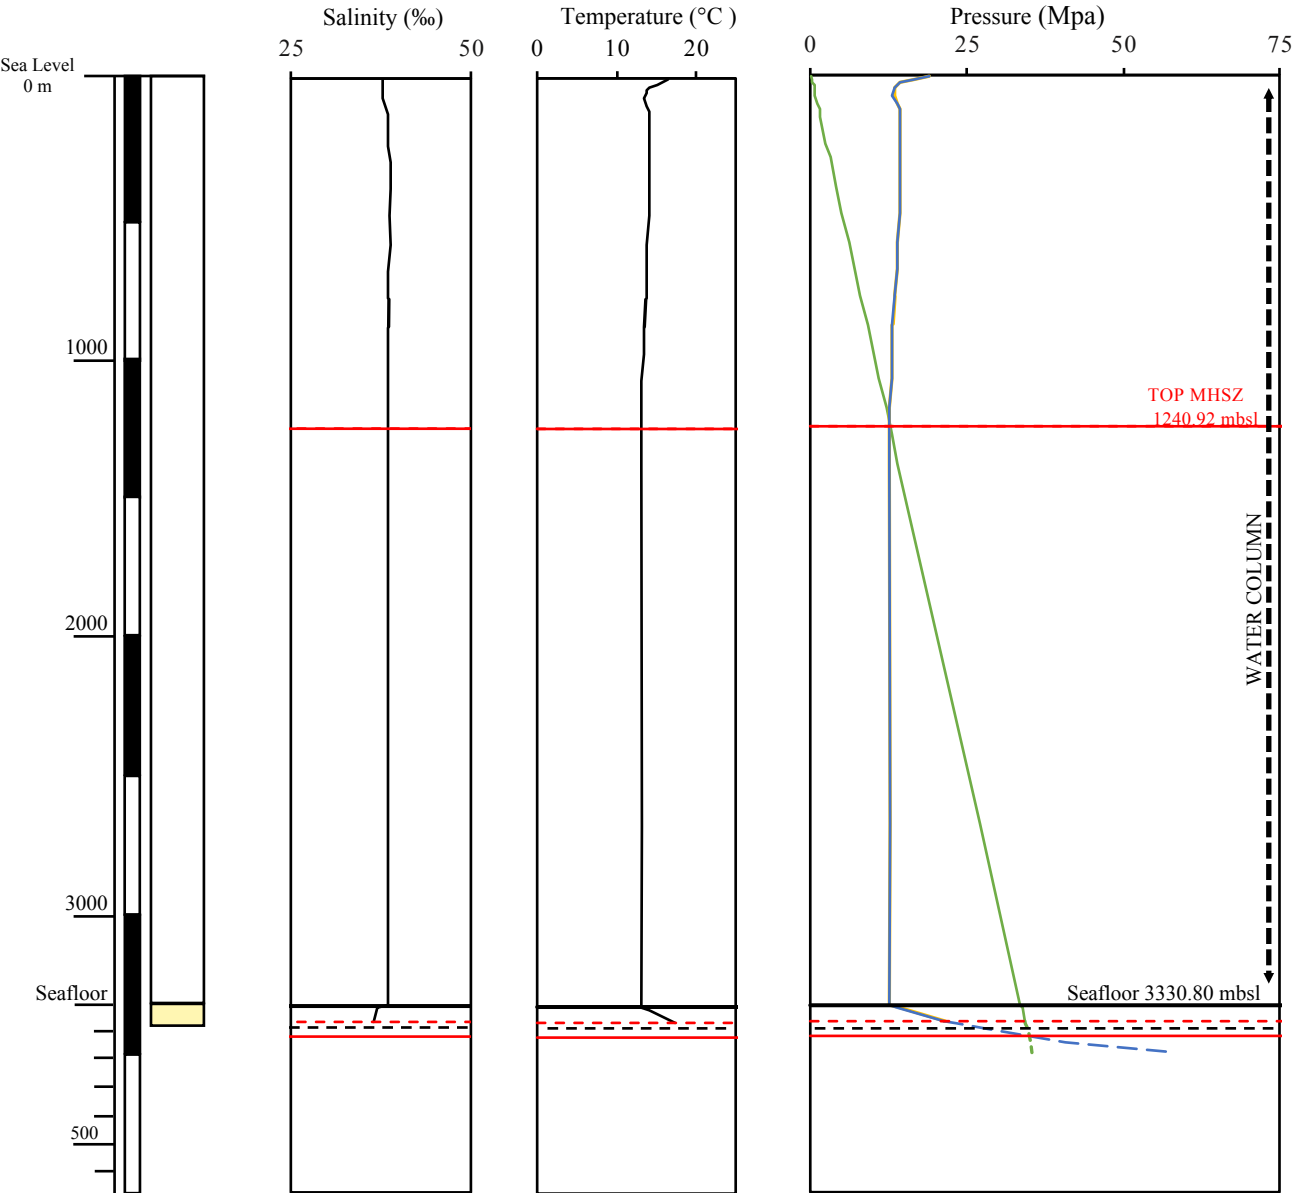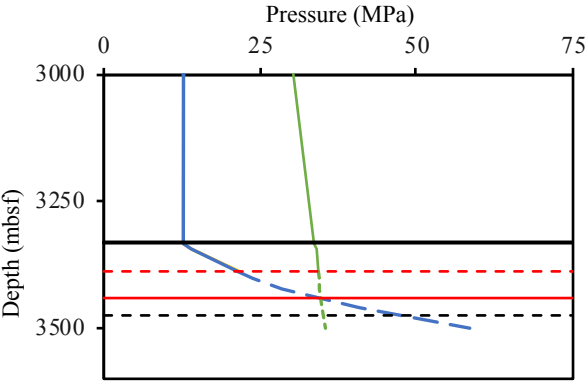

Supplement: Supplementary file 2 [file 1]
